# Supplementary material for: A Pan-Cancer Comparative Analysis of The Cancer Genome Atlas Transcriptomic TIL-Immune Signatures
Source: Research Square preprint supplement (doi:10.21203/rs.3.rs-6441170/v1), 2025-04-25
Supplement: Supplementary file 1 [file c131b492846d755885621739.xlsx]

## Sheet: Supp T1
Signature Name	Lowery_NeoTCR4	Lowery_NeoTCR8	Krishna.ACT.CD8.Stem.Like	Krishna.ACT.CD8.Term.Diff	Li.CD8.DYS	TOX_Scott	Grog.8EFF	Grog.8EM	Grog.8Trm.1	Grog.8Trm.2	Grog.8Trm.3	Grog.8chrom	Grog.8Mit	Grog.8KLRB1	Oh.CD8.CD39	Oh.CD8.Naive	Oh.CD8.HSP	Oh.CD8.MAIT	Oh.CD8.FGFBP2	Oh.CD8.RPL	Oh.CD8.MITO	Oh.CD8.XCL	Oh.CD8.CM	Oh.CD8.PRO	Mel_Exhaust_Tirosh	CD8_G_Feldman	CD8_B_Feldman	Exhaust_1_Feldman	Exhaust_2_Feldman	Exhaust_3_Feldman	Mem_Eff_4_Feldman	Early.Act_5_Feldman	Mem_Eff_6_Feldman	LCMV_PROG.EX_Miller	LCMV_TERMN.EX_Miller	B16_PROG.EX_Miller	B16_TERMINAL.EX_Miller	Grog.CD4.Trm	Grog.CD4.RPL32	Grog.CD4.TCF7	Grog.CD4.FOS	Grog.CD4.IL6ST	Grog.Treg.1	Grog.Treg.2	CD3.MT	Oh.CD4.CM	Oh.CD4IL2RAHI	Oh.CD4IL2RALO	Oh.CD4.Activate
Gene Name	CXCL13	ATP10D	KLF2	ENTPD1	LAG3	IGKC	GNLY	GZMK	CCL4	KLRC2	GZMB	CCL4	HIST1H4C	KLRB1	CXCL13	GZMK	HSPA1B	CCR6	FGFBP2	RPL10	MT-CYB	XCL1	SELL	UBE2C	FCRL3	IL7R	CD38	SPC25	GEM	CCL3	LMNA	ELL2	PLAC8	ID3	1810011H11RIK	CCR6	GZMD	CRIP1	RPLP0	RPS8	FOS	IL6ST	IL32	TNFRSF4	RNR1	CCR7	IL1R2	FANK1	FOS
	HMOX1	GZMB	RASA3	CD69	HAVCR2	AVIL	NKG7	CCL4	XCL1	GNLY	NKG7	GNLY	TUBB	IL7R	AC002331.1	CST7	DNAJB1	KLRB1	PRSS23	RPS27	MT-CO2	XCL2	CCR7	SPC25	CD27	GPR183	CCL3	CDCA5	LAYN	EPSTI1	NR4A3	PFKFB3	S1PR1	CCR7	ACOXL	TCF7	GZMG	S100A4	RPS8	RPLP0	JUN	NR3C1	LTB	TNFRSF18	RNR2	PLAC8	IL2RA	IL2RA	EGR1
	ETV7	ENTPD1	FGFBP2	RRM2	MYO7A	TOX	GZMH	CCL5	CCL5	KLRC3	CCL5	XCL1	TUBA1B	NCR3	TSPAN13	CRTAM	HSPA1A	IL7R	FCGR3A	RPL13A	MT-CO1	CCL4	RNF125	AURKB	PRKCH	LMNA	STMN1	ESCO2	VCAM1	CD38	GPR183	DTHD1	SORL1	CD83	CD244	AFF3	GZMF	ACTB	RPS12	RPS12	JUNB	ICOS	ICOS	GAPDH	BMS1P20	CMTM8	EBI3	AC002331.1	FOSB
	ADGRG1	KIR2DL4	CDC25B	TYMS	GBP2	KLRB1C	CST7	CST7	CD69	CCL5	GZMA	RN7SK	HMGN2	LTB	ACP5	ITM2C	HSPA6	TMIGD2	GNLY	RPS19	MT-CO3	AC092580.4	YBX3	DLGAP5	B2M	NR4A3	MYO7A	CDC45	RDH10	FASLG	CDKN1A	SMAP2	SELL	BACE2	RASD2	CXCR5	GZME	SH3BGRL3	RPL39	EEF1A1	IL7R	BATF	TNFRSF4	PKM	ND3	SH3YL1	AC145110.1	RTKN2	MIR24-2
	PDCD1	LAYN	TCF7	CD8B	GALNT1	MEGF11	KLRD1	DUSP2	ZFP36	XCL1	GNLY	TNFAIP3	GAPDH	GZMK	KRT86	GPR183	ZFAND2A	LTB	S1PR5	RPS2	MT-ATP6	ZFP36	CNOT6L	BIRC5	ITM2A	TCF7	GOLIM4	ZWINT	FAM3C	IFI44L	CCR7	FKBP5	TCF7	ITGA7	FCER1G	DAPL1	DSC2	S100A11	RPS18	LTB	DNAJB1	ITM2A	BATF	BATF	COX3	C1orf162	TNFRSF4	TNFRSF9	CD69
	ENTPD1	HTRA1	C10orf54	KIAA0101	PDCD1	SCD1	GZMB	CD74	CD8A	XCL2	GZMH	KLF6	H2AFZ	RPLP0	LAYN	CLDND1	BAG3	GPR183	C1orf21	RPS27A	MT-ND2	RGCC	EZR	RRM2	TIGIT	MGAT4A	VCAM1	SHCBP1	KIR2DL4	GIMAP6	S1PR1	AIM1	CCR7	TNFSF11	OSGIN1	ID3	RASD2	ALOX5AP	RPL18A	RPS13	DUSP1	CORO1B	MIR4435-1HG	ICOS	COX1	ANXA1	C14orf182	RP11-1399P15.1	JUN
	CCDC50	CD70	LINC00861	CCL3	TNFRSF1B	RP23-284K1.6	CCL5	GZMA	XCL2	CCL4	ACTB	IFNG	HMGB1	GNLY	TNFRSF18	CMC1	FOS	CCR7	LAIR2	RPS14	MT-ND4	CD7	RGCC	CCNB2	ID3	CD55	WARS	DLGAP5	TNFRSF18	TRAFD1	KDM6B	TMEM39A	IL7R	IL1R2	CCL6	SLAMF6	CCL9	VIM	RPL32	RPS6	HSPA1A	CD74	CD27	MIR155HG	CYTB	SPINT2	CADM1	SAT1	DUSP1
	TOX	CXCR6	FAM65B	TUBA1B	CTLA4	PIF1	PRF1	NKG7	TSC22D3	KLRD1	CCL4	ANXA1	HMGB2	EEF1A1	KLRC2	CD74	SERPINH1	RORA	CEP78	RPL34	MT-ND1	ZFP36L2	RNF19A	APOBEC3B	GBP2	AIM1	HAVCR2	RAD51	MTSS1	LGALS9	ELL2	NR4A3	MGAT4A	SOSTDC1	CD200R2	OTX1	LTF	S100A6	RPL13	RPS3A	ZFP36	TNFRSF4	TIGIT	TNFRSF1B	ND4L	CD55	LAIR2	PMAIP1	KLF6
	CD4	HMOX1	RASGRP2	MKI67	TNFRSF9	TNFRSF8	IFITM2	CCL3	FOS	NKG7	CD8A	CCL5	TPI1	NFKBIA	SOX4	CCR7	HSPB1	CD55	GZMH	MALAT1	MT-ND5	CD69	AIM1	CDCA8	PDCD1	PER1	LGALS9	KIF18B	CADM1	CXCR6	TIPARP	PER1	FAM65B	DAPL1	GM10389	CD22	CCR1	PFN1	RPS13	RPL13	FOSB	TIGIT	RGS1	IL32	ATP6	SESN3	TNFRSF18	IL32	GADD45B
	TIGIT	ADGRG1	IL7R	UBE2C	KIR2DL4	TMEM163	IFITM3	CD8B	ZNF683	ZNF683	PFN1	LOC101060038	PFN1	PRF1	ENTPD1	TRAT1	JUN	EEF1A1	NKG7	RPS4X	MT-ND3	KLF6	CREM	GTSE1	KLRK1	FOSL2	ID3	RRM2	ENTPD1	RAB37	SC5D	TSPYL2	LTB	BMP7	CDK14	TNFRSF25	1810011H11RIK	CD52	RPL34	RPL32	NFKBIA	SOD1	UCP2	S100A4	ATP8	MYC	FANK1	LAYN	TCF7
	TNFRSF18	LRRN3	SH3BP5	HLA-DQA2	PAG1	NR2F6	LITAF	IFNG	JUN	LOC101060038	SH3BGRL3	CD69	ACTB	KLF2	HAVCR2	DUSP2	IFNG	FTH1	SPON2	RPLP1	MT-ND4L	ID2	GZMK	ZWINT	HSPA1A	EGR1	PRDX3	BIRC5	ETV1	CCR5	PLK3	TTN	FLT3LG	GCAT	GPR56	VAT1L	IGSF5	LGALS1	RPS23	RPL34	BTG2	LTB	CARD16	ENO1	CCL4	PGAP1	AC017002.1	HPGD	NR4A1
	NMB	ACP5	SLCO3A1	CDK1	ITGAE	SERPINB6B	HCST	CD8A	ANXA1	CD7	IFNG	CD8A	PPIA	RPL17	AKAP5	CD44	NR4A1	SC5D	FLNA	RPS18	MALAT1	CD52	PDCD4	TK1	SRGN	TSPYL2	MCM5	TK1	AFAP1L2	ZBP1	CD55	TMEM2	PXN	FAM160A1	AA467197	2610019F03RIK	GZMC	RGS1	RPL11	TPT1	IER2	GAPDH	GPX1	ACTB	COX2	PABPC1	LAYN	MAGEH1	PPP1R15A
	MYL6B	CTSW	P2RY8	STMN1	CCL3	FGR	ITGB2	LOC100996809	LOC101060038	GZMB	S100A4	HSPA1A	H2AFV	RPL3	PPAP2A	SH2D1A	DNAJB4	IFNGR1	RAB7L1	RPL13		PABPC1	SMCHD1	RAD51AP1	TNFRSF9	YPEL5	LSM2	HJURP	TNFRSF9	SAMD9L	NR4A1	IL6ST	A2M	IL7R	CSF1	HECTD2	HTRA3	MYL6	RPS19	RPL18A	EGR1	RPS8	TNFRSF18	PFN1	MALAT1	SC5D	CUL9	TIGIT	GADD45G
	AHI1	GALNT2	LYAR	IL5	CD27	LRRK1	GZMA	HLA-A	KLF6	CCL3	HCST	ZFP36L2	DUT	RPL13	CTLA4	YPEL5	DUSP1	NFKBIA	PLAC8	RPL3		BTG1	EEF1B2	KIAA0101	TMBIM6	CSRNP1	MTHFD1	UBE2C	NAB1	SIRPG	REL	NAB1	ATM	TNC	SLC16A10	MAPK11	LTB4R1	S100A10	RPS6	RPL4	PPP1R15A	COTL1	TNFRSF1B	DNPH1	ND2	BEX2	MZB1	MIR4435-1HG	ANXA1
	MAF	LINC01480	PXN	NDFIP2	CSF1	SUV39H2	GPR56	CXCR4	CD8B	LOC101929531	CD74	KLRD1	CALM2	RPS2	CXCR6	PPIL4	MRPL18	ODF2L	S100A4	RPS6		TMSB4X	S1PR4	MKI67	TNFRSF1B	REL	FASLG	CCNB2	PELI1	MX1	PBX4	IQGAP2	C20orf112	SERPINA9	GZMA	ART3	CD200R2	GAPDH	RPL37	RPL39	TNFAIP3	FKBP5	PIM2	CD7	ND1	KLF3	FOXP3	FOXP3	ATF3
	IFNG	CARS	LITAF	DUSP6	RAB27A	ESM1	GZMM	GZMM	ZFP36L2	IFITM2	CCL3	CXCR4	GSTP1	LYAR	RBPJ	RGCC	HSP90AA1	TMEM66	EFHD2	RPS3A			LMNA	STMN1	CADM1	SKIL	SNAP47	CENPW	DFNB31	HAVCR2	TNF	SLC7A5	GPR183	SLC43A1	SFPI1	TNFSF14	LGI2	COTL1	RPL29	RPL5	FTH1	EEF1A1	UBC	TYMP	ND4	LEF1	SOX4	CARD16	TUBA1A
	LAG3	LAG3	RAB7L1	CSF2	MIR155HG	CENPE	IFITM1	CLDND1	CXCR4	TYROBP	KLRD1	IL7R	HMGN1	RPL10A	GEM	CXCR4	HSPE1	NOSIP	KLRD1	RPL7			DDX21	TYMS	ACTB	PIK3R1	IFI35	GINS2	CTLA4	ACP5	IL7R	IPCEF1	EPB41	ART3	RAC3	TNFSF8	KLHL30	CFL1	RPL36	RPS5	CD69	RPLP1	S100A4	CD74	FOS	PASK	ZBTB32	HTATIP2	SERTAD1
	CXCR6	TOX	CDKN2D	XCL1	LYST	CCR2	CD52	HLA-DRB4	DUSP1	IFITM3	CFL1	FOSB	SLC25A5	SPOCK2	GZMB	TUBA4A	DNAJA1	EEF1B2	KLF3	RPL32			GLTSCR2	CDC20	CD8A	FOXP1	SKA2	RAD51AP1	HSPB1	DDX60	RGCC	DCTN6	ADD3	PGCP	P2RY6	S1PR1	MGAT3	ACTG1	RPS3A	RPL11	TSC22D3	TNFRSF18	UGP2	PGAM1	DUSP2	PTGER2	LAPTM4B	TBC1D4	SGK1
	IGFLR1	PTPRCAP	GPR155	UBE2S	DGKH	KLRC1	RAP1B	DNAJB1	BTG1	KLRC4	ZNF683	HSP90AA1	CRIP1	EEF1G	VCAM1	YBX3	FOSB	LMNA	GZMB	RPL18A			KLF2	KIFC1	RGS2	RGCC	NDUFB3	DTL	FKBP4	PDCD1	FOSL2	DUSP4	GRAP2	2610019F03RIK	HTRA3	FAM84A	SERPINB9B	KLRB1	RPL18	RPL10	HSP90AA1	UCP2	HSPB1	PRDX1	CD69	AP3M2	AC002331.1	LTB	TAGAP
	DUSP4	ASB2	STK38	TOP2A	RDH10	NT5DC2	ZNF683	GZMH	CD7	HOPX	CORO1A	MALAT1	ENO1	RPL4	NDFIP2	PIK3R1	ATF3	ZFP36	C12orf75	RPL11			ARID5A	CCNA2	FAIM3	PFKFB3	FABP5	SPC24	NAMPTL	SH2D3C	SIK1	RANBP2	KLRG1	WNT3	IL20RA	PGCP	GLIS1	CD99	RPS21	RPS18	HSPA8	EEF2	ACTB	CD27	ND5	SOCS3	TNFRSF9	LINC00152	NFKBIA
	ACP5	ITGB7	ADD3	HIST1H4C	CXCL13	CD244	ADGRG1								CD7	NAA50	CACYBP	PABPC1	PRF1				CHD1	TOP2A	EID1	MYADM	IFI27L2	CDCA3	MYO7A	GPR174	CSRNP1	FAM177A1	GIMAP5	TUBA8	E230016K23RIK	LIF	FCRL6									AIM1	NGFRAP1	CD27	DNAJB1
	LINC01943	PTMS	UBE2F	AIF1	TNS3	ASPM									CD9	LYST	FKBP4	EIF3E	KLRG1				FAM177A1	NUF2	HSPB1	ZFP36L2	PTTG1	PKMYT1	CXCL13	RPS6KA1	GPR132	GABARAPL1	TC2N	CCR6	GPR97	TREML2	PRPH									EEF1B2	IL32	BATF	CITED2
	LIMS1	CD8A	CD55	TUBB	SNAP47	FAM20A									CHN1	LDHA	HSPH1	TPT1	DSTN				BAZ1A	ASPM	RNF19A	USP36	ENTPD1	MELK	GOLIM4	GBP5	GLUL	RGPD6	TXNIP	WNT1	CHN2	SYNPO	LRRN4									AAED1	CRADD	ICA1	LMNA
	BATF	GPR68	BIN1	CLSPN	ENTPD1	ZDHHC2									SNAP47	OAZ1	HSP90AB1	FKBP11	ITGB1				DUSP2	ORC6	IFI16	TC2N	EPSTI1	ANLN	PHLDA1	GBP1	KIAA1683	CTLA4	GIMAP2	SHANK1	5031414D18RIK	SOSTDC1	HAVCR2									SNAPC1	PTPLA	ID3	IER2
	PCED1B	NSMCE1	ISG20	IFI27	PHLDA1	UBASH3B									FAM3C	RHOH	KLF6	RPS3A	LGALS1				KTN1	CENPW	LYST	FAM177A1	PDCD1	CDCA8	DNAJA4	PTPN6	RALGAPA1	CREM	TNFAIP8	OAF	VILL	WNT10A	CD244									KLF2	CARD16	UGP2	JUNB
	ITGAL	ABI3	RAP2B	HMMR	CD7	SAPCD2									PHLDA1	ISG20	TNFSF14	RPLP0	HIST1H1D				ETS1	SGOL1	PRF1	BTG2	TRAFD1	KIAA0101	TGIF1	S100PBP	PRNP	ETS1	IL16	MAGED1	KLRA3	KCNMB1	5830473C10RIK									SELL	MAGEH1	DUSP10	ID2
	YPEL2	SLC1A4	DUSP2	EGR1	AKAP5	SCD2									GALNT2	GZMM	DEDD2	RPL22	BIN2				DDX3X	NCAPG	STAT1	TSC22D2	SIRPG	GGH	HAVCR2	IFI35	PRMT10	PNRC1	RIPOR2	MORN4	KLRA7	CD40LG	RASSF6									EEF1A1	GCNT1	SAMHD1	BTG2
	MAL	PLEKHF1	SAMD3	KPNA2	IFNG	KIF20B									MIR155HG	LITAF	MXD1	AIM1	ITGB2				SKIL	TPX2	UBC	FAM65B	RGS3	AURKB	APLP2	OAS3	SORL1	ZFP36L2	NOL4L	SCMH1	RANBP17	DTX1	GPR56									ARID5A	CD79B	USP15	TNFAIP3
	PPT1	CD8B	S1PR4	TPX2	FAM3C	CCR5									FKBP1A	ARID5A	CD69	RPL5	MYL12A				PABPC1	CKAP2L	CD74	STAT4	UBE2F	ASF1B	GPR56	SNAP47	FAM177A1	RGPD5		NSG2	S1PR5	DHRS3	GZMB									RPS12	CD27	CD74	ZFP36
	ELMO1	LINC01871	FAIM3	ZWINT	PTMS	ACSL3									CARS	LMNA	PPP1R15A	PFKFB3	DIP2A				PDE4B	ASF1B	IL2RG	RGPD5	SNRPD1	CDC20	BPGM	GIMAP4	CHMP1B	ZNF331		PAQR8	GM4956	SELL	1300014I06RIK									LSR	EPHX2	AC017002.1	DNAJA1
	MIS18BP1	CCL4	GIMAP4	TK1		WEE1									IGFLR1	ZNF331	ANKRD37	GLTSCR2	PTPRE				TMEM66	CKS1B	FYN	NEU1	FIBP	NCAPG	SEC14L1	PARP9	ZC3H12A	CNOT6L		KIT	TYROBP	ST8SIA1	FILIP1									TCF7	SYNGR2	ISG15	MYLIP
	TMEM173	NKG7	TRADD	CD38		HMMR									AMICA1	HLA-DQB1	HSPD1	RGCC	CD52				GPR183	CDKN3	PTPN6	IFRD1	CLTA	DHFR	TNIP3	IFNG	TSC22D2	TGIF1		BC048355	HEYL	TNFRSF13B	CDKN2A									GLTSCR2	HLF	WDR74	BRD2
	ADI1	CLIC3	TNFAIP3	UBE2T		SH2D5									SIRPG	CCSER2	RHOB	SPOCK2	MYO1F				MCL1	HIST1H2AJ	HLA-DRB1	PDE4B	CXCL13	KIFC1	METRNL	SIT1	P2RY8	CXCL13		4930583H14RIK	TIFAB	CXXC5	GPR97									TMEM66	LTA	FRMD4B	ZFP36L2
	SLA	NDFIP2	CTD-3184A7.4	NUSAP1		MYO1E									CD63	LEPROTL1	CHORDC1	RPL10	SSBP4				MT-ND2	CDK1	HNRNPC	NR4A1	NMI	TYMS	HSPH1	PYCARD	NEU1	PDE4D		TWIST2	KLRA9	PLA2G4F	AA467197									PTGER4	ACP5	GLRX	DNAJB4
	GALM	PLPP1	LTB	PCNA		CENPF									ALOX5AP	SLBP	NEU1	RPS12	CTSW				TSPYL2	UBE2T	UBB	RIPOR2	DNPH1	CKAP2L	KLRC2	RGS3	TCF7	RNF19A		SLC12A8	AGPAT9	XCL1	ADAM8									RASGRP2	PTP4A3	GBP2	KLF2
	LBH	PCED1B	CCDC109B	CENPF		HAVCR2									CD82	SRSF7	AHSA1	RPL9	AES				YPEL5	HIST1H1B	CD8B	CRYBG1	PCNA	CLSPN	PMAIP1	XAF1	ZNF683	CRYBG1		HSD3B7	KLRB1C	CD83	CDH17									RPL10	TIGIT	SELL	TUBB4B
	SECISBP2L	CXCL13	GZMK	H2AFX		EOMES									TIGIT	DNAJB9	RGS2	RPL17	HOPX				GSPT1	CENPU	HAVCR2		ACP5	MLF1IP	DUSP4	OAS2	MYADM	CEMIP2		TCF7	ENTPD1	CYR61	FCER1G									GPR183	DNPH1	LAIR2	SOCS3
	CTSB	PDCD1	NOSIP	CRTAM		PAK6									AC092580.4	CREM	CITED2	ZFP36L2	IFITM2				MT-ND1	NUSAP1	IRF8		MRPL28	TROAP	IGFLR1	C5orf56	ATP2B1			1700019D03RIK	INSC	KLF3	EPDR1									GIMAP7	CTSC	PELI1	NR4A2
	C17orf49	PRF1	CYTH1	ASPM		AHR									PDCD1	WIPF1	HSPA8	NDFIP1	SELPLG				SELK	CCNB1	LAG3		FARSA	KIF2C	HSPA1A	GIMAP5	CREM			H2-OB	RAB3IL1	S1PR5	CHL1									RPS3A	HTATIP2	C16orf80	HSPA1B
	CORO1B	HLA-DMA	SAMHD1	GTSE1		ARSB									HLA-DRA	CALM2	CLK1	RPSA	CD47				RPLP0	GGH	ATP5B		COX5A	WDR34	ZFAND2A	ABI3	OAT			ROPN1L	CHIT1	FAM160A1	IL1R2									RPS13	PKM	HLA-DQB1	TSC22D3
		GPR25	PHACTR2	TNFRSF18		KLRK1									CKLF	RNF19A	TUBA1A	GCHFR	SAMD3				EIF4G2	TUBB	STAT3		MRPL51	CDK1	NDFIP2	SNX20	NFE2L2			XCL1	GLP1R	SH2B3	CCL3									RPL3	SAT1	GBP5	TUBA1B
		CD9	PPP2R5C	MYBL2		IL10									NAB1	CD27	TAGAP	ARL4A	EMP3				TGFB1	CENPF	IGFLR1		SNRPE	KIF23	PAM	VAMP5	DNAJB9			CD22	HDHD3	TESPA1	SPP1									RNF125	BATF	CAST	C1orf63
		TIGIT	CDC42SE1	CKS1B		CKAP5									RP11-291B21.2	DUSP4	MIR24-2	RPS5	PFN1				CD55	MAD2L1	MGEA5		RANBP1	PLK1	TP53INP1	IRF2	SKIL			FCRL1	ATG9B	LRIG1	ACOXL									SLC2A3	OTUD5	CMTM7	NFKBIZ
		HLA-DRB5	LGALS3	SPC25		ALYREF									RGS1	CALM1	DDIT3	VIM	RNF125				EIF4A3	SMC2	HSPA1B		NOP10	TOP2A	AHI1	UBASH3A	DENND4A			TNP2	ARAP3	IL18	ENTPD1									RPL9	ADAT2	TNFRSF4	PTGER4
		SYTL3	SPOCK2	CDKN3		GEN1									LSP1	TERF2IP	CCL3	SOCS1	TMSB10				PIK3R1	PRC1	COTL1		PYCARD	NUF2	UBE2F	PARP10	SERTAD1			MMP10	TRPC1	NSG2	CALCA									RPS5	OAS1	RHBDD2	CCNL1
		SLF1	TSC22D3	IFNG		IL24									LAG3	SBDS	SERTAD1	FAM177A1	ATP2B1				RSL1D1	CLSPN	VCAM1		GTF3C6	HMGB3	HSPA4	GIMAP7	YPEL5			FAM190A	FAM19A3	SSPO	CTNND2									RPL21	CTLA4	ISG20	ZFP36L1
		NEK1	YWHAQ	AURKA		ECT2									KLRC1	RPL27A	CDC42EP3	RPL7	CALM1				IDI1	RNASEH2A	HLA-DMA		CCR5	ASPM	ICOS	GBP4	BCL6			LTA	SERPINB1A	TBC1D4	NEB									MBP	GLRX	MRPL1	DDX3X
		CASP1	GIMAP1	FEN1		MKI67									HLA-DQA1	FAM177A1	GADD45B	STAT4	CLIC3				RPS12	CENPE	PDE7B		GSTO1	MCM2	CHORDC1	PVRIG	EGR1			DYNC2LI1	QSER1	SH3BP5	LY6G5B									GIMAP5	MIR4435-1HG	HLA-DRB1	FUS
		SMC4	DSTN	GINS2		GTF2IRD1									CAPG	LYAR	ABHD3	RPL10A	BHLHE40				RSL24D1	MCM7	TBC1D4		OAS3	ORC6	TRPS1	CYTH4	PDE4B			DPYSL5	WDR31	P2RX7	UPP1									CCDC109B	LTB	RPS27L	SOCS1
		TSEN54	C16orf54			GZMA									LGALS3	COTL1	BTG2	RPL3	LYAR				SLC7A5	FBXO5	SNAP47		IGFLR1	CASC5	TBC1D4	DTX3L	ANXA1			AICDA	RIPPLY3	TNP2	AOAH									RPL30	TBC1D4	UBE2B	CXCR4
		PLSCR1				KLRB1									PLPP1			CRYBG1	RAB29				CRYBG1	PCLAF	FCMR			PCLAF	ADGRG1		IQCN			CPQ	KLRB1	CPQ	ADGRG1									MCUB	MIR4435-2HG	MIR4435-2HG	RSRP1
		GNPTAB				SCD									JAML			NOP53					NOP53	SGO1	ATP5F1B			CENPU	WHRN		PRMT9			CCSER1	ADGRG1		CD200R1L									CRYBG1	LINC02099	CYTOR
		HLA-DPB1				SERPINB6																	SELENOK		OGA			KNL1	NAMPTP1						CD200R1L		ADGRG3									NOP53	LINCO1588	CFAP20
		PLEKHA1																																	SPI1		GZMH									PRXL2C	ENSG00000238049
		ARHGAP9																																	ADGRG3		ccl15										HACD1
		ALOX5AP																																	GPAT3		LTB4R
		SH3BP1																																	SERPINB1		SERPINB9
		NCF4
		NELL2
		GATA3
		PPM1M
		TNFRSF1A
		AC022706.1
		MCM5
		HLA-DRB1
		TNFSF10
		TRIM21
		HDLBP
		ERN1
		CALHM2
		SASH3
		ACTA2
		MAST4
		CAPG
		MPST
		IGFLR1
		GZMA
		CD27
		ITGAE
		SLA2
		RHOC
		COMMD8
		MYO1G
		SP140
		PHPT1
		CD2BP2
		PLEKHO1
		STAM
		MRPL16
		IL2RB
		ID2
		TESPA1
		GOLGA8B
		MIS18BP1
		VAMP5
		DAPK2
		HLA-DPA1
		TSG101
		IL4R
		CCND2
		CTSC
		TRAF3IP3
		NLRC3
		ORAI3
		GNLY
		MIR155HG
		CARD16
		CD82
		ECH1
		JAML
		EEF1G
		ETFB
		DAXX
		RBM4
		HCST
		RAB27A
		YPEL2
		CHST12
		ARPC1B
		PDIA4
		PDIA6
		AC243960.1
		TBC1D10C
		PTPN6
		PYCARD
		BST2
		BTN3A2
		MTG1
		MLEC
		DUSP4
		GSDMD
		SLAMF1
		IFI6
		PCID2
		GIMAP1
		ITGA1
		CSNK2B
		CDK2AP2
		MYO1F
		AC004687.1
		PTTG1
		APOBEC3C
		TSPAN14
		MOB3A
		STXBP2
		LCP2
		PLA2G16
		LINC00649
		CST7
		TADA3
		SIT1
		APOBEC3G
		SUSD3
		CD3G
		CCL5
		CDC25B
		TNFRSF1B
		HMGN3
		THEMIS
		ASF1A
		CTNNB1
		FIBP
		CCDC85B
		POLR3GL
		GIMAP6
		ARL6IP1
		CALCOCO2
		CCPG1
		KLRB1
		ACAA2
		ISG15
		EIF4A1
		CAT
		MANF
		XAB2
		GRINA
		GLO1
		LSM2
		SLFN5
		FKBP1A
		AKNA
		TAP1
		LMO4
		APEH
		C12orf75
		TMEM14A
		DNPH1
		C17orf49
		NUDT5
		MGAT1
		CCDC69
		EIF4EBP1
		PDHB
		ARL3
		UCP2
		IFI35
		HSBP1
		LYST
		MRFAP1L1
		ITGAL
		AIP
		RASAL3
		CAPN1
		ITGB1
		RBPJ
		LBH
		DYNLL1
		NME2
		MT1F
		SYNGR2
		ABTB1
		ZGPAT
		CD63
		ILK
		SKA2
		TMEM204
		ACO2
		HOPX
		CRIP1
		OXNAD1
		CCS
		GRAP2
		GSTO1
		HADHB
		IL16
		PIN4
		CUEDC2
		CALM3
		SAMSN1
		HM13
		SNAP23
		LPCAT4
		FAAP20
		EFHD2
		PRDX3
		CCM2
		C22orf39
		SDHA
		ARRDC1
		MAP4K1
		NDUFA13
		IL27RA
		C14orf119
[truncated: 103 more columns]

## Sheet: Supp T2
	Ectoderm/Neural Crest n=2626 (26.4%)	Mesoderm n=3457 (34.8%)	Endoderm n=3858 (38.8%)
Ethnicity
Hispanic or Latino	108 (4.1%)	128 (3.7%)	111 (2.9%)
Not Hispanic or Latino	2179 (83.0%)	2203 (63.7%)	2766 (71.7%)
Unknown	339 (12.9%)	1126 (32.6%)	981 (25.4%)
Race
American indian or Alaska native	5 (0.1%)	15 (0.4%)	5 (0.1%)
Asian	97 (3.7%)	104 (3.0%)	441 (11.4%)
Black or African American	281 (10.7%)	341 (9.8%)	245 (6.4%)
White	2089 (79.6%)	2496 (72.2%)	2534 (65.7%)
Unknwon	154 (5.9%)	501 (14.6%)	633 (16.4%)
Age at Diagnosis (years)
range	46-67	51-68	55-73
Mean	20	48	61
AJCC Stage
Stage I	208 (12%)	533 (48%)	1198 (33%)
Stage II	794 (47%)	168 (15%)	1137 (31%)
Stage III	391 (23%)	263 (24%)	912 (25%)
Stage IV	287 (17%)	135 (12%)	377 (10%)
Unknown	946	2358	234

## Sheet: Supp T3
Signature	OS_Coef	OS_P	OS_q	PF_Coef	PF_P	PF_q	AIC
Zhang CD8 TCS	-0.446044	4.58582e-10	1.11588e-08	-0.570179	9.39697e-17	2.74392e-15	52436.1
Tang_Ferroptosis	-0.33166	7.67113e-05	0.00048695	-0.193005	0.0147283	0.0268791	52500.2
Caushi.Stem-like memory	-0.329901	1.86015e-06	1.93987e-05	-0.392167	2.97521e-09	3.34139e-08	52470.6
Caushi.CD8.Stem-like memory	-0.247989	0.000728617	0.00354594	-0.312541	7.54529e-06	5.24578e-05	52485.9
Mem_Eff_6_Feldman	-0.241561	7.67595e-07	9.33907e-06	-0.280213	1.69873e-09	2.06679e-08	52469.5
Caushi.CD4-Tfh(1)	-0.221799	0.00164084	0.00630427	-0.293717	1.32727e-05	8.42531e-05	52487
Jansen_Stem like	-0.201198	0.000754528	0.00355358	-0.297069	1.4507e-07	1.41202e-06	52478.3
Caushi.CD8.TRM(IV)	-0.191723	1.57488e-05	0.000142651	-0.219423	1.93389e-07	1.76467e-06	52478.9
Caushi.CD4CD8(I)	-0.185111	0.000686669	0.00345703	-0.247812	1.75743e-06	1.42547e-05	52483.1
Caushi.CD8.CD4CD8(I)	-0.185111	0.000686669	0.00345703	-0.247812	1.75743e-06	1.42547e-05	52483.1
Lowery_NeoTCR8	-0.16758	0.00738027	0.0211657	-0.174659	0.0030214	0.00816897	52497.3
Mel_Exhaust_Tirosh	-0.161684	0.00158097	0.00623841	-0.202792	3.11109e-05	0.000181688	52488.7
Chatani_TP	-0.15688	1.21564e-06	1.36526e-05	-0.14269	3.39371e-06	2.6078e-05	52484.5
Caushi.CD4CD8(II)	-0.153665	0.00573449	0.0174424	-0.201139	0.000139178	0.000634998	52491.5
Caushi.CD8.CD4CD8(II)	-0.153665	0.00573449	0.0174424	-0.201139	0.000139178	0.000634998	52491.5
Caushi.CD4-Th(1)	-0.146951	0.00915548	0.0252208	-0.233443	1.20573e-05	8.00169e-05	52486.8
Oh.CD4.CXCL13	-0.144963	0.0324031	0.0761262	-0.236113	0.000281151	0.00114023	52492.9
Oh.CD4.CM	-0.141214	0.0416159	0.0903886	-0.216599	0.000942891	0.00312868	52495.1
Exhaust_3_Feldman	-0.135824	0.00085562	0.00390377	-0.150337	0.00010265	0.000535245	52491
Grog.8KLRB1	-0.134717	0.00260396	0.00927264	-0.160157	0.00015772	0.000697792	52491.8
Duhen_Tumor React CD8	-0.145095	0.000882142	6.2321e-05	-0.136457	6.82792e-06	4.01482e-05	52489.8
B16_PROG.EX_Miller	-0.13183	0.0477892	0.0982707	-0.190954	0.00264573	0.00742839	52497
Caushi.CD4-Treg	-0.131558	0.0295394	0.0709353	-0.183595	0.00144668	0.00431053	52495.9
Caushi.CD8.TRM(VI)	-0.131525	0.0134614	0.0352034	-0.177954	0.000417054	0.00152225	52493.6
Ghatalia_T Cell Inflation RCC	-0.125584	0.000106615	0.00062263	-0.129547	2.4664e-05	0.000150039	52488.3
Chen_Recurrent Papillary Thyroid	-0.124847	0.000419003	0.00226572	-0.123056	0.000251788	0.00105032	52492.7
Yost_CD8_Memory	-0.124512	0.017458	0.0439459	-0.177698	0.000356237	0.00133361	52493.3
Caushi.CD8-Effector(3)	-0.124362	0.0135027	0.0352034	-0.171522	0.000305546	0.00117394	52493
Grog.8EM	-0.124069	0.000976747	0.00419427	-0.141519	6.71637e-05	0.000363181	52490.2
Caushi.CD8-Effector(2)	-0.123712	0.00739349	0.0211657	-0.140377	0.00132063	0.00419156	52495.8
Hanada_Reactive T Cell NSCLC	-0.120306	0.00862991	0.0242301	-0.124905	0.0039457	0.00985311	52497.8
Caushi.CD8-Effector(1)	-0.117079	0.0437439	0.0912372	-0.161849	0.00321062	0.00852274	52497.4
Oh.CD8.CM	-0.1164	0.10352	0.182096	-0.171765	0.0113038	0.0220047	52499.7
Caushi.CD8-TRM(2)	-0.115129	0.0278397	0.0688915	-0.159505	0.00124777	0.00404832	52495.7
Oh.CD4IL2RAHI	-0.112849	0.0625721	0.121807	-0.159174	0.00524381	0.0122732	52498.3
Lowery_NeoTCR4	-0.112252	0.0358856	0.0818639	-0.108838	0.031942	0.0523992	52501.5
Grog.CD4.IL6ST	-0.110398	0.032849	0.0761262	-0.140073	0.00433761	0.0103818	52498
Oh.CD4.MITO	-0.105994	0.00344722	0.0114385	-0.0944608	0.00556012	0.0124889	52498.4
Grog.8Trm.2	-0.105542	0.00602649	0.0179565	-0.131803	0.000295562	0.00116627	52493
Zou_Immune Rxn HCC	-0.103987	0.0380528	0.0841774	-0.126566	0.00738223	0.0155142	52498.9
Guo_Exhau CD4	-0.100914	0.0551033	0.111737	-0.135207	0.00727062	0.0155142	52498.9
Oh.CD8.MITO	-0.100735	0.00222703	0.00812865	-0.0779697	0.0120111	0.0228669	52499.8
Oh.CD4.GZMK	-0.100368	0.0422347	0.0903886	-0.134477	0.00383353	0.00981922	52497.7
Li.CD8.DYS	-0.0974572	0.0584895	0.115398	-0.136677	0.00532585	0.0122732	52498.3
Krishna.ACT.CD8.Stem.Like	-0.0972674	0.103135	0.182096	-0.208295	0.000223773	0.000960909	52492.4
Caushi.CD8.Effector(II)	-0.0967646	0.0296374	0.0709353	-0.111097	0.00835127	0.0169345	52499.1
Yan_TCS	-0.0960444	0.00301844	0.0102487	-0.117362	0.000125447	0.000610511	52491.4
Yan_CD8 IFN Gamma	-0.0960444	0.00301844	0.0102487	-0.117362	0.000125447	0.000610511	52491.4
Oh.CD8.MAIT	-0.09507	0.0943964	0.172273	-0.124294	0.0212029	0.0372966	52500.8
Caushi.CD8-TRM(1)	-0.090635	0.0823204	0.154087	-0.147061	0.00279682	0.00770445	52497.1
Oliveira_TET	-0.0895533	0.115318	0.194301	-0.143684	0.00755103	0.0155275	52499
Zheng_Exhau T Cell	-0.0867719	0.135241	0.21939	-0.149516	0.00679974	0.0148173	52498.8
Grog.8chrom	-0.0796094	0.107931	0.187595	-0.10833	0.0200992	0.0362282	52500.7
Yost_CD8 Eff mem	-0.0785177	0.150954	0.242191	-0.163873	0.00140178	0.00426375	52495.9
Oliveira_Tumor Spec_Pro_Exhaust	-0.0784351	0.246291	0.366924	-0.120266	0.0605476	0.0900707	52502.6
LCMV_PROG.EX_Miller	-0.0748567	0.341391	0.465823	-0.170938	0.0230873	0.0399449	52500.9
Grog.8EFF	-0.0732549	0.056513	0.113026	-0.120057	0.000928578	0.00312868	52495.1
Shi_TCS	-0.072201	0.0984261	0.17741	-0.142923	0.000614368	0.00213566	52494.3
Oh.CD8.XCL	-0.0711505	0.131874	0.216333	-0.0861447	0.052528	0.0798864	52502.3
Caushi.CD8.Effector(III)	-0.069475	0.172424	0.270687	-0.1465	0.00231834	0.00676954	52496.8
Qi_TREG	-0.0681197	0.0371715	0.0834929	-0.0700779	0.0232556	0.0399449	52501
Caushi.MAIT	-0.0661401	0.335549	0.462172	-0.19636	0.00251005	0.00718563	52496.9
Oh.CD8.Naive	-0.0659833	0.260199	0.376129	-0.122706	0.0275398	0.0462161	52501.2
Oh.TIL_CD4.GZMK	-0.0643735	0.220532	0.331934	-0.0417265	0.400322	0.449592	52505.4
Yost_CD8 Act/Exh	-0.0624989	0.250814	0.367718	-0.0883562	0.0857696	0.119261	52503.1
Grog.8Trm.3	-0.0590656	0.113125	0.194301	-0.0964062	0.00609418	0.0134811	52498.6
Oh.CD8.CD39	-0.0571575	0.281785	0.399423	-0.105366	0.0356452	0.0578244	52501.7
Mem_Eff_4_Feldman	-0.0566667	0.360539	0.481985	-0.156402	0.00743833	0.0155142	52498.9
Grog.8Trm.1	-0.0560179	0.206686	0.314335	-0.105016	0.0120599	0.0228669	52499.8
CD3.MT	-0.0551491	0.166833	0.264757	-0.0969456	0.0100625	0.019853	52499.5
Oliveira_Tumor Spec_EM	-0.0526404	0.425844	0.526891	-0.122993	0.0484417	0.0754092	52502.2
Caushi.CD4-Th(2)	-0.0525565	0.310908	0.436467	-0.11337	0.0203745	0.0362766	52500.7
Wang_OS Benefit	-0.050211	0.421665	0.52618	-0.190492	0.00137663	0.00426375	52495.9
Early.Act_5_Feldman	-0.0475335	0.442565	0.542979	-0.147021	0.0124864	0.023372	52499.8
Oh.CD8.RPL	-0.0462838	0.183709	0.282332	-0.0357139	0.276555	0.333694	52504.9
Oh.CD4.GZMB	-0.0448346	0.371949	0.48923	-0.0925466	0.0495495	0.0761497	52502.2
Yost_CD8 Exh	-0.042933	0.477783	0.571773	-0.10723	0.0614775	0.0900707	52502.6
Grog.Treg.1	-0.0419064	0.332453	0.462172	-0.0611255	0.130816	0.170529	52503.8
Caushi.CD8.TRM(II)	-0.0399695	0.459438	0.558983	-0.116245	0.023533	0.0399514	52501
Yuan_Hypoxia	-0.0394289	0.381028	0.492301	-0.0867338	0.0421195	0.0675763	52502
Oh.CD4.TH17	-0.0375349	0.53921	0.634234	-0.106962	0.0651096	0.0941189	52502.7
Liu_Treg	-0.0357856	0.475683	0.571773	-0.0695218	0.142647	0.182689	52504
Oliveira_EMT	-0.033445	0.547352	0.634234	-0.130184	0.0129145	0.0238673	52499.9
Grog.CD4.TCF7	-0.0315966	0.344871	0.466214	-0.0236037	0.45583	0.500385	52505.5
Caushi.CD8.MAIT	-0.0314035	0.639294	0.712495	-0.118251	0.0616923	0.0900707	52502.6
Grog.CD4.RPL32	-0.0292661	0.376506	0.490802	-0.0120074	0.700807	0.746845	52506
Caushi.CD8.TRM(V)	-0.0241265	0.66539	0.73048	-0.0517524	0.325865	0.380611	52505.1
Bao_MSI vs. MSS	-0.0237278	0.544995	0.634234	-0.0318117	0.392602	0.444341	52505.4
Guo_Exhau CD8	-0.023428	0.668474	0.73048	-0.0466332	0.3673	0.418952	52505.3
Caushi.CD4-Tfh(2)	-0.0196646	0.743813	0.798505	-0.108511	0.0574362	0.0864503	52502.5
Caushi.CD8.Effector(I)	-0.0181539	0.750723	0.800041	-0.0983667	0.070571	0.100033	52502.8
Zhang_CD8 Infiltration	-0.00900971	0.872795	0.895034	-0.0194112	0.714516	0.755937	52506
CD8_B_Feldman	-0.00892362	0.867088	0.895034	0.0122992	0.807335	0.830077	52506
CD8_G_Feldman	0.00424757	0.942551	0.949051	-0.110823	0.0485511	0.0754092	52502.2
Oliveira_Pro_Exhaust	0.00490905	0.949712	0.949712	-0.0564253	0.446896	0.494294	52505.5
Oliveira_Tumor Spec_TET	0.00873752	0.882239	0.895034	-0.0528532	0.341388	0.395577	52505.2
Oliveira_Tumor Spec_AAT	0.0101529	0.882773	0.895034	-0.0595728	0.36016	0.414042	52505.3
Zheng_TREG	0.0128381	0.856469	0.893175	-0.0479809	0.476545	0.519221	52505.6
Oh.CD4.Activate	0.0140703	0.798205	0.844478	-0.0723697	0.164125	0.206571	52504.2
Oliveira_AAT	0.0168303	0.813362	0.854323	-0.101354	0.132194	0.1708	52503.8
Grog.CD4.FOS	0.021708	0.631404	0.709115	-0.0670184	0.117068	0.155381	52503.6
Oh.CD4IL2RALO	0.0241499	0.674872	0.73048	-0.0317962	0.558512	0.60402	52505.8
Feldman_CD8_G	0.0244024	0.675444	0.73048	-0.0865351	0.119377	0.157018	52503.7
Caushi.CD8-MHCII	0.0250358	0.582983	0.664965	-0.0468969	0.275244	0.333694	52504.9
Grog.Treg.2	0.0257044	0.556223	0.639437	0.00215048	0.958009	0.971315	52506.1
Oh.CD8.FGFBP2	0.0302772	0.596279	0.674859	-0.0552256	0.303625	0.3604	52505
Li_Pyroptosis	0.0324168	0.400124	0.503604	0.011998	0.742956	0.774797	52506
Guo_Supp Treg	0.0430509	0.515796	0.612246	-0.000946142	0.987962	0.987962	52506.1
Yost_Naive	0.0491301	0.393906	0.50009	-0.0437925	0.421597	0.469872	52505.5
Caushi.CD8.TRM(III)	0.056954	0.251862	0.367718	-0.00127208	0.978291	0.985038	52506.1
Yang_PD1Hi_Checkpoint	0.0590018	0.273153	0.390984	0.101635	0.0458437	0.072752	52502.1
Exhaust_2_Feldman	0.0613599	0.385446	0.493641	-0.0183786	0.783483	0.811266	52506
LCMV_TERMN.EX_Miller	0.0657622	0.363139	0.481985	-0.0682089	0.314358	0.370132	52505.1
Oh.TIL_CD4.GZMB	0.078176	0.117222	0.194482	0.0488546	0.297169	0.355629	52505
Yost_CD8 Activated	0.0796316	0.179015	0.278044	-0.0263388	0.63771	0.6846	52505.9
Oh.TIL_CD4IL2RALO	0.0824978	0.0911778	0.168506	0.0630726	0.169618	0.209867	52504.2
Yang_Cuproptosis	0.0853765	0.115782	0.194301	0.149216	0.0036967	0.00963784	52497.7
Guo_Activated Treg	0.0987465	0.0806495	0.15292	0.0749907	0.160405	0.203644	52504.1
Oh.TIL_CD4IL2RAHI	0.113563	0.0168506	0.0431612	0.0961102	0.0310646	0.051539	52501.5
Caushi.CD8.TRM(I)	0.12041	0.0427179	0.0903886	0.0189301	0.735789	0.772843	52506
Oliveira_TM	0.136152	0.0692845	0.133099	0.00704416	0.920474	0.939785	52506.1
Grog.CD4.Trm	0.138966	0.000921673	0.0040777	0.102484	0.00922734	0.0184547	52499.3
Li_Immune Inf	0.149858	0.00536911	0.0170411	0.0698651	0.167831	0.20943	52504.2
Wang_Cytokine Exp	0.152294	5.84951e-05	0.00040668	0.0564024	0.114892	0.155042	52503.6
TOX_Scott	0.16715	0.0130556	0.0352034	0.181804	0.00428312	0.0103818	52497.9
Dai_Activation CD4 CD8	0.174274	5.64129e-05	0.00040668	0.118171	0.00398174	0.00985311	52497.8
Grog.8Mit	0.175067	7.62636e-05	0.00048695	0.221348	1.44265e-07	1.41202e-06	52478.4
Caushi.CD4-Th(3)	0.180327	0.00154561	0.00623841	0.0860035	0.107055	0.146075	52503.5
B16_TERMINAL.EX_Miller	0.180775	0.00423082	0.0137267	0.0683927	0.251502	0.308566	52504.8
Oh.CD4.HSP	0.188964	0.00199539	0.00746992	0.0942394	0.103638	0.142747	52503.5
Hou_T Cell Prolif	0.206777	1.661e-05	0.000142651	0.0829429	0.0664133	0.0950622	52502.7
Wu_OS Pancreatic CA	0.208546	0.000100592	0.000611936	0.139655	0.00538005	0.0122732	52498.4
Oh.CD8.HSP	0.2182	0.000318432	0.00178812	0.102747	0.0732229	0.102794	52502.9
Mo_Hypoxia	0.227279	1.43543e-09	2.32858e-08	0.161529	6.18644e-06	4.5161e-05	52485.7
Oh.CD4.PROLIF	0.24836	8.22261e-10	1.715e-08	0.329534	9.66426e-18	3.52745e-16	52431.3
Oh.CD8.PRO	0.260209	3.69707e-12	1.27822e-10	0.334843	3.53097e-21	5.15522e-19	52414.9
Exhaust_1_Feldman	0.262953	1.22409e-12	5.95722e-11	0.321811	3.70311e-20	1.80218e-18	52419.7
Oliveira_Prolif_T	0.267849	4.37746e-12	1.27822e-10	0.339312	1.93523e-20	1.41272e-18	52418.4
Jansen_Term diff	0.268151	0.00114479	0.0047754	0.271372	0.000473838	0.00168732	52493.9
Oliveira_Tumor Spec_Prolif T	0.273775	4.99398e-06	4.86081e-05	0.351273	6.3406e-10	8.41571e-09	52467.7
Ahuluwalia_Prognostic Cell Death	0.276641	5.26738e-05	0.000404757	0.102853	0.115751	0.155042	52503.6
Krishna.ACT.CD8.Term.Diff	0.286105	1.24298e-09	2.26843e-08	0.361208	4.55006e-16	1.10718e-14	52439.2
Caushi.CD8-Proliferating	0.308493	1.49184e-08	1.98007e-07	0.382855	9.7163e-14	1.77322e-12	52450.4
Caushi.CD8.Proliferating	0.317688	1.46023e-08	1.98007e-07	0.425356	1.00064e-15	2.08706e-14	52441.1
An_CervicalCA	0.351516	8.30637e-13	5.95722e-11	0.309289	1.73598e-11	2.81614e-10	52460.8
Liu_Hypoxia	0.483426	1.67299e-14	2.44257e-12	0.393935	5.8942e-11	8.60553e-10	52463.3

## Sheet: Supp T4
Tumor	colnames.x1.	OS.OS_Coef	OS.OS_P	OS.OS_Coef_Stage	OS.OS_P_Stage	PF.PF_Coef	PF.PF_P	PF.PF_Coef_Stage	PF.PF_P_Stage	OSq	PFIq
Ecto	Zhang CD8 TCS	-0.38792	0.0075031	-0.730422	0.00276615	-0.52853	0.000134298	-1.03482	7.64923e-05	0.0551478	0.0113785
Ecto	B16_PROG.EX_Miller	-0.385304	0.00496707	-0.461069	0.0373526	-0.40323	0.00186274	-0.668622	0.00470004	0.0405644	0.0281467
Ecto	Caushi.Stem-like memory	-0.228038	0.098923	-0.319999	0.169873	-0.368128	0.00551011	-0.587414	0.0182336	0.356611	0.0539409
Ecto	Shi_TCS	-0.228332	0.013408	-0.281059	0.0508497	-0.259593	0.0031137	-0.522732	0.000499684	0.08959	0.0381428
Endo	Oh.CD4.CM	-0.206101	0.0518866	-0.187546	0.0847326	-0.442916	1.62353e-05	-0.456647	1.45835e-05	0.238354	0.0023866
Meso	Zhang CD8 TCS	-0.578833	5.38078e-06	-0.228484	0.221392	-0.72724	6.06666e-10	-0.402285	0.0149111	0.000790974	2.2295e-08
Endo	Lowery_NeoTCR8	-0.212297	0.0291432	-0.177411	0.0765984	-0.359845	0.000138883	-0.38498	7.79207e-05	0.208857	0.00403502
Endo	Yost_CD8 Eff mem	-0.0825601	0.330869	-0.109209	0.207514	-0.287683	0.0004987	-0.343507	4.85922e-05	0.56599	0.00403502
Endo	Zhang CD8 TCS	-0.301641	0.00607887	-0.267911	0.0178582	-0.364037	0.000635527	-0.34039	0.00192626	0.111699	0.00403502
Endo	Oliveira_AAT	-0.0195897	0.859476	0.0249561	0.82445	-0.33839	0.00168896	-0.333677	0.00232334	0.912352	0.00671021
Meso	Oh.CD4IL2RAHI	-0.292555	0.005059	-0.479784	0.000734181	-0.210893	0.0269775	-0.332245	0.0080445	0.0239376	0.0991422
Endo	Caushi.Stem-like memory	-0.330967	0.0011109	-0.315456	0.0024547	-0.347446	0.000418022	-0.329265	0.00113651	0.0326606	0.00403502
Endo	Wang_OS Benefit	-0.11629	0.235541	-0.139116	0.164818	-0.309047	0.00115934	-0.326308	0.000798628	0.457698	0.00535826
Endo	Caushi.CD8-Effector(1)	-0.166004	0.0579706	-0.157187	0.0768185	-0.317086	0.000199915	-0.322221	0.000200764	0.241706	0.00403502
Endo	Oh.CD4.TH17	-0.106718	0.245947	-0.113065	0.228536	-0.306659	0.000627812	-0.32057	0.000476132	0.469535	0.00403502
Endo	Oh.CD8.FGFBP2	-0.0609242	0.48588	-0.0962265	0.280111	-0.249562	0.00326835	-0.315572	0.000270797	0.665537	0.00960894
Endo	Guo_Supp Treg	-0.0208581	0.841828	-0.0533241	0.618401	-0.227286	0.0246006	-0.315141	0.00239206	0.912352	0.0452036
Endo	Caushi.MAIT	-0.141345	0.169588	-0.13013	0.216318	-0.323613	0.00130765	-0.312265	0.00244397	0.414564	0.00565365
Endo	Oliveira_TET	-0.0801197	0.357353	-0.120197	0.173569	-0.259642	0.00214346	-0.3112	0.000295828	0.56599	0.00732765
Endo	Caushi.CD8.MAIT	-0.160927	0.112735	-0.171043	0.0989378	-0.286077	0.00385438	-0.30603	0.0025242	0.345251	0.0111097
Meso	Caushi.CD4-Th(1)	-0.270742	0.00537376	-0.176815	0.20207	-0.297847	0.000820965	-0.300033	0.0146213	0.0239376	0.00709893
Endo	Caushi.CD4-Tfh(1)	-0.242651	0.0212283	-0.2433	0.0223742	-0.307805	0.00265205	-0.297709	0.00411732	0.183562	0.00812191
Endo	Oh.CD4.CXCL13	-0.108818	0.287118	-0.117607	0.252901	-0.307435	0.002015	-0.296434	0.00314935	0.514712	0.00705249
Meso	Yost_CD8 Exh	-0.267487	0.0107202	-0.346169	0.0165161	-0.160232	0.0946233	-0.296348	0.0202911	0.031604	0.204553
Endo	Caushi.CD8.Effector(III)	-0.0967573	0.211973	-0.140399	0.075203	-0.253775	0.000739082	-0.295519	0.000116694	0.438874	0.00417866
Endo	Oh.CD4.GZMB	-0.0789159	0.30201	-0.110236	0.15761	-0.247049	0.000872435	-0.295293	9.99428e-05	0.528518	0.00458028
Endo	Zheng_TREG	-0.0562697	0.607905	-0.117386	0.287421	-0.225654	0.03412	-0.293244	0.00629812	0.770362	0.0590075
Meso	Hanada_Reactive T Cell NSCLC	-0.209828	0.00843595	-0.36427	0.00116693	-0.125149	0.0844153	-0.290834	0.00345081	0.0292097	0.200146
Endo	Caushi.CD8-Effector(3)	-0.1245	0.100859	-0.141471	0.067172	-0.266017	0.000306578	-0.29057	0.000112275	0.322311	0.00403502
Endo	Caushi.CD8.Stem-like memory	-0.300977	0.00484965	-0.281801	0.010454	-0.323051	0.00190076	-0.289394	0.00702492	0.111699	0.00688525
Endo	Oh.CD8.MAIT	-0.116897	0.180644	-0.0716478	0.428204	-0.293406	0.000528261	-0.288926	0.000991796	0.419698	0.00403502
Endo	Jansen_Stem like	-0.205645	0.0249942	-0.190279	0.0407053	-0.320853	0.000319228	-0.288596	0.00141619	0.193376	0.00403502
Endo	Yost_CD8_Memory	-0.131229	0.110078	-0.10865	0.192587	-0.293276	0.000253579	-0.285806	0.000457665	0.344286	0.00403502
Endo	Oh.CD4IL2RAHI	-0.0413051	0.649363	-0.0773257	0.40251	-0.229898	0.00901722	-0.285029	0.0014873	0.79547	0.0220235
Endo	Grog.CD4.IL6ST	-0.131357	0.0993085	-0.117825	0.146314	-0.25453	0.000980674	-0.282827	0.000328216	0.322311	0.004971
Endo	KH_sig	-0.159344	0.0548596	-0.151268	0.0758509	-0.261877	0.00120287	-0.276116	0.000888637	0.241706	0.00535826
Endo	Caushi.CD8-TRM(1)	-0.101835	0.195784	-0.0974633	0.224491	-0.260153	0.000678469	-0.27438	0.000451399	0.419698	0.00403502
Ecto	Chatani_TP	-0.21257	0.00184936	-0.273854	0.0131896	-0.192513	0.00299005	-0.269601	0.0197215	0.0217793	0.0381428
Endo	Caushi.CD4CD8(I)	-0.16865	0.0397823	-0.16864	0.0424192	-0.271109	0.000686227	-0.269134	0.000908428	0.208857	0.00403502
Endo	Caushi.CD8.CD4CD8(I)	-0.16865	0.0397823	-0.16864	0.0424192	-0.271109	0.000686227	-0.269134	0.000908428	0.208857	0.00403502
Endo	Krishna.ACT.CD8.Stem.Like	-0.0865107	0.35367	-0.0648629	0.494245	-0.245471	0.00689308	-0.268881	0.00372171	0.56599	0.0191185
Endo	Caushi.CD4CD8(II)	-0.14096	0.0910945	-0.16261	0.053246	-0.251255	0.00192038	-0.266221	0.0011501	0.30506	0.00688525
Endo	Caushi.CD8.CD4CD8(II)	-0.14096	0.0910945	-0.16261	0.053246	-0.251255	0.00192038	-0.266221	0.0011501	0.30506	0.00688525
Endo	Oh.CD4.GZMK	-0.109462	0.147824	-0.0871692	0.256753	-0.259333	0.000406415	-0.264693	0.000399867	0.381229	0.00403502
Endo	Grog.8KLRB1	-0.1048	0.125844	-0.0692977	0.326015	-0.264545	6.9458e-05	-0.264019	0.000120773	0.356769	0.00403502
Meso	Oliveira_Tumor Spec_Pro_Exhaust	-0.295975	0.00991781	-0.4751	0.00404014	-0.105255	0.315123	-0.263724	0.0720823	0.0310195	0.424983
Endo	Zheng_Exhau T Cell	-0.060872	0.488966	-0.0845207	0.340929	-0.231735	0.00673346	-0.262941	0.00233862	0.665537	0.019035
Meso	Lowery_NeoTCR8	-0.372185	0.000378843	-0.447632	0.00260317	-0.174866	0.067227	-0.262124	0.046476	0.00495446	0.172945
Endo	Mem_Eff_6_Feldman	-0.200408	0.00786181	-0.162261	0.0367041	-0.278614	0.000150234	-0.262097	0.00055544	0.115569	0.00403502
Endo	Caushi.CD4-Th(1)	-0.166984	0.0471824	-0.121596	0.159463	-0.28159	0.000603817	-0.260972	0.00205564	0.231194	0.00403502
Meso	Caushi.CD8.Stem-like memory	-0.461546	0.0003351	-0.215333	0.272585	-0.417904	0.000332672	-0.259738	0.128512	0.00492596	0.00349306
Meso	Exhaust_2_Feldman	-0.256794	0.0315966	-0.27531	0.107434	-0.206622	0.0603558	-0.259517	0.087323	0.0578441	0.161315
Meso	Caushi.CD8.TRM(II)	-0.191165	0.0440619	-0.321398	0.0146703	-0.158134	0.0682366	-0.257119	0.0277607	0.0703099	0.172945
Meso	Oh.CD8.FGFBP2	-0.190041	0.0473819	-0.31991	0.0220552	-0.110481	0.208633	-0.255271	0.0391281	0.0740972	0.329774
Endo	Caushi.CD4-Treg	-0.0992482	0.270561	-0.150586	0.0971219	-0.218901	0.012331	-0.255174	0.00387951	0.497155	0.0270545
Endo	Caushi.CD8-TRM(2)	-0.0747848	0.341184	-0.0823543	0.303943	-0.231308	0.00245709	-0.252998	0.00119358	0.56599	0.007852
Endo	Yost_CD8 Exh	-0.0585666	0.521945	-0.0942271	0.306794	-0.214316	0.0158022	-0.252525	0.00490505	0.691225	0.0331741
Meso	Caushi.CD4CD8(II)	-0.297646	0.00239968	-0.309623	0.0254397	-0.248814	0.00542809	-0.251805	0.0404221	0.0145825	0.0319171
Meso	Caushi.CD8.CD4CD8(II)	-0.297646	0.00239968	-0.309623	0.0254397	-0.248814	0.00542809	-0.251805	0.0404221	0.0145825	0.0319171
Meso	Caushi.Stem-like memory	-0.523796	1.479e-05	-0.275809	0.123411	-0.483873	1.0801e-05	-0.251365	0.109168	0.00108706	0.000144341
Endo	Yost_CD8 Act/Exh	-0.0842362	0.295628	-0.112132	0.168193	-0.208207	0.00769162	-0.25096	0.0015234	0.523582	0.0201905
Meso	Caushi.CD4-Treg	-0.306231	0.00473928	-0.349671	0.0242095	-0.222731	0.0240985	-0.25064	0.0667076	0.0232225	0.0991422
Endo	Guo_Exhau CD8	-0.00371189	0.964636	-0.0132469	0.876938	-0.19556	0.0160229	-0.249973	0.00265344	0.983534	0.0331741
Meso	Caushi.CD4CD8(I)	-0.332384	0.000520831	-0.244814	0.0682309	-0.300933	0.000577308	-0.248998	0.0357673	0.00546873	0.00530401
Meso	Caushi.CD8.CD4CD8(I)	-0.332384	0.000520831	-0.244814	0.0682309	-0.300933	0.000577308	-0.248998	0.0357673	0.00546873	0.00530401
Endo	Mel_Exhaust_Tirosh	-0.0992666	0.202862	-0.101572	0.199867	-0.230023	0.00240194	-0.248811	0.00125993	0.42601	0.00784634
Meso	Zheng_Exhau T Cell	-0.263132	0.00945738	-0.368277	0.00880724	-0.16571	0.0730871	-0.248388	0.0450073	0.0306599	0.182098
Meso	Oliveira_Tumor Spec_TET	-0.233758	0.0215732	-0.374762	0.00945373	-0.0718605	0.439184	-0.245456	0.0571123	0.0446657	0.542521
Endo	Caushi.CD8.TRM(IV)	-0.140414	0.0383636	-0.135612	0.0488135	-0.239219	0.000286201	-0.245056	0.000264693	0.208857	0.00403502
Endo	Li.CD8.DYS	-0.100386	0.195847	-0.123005	0.117338	-0.222485	0.00319773	-0.244803	0.00138093	0.419698	0.00959318
Endo	Oliveira_Tumor Spec_EM	-0.0042498	0.965854	-0.0341881	0.733653	-0.195605	0.0422858	-0.243722	0.0124304	0.983534	0.0683078
Meso	Caushi.CD8-Effector(3)	-0.236637	0.00580318	-0.320961	0.00764953	-0.158123	0.0441489	-0.242658	0.0228368	0.0250902	0.138083
Endo	Caushi.CD8.TRM(V)	-0.0766564	0.360333	-0.0877211	0.301159	-0.212422	0.00887887	-0.241716	0.00334718	0.56599	0.0220235
Endo	Oh.CD8.CM	-0.117067	0.277711	-0.104688	0.347154	-0.227719	0.02974	-0.241531	0.0255891	0.503994	0.052045
Meso	Caushi.CD8-TRM(1)	-0.166516	0.0594446	-0.303008	0.0161507	-0.100137	0.214624	-0.240192	0.0306704	0.0882662	0.332102
Meso	Yost_CD8 Eff mem	-0.262484	0.00393511	-0.259891	0.0476195	-0.186767	0.0249243	-0.239726	0.0390127	0.0206593	0.0991422
Meso	Oliveira_EMT	-0.269614	0.00473065	-0.153144	0.259727	-0.283465	0.00116868	-0.239368	0.0466496	0.0232225	0.00954424
Endo	Oh.CD4IL2RALO	0.0168257	0.849694	-0.0225673	0.803099	-0.178851	0.0374823	-0.237725	0.00678562	0.912352	0.0626125
Endo	Oh.CD8.Naive	-0.0775297	0.378776	-0.0572682	0.523434	-0.222461	0.00926987	-0.234865	0.00705323	0.574215	0.0220235
Endo	Caushi.CD8.TRM(VI)	-0.0541332	0.502784	-0.0600658	0.466455	-0.205669	0.00873295	-0.234853	0.00342792	0.678067	0.0220235
Endo	Caushi.CD8.Effector(I)	0.000517731	0.995272	-0.0209717	0.812246	-0.198787	0.0197845	-0.234723	0.00659333	0.995272	0.0382674
Meso	Oh.CD8.CD39	-0.228946	0.0125958	-0.372268	0.0029764	-0.127852	0.127121	-0.233761	0.0348366	0.0336651	0.233584
Meso	Yost_CD8_Memory	-0.226652	0.0117551	-0.309371	0.0158448	-0.156421	0.0573786	-0.231561	0.0401912	0.0332307	0.161315
Meso	Caushi.MAIT	-0.306074	0.0107496	-0.0511964	0.762737	-0.351792	0.00139869	-0.230329	0.124055	0.031604	0.0108214
Endo	Grog.8EFF	-0.0810808	0.17203	-0.0874226	0.147999	-0.205582	0.00036358	-0.229818	9.47989e-05	0.414564	0.00403502
Endo	Oh.TIL_CD4.GZMK	-0.0743994	0.356091	-0.0688651	0.41136	-0.188062	0.0159776	-0.229091	0.00480351	0.56599	0.0331741
Meso	Li.CD8.DYS	-0.178558	0.0431571	-0.306286	0.0112234	-0.13755	0.0876861	-0.228352	0.0327289	0.0697153	0.202868
Endo	Caushi.CD8-Effector(2)	-0.117671	0.0906422	-0.111852	0.113166	-0.218666	0.00119702	-0.228016	0.000910087	0.30506	0.00535826
Meso	Oliveira_TET	-0.291013	0.00306896	-0.327295	0.0140467	-0.169815	0.0587788	-0.227533	0.0551809	0.0173154	0.161315
Endo	Caushi.CD8.Effector(II)	-0.0991086	0.140718	-0.107539	0.115545	-0.207545	0.00147381	-0.227365	0.000626267	0.3761	0.00601807
Endo	Oliveira_Tumor Spec_Pro_Exhaust	-0.0185864	0.853449	-0.0412409	0.684717	-0.186101	0.0566306	-0.226299	0.0217871	0.912352	0.0867156
Meso	Caushi.CD8-Effector(2)	-0.207734	0.00841725	-0.353061	0.0020024	-0.12471	0.0834252	-0.226296	0.0249972	0.0292097	0.200146
Endo	Oh.CD8.CD39	-0.0273309	0.72465	-0.0600708	0.443866	-0.191929	0.0107611	-0.223932	0.00330349	0.859061	0.0243367
Meso	Oh.CD4.GZMB	-0.187112	0.0261874	-0.34505	0.00301969	-0.0857138	0.26529	-0.223888	0.030895	0.0499941	0.386115
Endo	Caushi.CD4-Th(2)	-0.0752871	0.342608	-0.0927318	0.249688	-0.200337	0.00928883	-0.223708	0.00429086	0.56599	0.0220235
Meso	Caushi.CD4-Tfh(2)	-0.23853	0.0258892	-0.266827	0.068147	-0.210189	0.0319297	-0.222104	0.0866385	0.0499941	0.104304
Meso	Caushi.CD8.Effector(III)	-0.232806	0.00771959	-0.224579	0.0651786	-0.174519	0.029276	-0.217556	0.0439492	0.0291775	0.102466
Meso	Yost_CD8 Act/Exh	-0.200907	0.0334127	-0.356444	0.00662753	-0.0848172	0.325394	-0.21619	0.0631961	0.0598984	0.430928
Meso	Oliveira_Tumor Spec_EM	-0.297541	0.00822603	-0.339651	0.0321464	-0.155982	0.129608	-0.215354	0.126735	0.0292097	0.235214
Meso	Mel_Exhaust_Tirosh	-0.31719	0.000330773	-0.341607	0.00530053	-0.204488	0.0113577	-0.213727	0.0495117	0.00492596	0.0596278
Meso	Caushi.CD8-TRM(2)	-0.227434	0.0101816	-0.312733	0.0118935	-0.127001	0.115941	-0.213724	0.0517403	0.031181	0.229546
Endo	Grog.8Trm.3	-0.07595	0.182848	-0.0737195	0.206298	-0.191644	0.000533392	-0.213286	0.000171816	0.419698	0.00403502
Meso	Krishna.ACT.CD8.Stem.Like	-0.245743	0.0142781	-0.174292	0.232984	-0.25438	0.00583076	-0.212717	0.0997603	0.0358012	0.0329662
Meso	Oh.CD4.GZMK	-0.254152	0.00246216	-0.370227	0.00185339	-0.132852	0.0833227	-0.211091	0.0460987	0.0145825	0.200146
Endo	Lowery_NeoTCR4	-0.123134	0.136108	-0.142503	0.0889417	-0.183863	0.0216862	-0.210251	0.00975456	0.370516	0.0414009
Endo	Exhaust_3_Feldman	-0.114682	0.0692841	-0.110169	0.0853496	-0.191572	0.00173474	-0.210112	0.000735703	0.275264	0.00671071
Endo	Caushi.CD8.TRM(II)	-0.0284348	0.719497	-0.0723524	0.36337	-0.182464	0.0177814	-0.20922	0.00695703	0.859061	0.0353925
Meso	TOX_Scott	0.103877	0.365427	-0.369788	0.030429	0.257414	0.0152902	-0.208715	0.173703	0.416417	0.0702395
Meso	Caushi.CD8.Effector(I)	-0.244341	0.0146758	-0.269289	0.0597049	-0.142925	0.117937	-0.208181	0.096794	0.0359113	0.229546
Meso	Caushi.CD8.TRM(IV)	-0.280683	0.000229141	-0.306973	0.00540041	-0.215785	0.00189847	-0.20685	0.0344308	0.00421047	0.0133564
Endo	Oh.CD8.XCL	-0.114767	0.126204	-0.0626083	0.416766	-0.221863	0.00225625	-0.205865	0.00588203	0.356769	0.00753792
Endo	Grog.8EM	-0.096514	0.0913105	-0.0805097	0.167309	-0.201757	0.000272831	-0.203133	0.000341468	0.30506	0.00403502
Meso	Caushi.CD8.TRM(VI)	-0.214828	0.0153297	-0.276926	0.0227808	-0.134486	0.0992183	-0.200634	0.0644895	0.0359113	0.211378
Meso	Jansen_Stem like	-0.389755	0.000139288	-0.148394	0.320177	-0.433819	3.33521e-06	-0.199417	0.130352	0.00292504	5.44751e-05
Endo	Oliveira_EMT	-0.0590689	0.480286	-0.0778394	0.360117	-0.176817	0.0292828	-0.198845	0.016054	0.665537	0.0518623
Meso	Zheng_TREG	-0.300834	0.0142736	-0.284166	0.0998188	-0.16621	0.141088	-0.198295	0.197283	0.0358012	0.243999
Meso	Caushi.CD8-Effector(1)	-0.239893	0.0151935	-0.319185	0.0252833	-0.133551	0.138635	-0.196477	0.118922	0.0359113	0.243999
Endo	Caushi.CD4-Tfh(2)	-0.0197258	0.828263	-0.0552612	0.544648	-0.172396	0.0510099	-0.195864	0.0274573	0.912352	0.0797709
Endo	Grog.Treg.1	-0.0334632	0.615127	-0.0592629	0.387408	-0.134854	0.0360746	-0.194971	0.00336585	0.772804	0.0616624
Meso	Guo_Exhau CD8	-0.189574	0.0411036	-0.456709	0.000510268	-0.00360613	0.966021	-0.194599	0.0938866	0.0678902	0.972638
Endo	Yost_CD8 Activated	0.0548277	0.547015	0.0503397	0.584351	-0.162397	0.0657332	-0.193688	0.0302156	0.717957	0.0996163
Ecto	Grog.CD4.IL6ST	-0.298729	0.00808966	-0.0576907	0.755788	-0.296556	0.00587112	-0.189703	0.32672	0.0566276	0.0539409
Meso	Lowery_NeoTCR4	-0.245519	0.00774097	-0.328702	0.0116947	-0.159216	0.0595028	-0.189675	0.101195	0.0291775	0.161315
Endo	Grog.8Trm.2	-0.0664093	0.254793	-0.0698997	0.242983	-0.170304	0.00258091	-0.189275	0.00112388	0.480187	0.00807222
Meso	Ghatalia_T Cell Inflation RCC	-0.179981	0.00137126	-0.295935	0.000136439	-0.12843	0.0127686	-0.188772	0.00625232	0.0125985	0.0625598
Meso	Oh.CD4.CXCL13	-0.302427	0.0117471	-0.249624	0.146933	-0.273624	0.0131929	-0.188226	0.212849	0.0332307	0.0625598
Meso	Caushi.CD8.TRM(V)	-0.22352	0.0200324	-0.34621	0.0117588	-0.0786719	0.371217	-0.186264	0.128229	0.0439517	0.478674
Meso	Caushi.CD8.Effector(II)	-0.201446	0.00773267	-0.357013	0.000966626	-0.0939032	0.174203	-0.186086	0.051514	0.0291775	0.281404
Meso	Oh.CD4.TH17	-0.243733	0.0213658	-0.213179	0.144349	-0.143026	0.140235	-0.184814	0.153913	0.0446657	0.243999
Meso	Chatani_TP	-0.171982	0.00197581	-0.242144	0.00170177	-0.119305	0.0191025	-0.181426	0.00827453	0.0145825	0.0850931
Meso	Caushi.CD4-Th(2)	-0.211847	0.0154271	-0.181561	0.138289	-0.181901	0.0234916	-0.17995	0.099934	0.0359113	0.0991422
Meso	LCMV_PROG.EX_Miller	-0.275928	0.0561773	-0.318372	0.131812	-0.193274	0.142971	-0.179218	0.336809	0.0851347	0.24438
Meso	Caushi.CD4-Tfh(1)	-0.378619	0.00248001	-0.222418	0.207661	-0.338191	0.00305655	-0.178475	0.251306	0.0145825	0.0204233
Endo	Yan_CD8 IFN Gamma	-0.0750505	0.125716	-0.0746058	0.136672	-0.164025	0.000565621	-0.177405	0.000275482	0.356769	0.00403502
Endo	Yan_TCS	-0.0750505	0.125716	-0.0746058	0.136672	-0.164025	0.000565621	-0.177405	0.000275482	0.356769	0.00403502
Endo	Liu_Treg	-0.159427	0.0351053	-0.128297	0.102714	-0.163018	0.0259316	-0.176567	0.0208229	0.208857	0.047061
Meso	Grog.8Trm.3	-0.135959	0.0318733	-0.297937	0.000823057	-0.080377	0.165458	-0.172263	0.0295298	0.0578441	0.273284
Endo	Guo_Exhau CD4	-0.0304247	0.699754	-0.0542539	0.495829	-0.157692	0.0398922	-0.172207	0.0264922	0.843146	0.0651572
Meso	Grog.8EFF	-0.16483	0.0120219	-0.263534	0.00354554	-0.095093	0.114099	-0.171342	0.0343022	0.0333439	0.229546
Endo	Oh.CD4.Activate	0.0222733	0.791219	0.0458491	0.591756	-0.164338	0.0444555	-0.170892	0.0398398	0.901621	0.0710321
Meso	Grog.8EM	-0.193789	0.00242342	-0.31869	0.000522742	-0.110183	0.0594459	-0.170505	0.036187	0.0145825	0.161315
Endo	Chen_Recurrent Papillary Thyroid	-0.134156	0.012037	-0.0982918	0.0719169	-0.191154	0.000221412	-0.167578	0.00157965	0.130003	0.00403502
Meso	Exhaust_3_Feldman	-0.221219	0.00177278	-0.253052	0.00903651	-0.143693	0.0266936	-0.16756	0.0531404	0.0144777	0.0991422
Meso	Oliveira_TM	-0.271326	0.0307964	-0.0808682	0.672949	-0.172931	0.132192	-0.167359	0.323895	0.0573047	0.236979
Endo	Caushi.CD8-MHCII	0.0194804	0.775882	-0.0196101	0.778575	-0.131686	0.0470201	-0.166538	0.0140167	0.891053	0.0743221
Endo	Ghatalia_T Cell Inflation RCC	-0.0931369	0.0591933	-0.0905247	0.0715536	-0.156232	0.00107592	-0.166095	0.000659236	0.241706	0.00527202
Meso	Grog.8Trm.2	-0.122305	0.0571353	-0.250606	0.00501923	-0.0695638	0.238655	-0.165761	0.0375256	0.0857029	0.357983
Endo	Hanada_Reactive T Cell NSCLC	-0.0549077	0.413683	-0.0784055	0.252583	-0.14449	0.0263902	-0.165636	0.012906	0.59933	0.0473093
Endo	Grog.8chrom	-0.0917803	0.224457	-0.0607356	0.42796	-0.166921	0.0226621	-0.165262	0.0266226	0.453947	0.0425881
Meso	Mem_Eff_6_Feldman	-0.349564	3.49576e-05	-0.116505	0.351056	-0.334216	1.38746e-05	-0.163254	0.136418	0.00171292	0.000169964
Meso	Guo_Exhau CD4	-0.193389	0.0397686	-0.222873	0.102179	-0.139113	0.106155	-0.161068	0.178653	0.0664317	0.219787
Endo	Chatani_TP	-0.117189	0.0188789	-0.122003	0.0156879	-0.154869	0.00135303	-0.159945	0.00108766	0.17345	0.00568271
Meso	Duhen_Tumor React CD8	-0.165656	0.00249835	-0.178449	0.0193059	-0.11098	0.0270007	-0.15536	0.0222414	0.0141253	0.0968075
Meso	CD8_B_Feldman	-0.219898	0.0156349	-0.440619	0.000527098	0.0308357	0.711421	-0.154953	0.171228	0.0359113	0.76335
Meso	Grog.8chrom	-0.191091	0.025544	-0.211172	0.0745714	-0.171294	0.028882	-0.154337	0.149614	0.0499941	0.102466
Endo	Zou_Immune Rxn HCC	-0.0310223	0.68712	-0.0338904	0.665171	-0.142966	0.0552369	-0.153775	0.0431132	0.834766	0.0854718
Meso	Guo_Supp Treg	-0.276971	0.0131736	-0.360247	0.0219786	-0.0444907	0.665232	-0.149525	0.288918	0.0345807	0.724364
Meso	Yuan_Hypoxia	-0.270534	0.000404445	-0.233283	0.028363	-0.0892003	0.203392	-0.149314	0.11642	0.00495446	0.324985
Meso	Oh.CD8.Naive	-0.262995	0.00854434	-0.232113	0.0939367	-0.144756	0.11447	-0.148996	0.2278	0.0292097	0.229546
Meso	Dai_Activation CD4 CD8	0.190691	0.0123025	-0.19357	0.074625	0.283849	5.593e-05	-0.145293	0.135021	0.0334902	0.000632439
Meso	Oliveira_Pro_Exhaust	-0.273655	0.0420435	-0.377334	0.0587492	-0.0536432	0.663989	-0.145132	0.411341	0.0686711	0.724364
Meso	Zou_Immune Rxn HCC	-0.267561	0.00203899	-0.252591	0.0281962	-0.13568	0.0883236	-0.141789	0.170085	0.0145825	0.202868
Endo	Duhen_Tumor React CD8	-0.113901	0.0207799	-0.0981423	0.0494182	-0.155437	0.00111312	-0.138846	0.00408978	0.183113	0.00532959
Meso	LCMV_TERMN.EX_Miller	-0.281397	0.0224382	-0.141545	0.413642	-0.137887	0.220746	-0.138383	0.369843	0.0458113	0.338018
Meso	Qi_TREG	-0.108387	0.0518041	-0.213801	0.00471449	-0.0344335	0.499522	-0.136947	0.0415608	0.0801601	0.592175
Endo	Grog.8Trm.1	-0.0358228	0.603315	0.00835568	0.90441	-0.159805	0.016719	-0.136172	0.0439912	0.770362	0.0341345
Meso	Oh.CD4IL2RALO	-0.206316	0.034757	-0.310116	0.0206386	-0.0739269	0.409436	-0.135896	0.255732	0.061235	0.51006
Endo	Qi_TREG	-0.0634363	0.197001	-0.0877198	0.07843	-0.107856	0.0228875	-0.134984	0.00506632	0.419698	0.0425881
Meso	Oh.TIL_CD4IL2RALO	-0.189794	0.0214806	-0.335079	0.00376441	-0.00920894	0.903169	-0.130125	0.208501	0.0446657	0.934971
Meso	Yan_TCS	-0.144987	0.00959424	-0.254859	0.00102605	-0.0855876	0.0945915	-0.128511	0.0618911	0.0306599	0.204553
Meso	Yan_CD8 IFN Gamma	-0.144987	0.00959424	-0.254859	0.00102605	-0.0855876	0.0945915	-0.128511	0.0618911	0.0306599	0.204553
Meso	Oliveira_Tumor Spec_AAT	-0.273978	0.0193807	-0.327424	0.0465845	-0.0746282	0.486744	-0.12206	0.406265	0.043166	0.586504
Endo	Oh.CD8.RPL	-0.0600812	0.260033	-0.0415947	0.447573	-0.12196	0.0178166	-0.118438	0.0252098	0.483858	0.0353925
Endo	CD3.MT	-0.117292	0.0575251	-0.0529549	0.404727	-0.15312	0.0106605	-0.116562	0.0586884	0.241706	0.0243367
Meso	Bao_MSI vs. MSS	-0.158103	0.0250411	-0.211856	0.0251799	-0.0647224	0.314167	-0.116347	0.165756	0.0497438	0.424983
Endo	Grog.CD4.RPL32	-0.0424324	0.402389	-0.0369785	0.479392	-0.101589	0.0379343	-0.113683	0.0245952	0.594236	0.0626555
Meso	Grog.CD4.IL6ST	-0.205724	0.0179757	-0.232304	0.0491218	-0.0992257	0.214558	-0.113453	0.280103	0.0406527	0.332102
Meso	KH_sig	-0.25427	0.00524659	-0.196322	0.128913	-0.139934	0.0916335	-0.109474	0.339272	0.0239376	0.204553
Endo	Grog.CD4.TCF7	-0.0374111	0.466884	-0.0218952	0.678879	-0.10367	0.0366901	-0.104017	0.0418309	0.653638	0.0619937
Meso	Guo_Activated Treg	-0.197215	0.0374338	-0.327775	0.0164013	0.0258226	0.766315	-0.0739724	0.544205	0.0639856	0.816292
Meso	Jansen_Term diff	0.0483636	0.723836	-0.30193	0.160947	0.277473	0.026524	-0.0716826	0.709481	0.754637	0.0991422
Ecto	Grog.8KLRB1	-0.326494	0.000301404	0.0434161	0.796522	-0.247456	0.00405702	-0.0594077	0.73621	0.0101449	0.0445153
Meso	Early.Act_5_Feldman	-0.182557	0.08616	0.0537966	0.738554	-0.247265	0.0104427	-0.0458346	0.744151	0.121784	0.0568548
Meso	Grog.8KLRB1	-0.203117	0.0076188	-0.149306	0.163838	-0.0819749	0.2414	-0.038258	0.69163	0.0291775	0.358443
Meso	Oh.CD4.CM	-0.379186	0.00124477	-0.142359	0.388513	-0.20048	0.062896	-0.0363214	0.806262	0.0121987	0.165102
Ecto	Oh.CD8.CM	-0.493262	0.00155857	0.376108	0.137767	-0.532182	0.000355349	-0.0353751	0.89318	0.0208281	0.0117565
Meso	Oh.TIL_CD4.GZMK	-0.192337	0.0280964	-0.275031	0.0231407	0.00878992	0.91325	-0.028905	0.790742	0.0529509	0.935726
Meso	Oliveira_Tumor Spec_Prolif T	0.126303	0.232823	-0.339461	0.0213882	0.433462	9.2622e-06	-0.00603217	0.964005	0.290042	0.000136154
Meso	Caushi.CD8-Proliferating	0.201139	0.0373457	-0.326771	0.0142296	0.460145	2.74298e-07	-0.00417118	0.972708	0.0639856	5.04022e-06
Ecto	Dai_Activation CD4 CD8	0.261516	0.00411544	0.134902	0.348313	0.117027	0.174189	0.0194069	0.897211	0.0355865	0.398837
Meso	Grog.8Mit	-0.00484311	0.950341	-0.220517	0.0368538	0.207514	0.00355585	0.0242113	0.798436	0.963449	0.0227265
Meso	Oh.CD8.MAIT	-0.202465	0.0349914	-0.0807735	0.550497	-0.0558337	0.526242	0.0255503	0.832645	0.061235	0.613949
Meso	Oh.CD4.PROLIF	0.231651	0.001581	-0.145919	0.144722	0.415766	8.95467e-10	0.0407466	0.653127	0.013671	2.63267e-08
Meso	Mem_Eff_4_Feldman	-0.237915	0.0212123	0.117348	0.453206	-0.23648	0.0119793	0.0431394	0.754247	0.0446657	0.0607228
Meso	Krishna.ACT.CD8.Term.Diff	0.224928	0.00655705	-0.192854	0.0967254	0.451277	3.8891e-09	0.0432426	0.682036	0.0275396	9.5283e-08
Meso	Mo_Hypoxia	0.148192	0.0235895	0.0580452	0.514352	0.133561	0.0268986	0.0513455	0.521403	0.0475022	0.0991422
Ecto	Oh.CD8.RPL	-0.226474	0.00131993	0.0530278	0.652514	-0.131606	0.0510798	0.0566281	0.648884	0.0194029	0.224812
Meso	Oliveira_Prolif_T	0.272246	8.15929e-05	-0.0962639	0.317129	0.423243	4.02372e-11	0.0599889	0.49398	0.00244503	2.16347e-09
Meso	Exhaust_1_Feldman	0.255395	9.9797e-05	-0.0880538	0.340626	0.400774	4.41525e-11	0.0658327	0.435197	0.00244503	2.16347e-09
Meso	Caushi.CD8.Proliferating	0.205363	0.0391528	-0.256092	0.0612055	0.492868	9.63397e-08	0.0666113	0.593055	0.0661548	2.02313e-06
Meso	Yang_Cuproptosis	0.227973	0.0143692	0.244613	0.0603894	0.184033	0.0309135	0.0699333	0.551289	0.0358012	0.103279
Ecto	Grog.CD4.RPL32	-0.197585	0.00336843	0.0703573	0.530817	-0.0995643	0.122887	0.0772201	0.514009	0.0309475	0.347393
Ecto	Oh.CD8.MAIT	-0.394337	0.000898288	0.165515	0.432991	-0.265643	0.0196396	0.0851414	0.700815	0.014672	0.120292
Meso	Oh.CD8.PRO	0.261434	8.41263e-05	-0.0799997	0.39062	0.423415	6.69085e-12	0.0873664	0.303011	0.00244503	9.83555e-10
Ecto	Grog.CD4.TCF7	-0.210649	0.00214416	0.0906687	0.429626	-0.10151	0.122596	0.09205	0.445666	0.0217793	0.347393
Endo	Mo_Hypoxia	0.245676	1.90852e-05	0.208947	0.000361882	0.140045	0.0111462	0.0942609	0.0944593	0.000701381	0.0248255
Endo	Liu_Hypoxia	0.429458	1.84901e-05	0.297688	0.0033636	0.227386	0.0191065	0.0999239	0.310127	0.000701381	0.0374488
Meso	Oh.CD8.CM	-0.235124	0.0444818	0.0793927	0.640383	-0.0936411	0.382583	0.104719	0.488565	0.0703099	0.489041
Endo	Hou_T Cell Prolif	0.320704	1.6944e-05	0.277934	0.000305726	0.1263	0.0797706	0.105535	0.15709	0.000701381	0.116102
Endo	Exhaust_1_Feldman	0.118369	0.0328484	0.135527	0.0193967	0.138881	0.00982363	0.120699	0.031485	0.208857	0.0229218
Endo	Oh.CD4.PROLIF	0.102761	0.0906938	0.12327	0.0525291	0.142967	0.0152412	0.122158	0.0471459	0.30506	0.0329478
Meso	Liu_Hypoxia	0.212771	0.0535885	0.237179	0.122212	0.315726	0.00190805	0.126157	0.354369	0.0820573	0.0133564
Endo	Oliveira_Prolif_T	0.114838	0.0471173	0.131095	0.0306853	0.149342	0.00785592	0.126619	0.0312651	0.231194	0.02026
Endo	Oh.CD8.PRO	0.110601	0.0495287	0.127644	0.0302887	0.146972	0.00721977	0.129147	0.0238707	0.234862	0.0196538
Ecto	An_CervicalCA	0.362561	0.000233249	0.404893	0.0236245	0.35534	0.000154809	0.158016	0.395057	0.0101449	0.0113785
Endo	An_CervicalCA	0.335665	5.25956e-06	0.316728	2.40962e-05	0.189664	0.00758389	0.163514	0.0243428	0.000701381	0.0201905
Ecto	Caushi.CD4-Th(3)	0.33109	0.0060268	0.418104	0.0404614	0.2345	0.0389983	0.235463	0.264108	0.0466284	0.191091
Ecto	Oliveira_Prolif_T	0.269911	0.000347607	0.181118	0.196875	0.261641	0.000265215	0.276525	0.0603948	0.0101449	0.0117565
Ecto	Exhaust_1_Feldman	0.246231	0.000654534	0.173517	0.196805	0.239994	0.000479855	0.277988	0.0490583	0.0120271	0.0117565
Ecto	Oh.CD8.PRO	0.255348	0.000466607	0.197955	0.144284	0.244639	0.000416294	0.288291	0.0421186	0.0101449	0.0117565
Ecto	Oh.CD4.PROLIF	0.247818	0.0019824	0.190696	0.183147	0.23577	0.00191474	0.295793	0.0479621	0.0217793	0.0281467
Ecto	Caushi.CD8-Proliferating	0.394819	0.000381608	0.383998	0.0521604	0.281335	0.00744071	0.373408	0.0707612	0.0101449	0.0643403
Ecto	Krishna.ACT.CD8.Term.Diff	0.288906	0.00222238	0.309192	0.0742838	0.255689	0.00423955	0.373556	0.038589	0.0217793	0.0445153
Ecto	Caushi.CD8.Proliferating	0.398738	0.000483092	0.363941	0.0823734	0.341757	0.00155421	0.451102	0.0390143	0.0101449	0.0281467
Ecto	Liu_Hypoxia	0.564836	4.64781e-05	0.725194	0.000406018	0.432415	0.00101573	0.551615	0.0102195	0.00683228	0.0213304

## Sheet: Supp T5
Signature Name	Oh.CD8.CM	Zhang CD8 TCS	Caushi.Stem-like memory	Oh.CD4.CM
Gene Name	SELL	AGMAT	SELL	CCR7
	CCR7	AMIGO1	CCR7	PLAC8
	RNF125	AQP3	S1PR1	CMTM8
	YBX3	ATP8B2	KLF3	SH3YL1
	CNOT6L	BEX5	TCF7	C1orf162
	EZR	CD69	GPR183	ANXA1
	RGCC	DVL3	SC5D	SPINT2
	RNF19A	EPHX2	FAAH2	CD55
	AIM1	GPRASP1	LTB	SESN3
	CREM	HEMGN	SESN3	MYC
	GZMK	IL7R	MAL	PGAP1
	PDCD4	LRRN3	PASK	PABPC1
	SMCHD1	MAL	TSHZ2	SC5D
	EEF1B2	MGP	LEF1	BEX2
	S1PR4	NR3C2	AP3M2	KLF3
	LMNA	PPP1R13B	SLC2A3	LEF1
	DDX21	SMAGP	ICAM2	PASK
	GLTSCR2	STRN4	PLAC8	PTGER2
	KLF2	TCEA3	SCML1	AP3M2
	ARID5A	ZNF540	IL7R	SOCS3
	CHD1		ABLIM1	AIM1
	FAM177A1		RASGRP2	EEF1B2
	BAZ1A		TRABD2A	AAED1
	DUSP2		SATB1	SNAPC1
	KTN1		ALG13	KLF2
	ETS1		ARID5A	SELL
	DDX3X		BACH2	EEF1A1
	SKIL		PABPC1	ARID5A
	PABPC1		GPCPD1	RPS12
	PDE4B		NELL2	LSR
	TMEM66		TAF4B	TCF7
	GPR183		FCMR	GLTSCR2
	MCL1		ARRDC2	TMEM66
	MT-ND2		C1orf162	PTGER4
	TSPYL2		FAM177A1	RASGRP2
	YPEL5		ANKRD12	RPL10
	GSPT1		TXK	GPR183
	MT-ND1		SORL1	GIMAP7
	SELK		AQP3	RPS3A
	RPLP0		ADTRP	RPS13
	EIF4G2		FXYD7	RPL3
	TGFB1		CD28	RNF125
	CD55		P2RY8	SLC2A3
	EIF4A3		CRYBG1	RPL9
	PIK3R1		TNFSF8	RPS5
	RSL1D1		BEX2	RPL21
	IDI1		PGAP1	MBP
	RPS12		PTGER4	GIMAP5
	RSL24D1		MAML2	CCDC109B
	SLC7A5		BEX3	RPL30
	CRYBG1		PCSK1N	MCUB
	NOP53		INPP4B	CRYBG1
	SELENOK		AC119396.1	NOP53
			CXCR5	PRXL2C
			LINC00402
			CCR4
			IL6R
			ZBTB10
			ITGA6
			ARMH1
			RILPL2
			FOXP1
			TESPA1
			YPEL5
			LPAR6
			CMSS1
			RIPOR2
			ZNF331
			EMP3
			GIMAP7
			WDR74
			RIC3
			CYSLTR1
			ITGB1
			CD5
			SAMHD1
			SERINC5

## Sheet: Supp T6
Tumor Histology	Signature	OS Coef	OS Pvalue	OSq	PF Coef	PF Pvalue	PFq
ACC	Zhang CD8 TCS	-3.34056	4.82561e-05	0.000782821	-2.38948	0.000287054	0.00159247
ACC	Caushi.Stem-like memory	-2.94932	0.00144769	0.0117424	-2.39157	0.000565664	0.00236527
ACC	Jansen_Stem like	-2.89192	0.000665518	0.00647771	-3.30626	6.12961e-06	0.000223731
ACC	Yost_Naive	-2.53147	0.00113563	0.00975309	-2.63865	2.14547e-05	0.000313238
ACC	B16_PROG.EX_Miller	-2.50333	0.0170829	0.0658923	-2.50792	0.00241492	0.0058763
ACC	Caushi.CD8.Stem-like memory	-2.46053	0.0189428	0.0691411	-2.09938	0.00981298	0.0172614
ACC	Oh.CD4.CXCL13	-2.38307	0.00387374	0.0269317	-2.83028	7.67708e-05	0.000622697
ACC	Caushi.CD4CD8(I)	-2.29714	0.00215877	0.0157591	-2.45273	5.82967e-05	0.000567421
ACC	Caushi.CD8.CD4CD8(I)	-2.29714	0.00215877	0.0157591	-2.45273	5.82967e-05	0.000567421
ACC	Zheng_TREG	-2.29682	0.00911541	0.0492908	-2.43191	0.000821288	0.00309082
ACC	Mem_Eff_6_Feldman	-2.18725	0.000166155	0.00202155	-2.24711	2.40632e-06	0.000166767
ACC	Ahuluwalia_Prognostic Cell Death	-2.13492	0.000909717	0.00830117	-2.37668	1.34626e-05	0.000245692
ACC	Oh.CD4.TH17	-2.01051	0.0147631	0.0615834	-2.14832	0.0016015	0.00427734
ACC	Caushi.CD4-Tfh(1)	-1.92674	0.014266	0.0615834	-2.10311	0.000940345	0.00317321
ACC	Caushi.CD4CD8(II)	-1.89687	0.00657848	0.041298	-2.29995	9.27585e-05	0.000677137
ACC	Caushi.MAIT	-1.63725	0.0546121	0.134413	-1.60949	0.0200905	0.0318827
ACC	Caushi.CD8.CD4CD8(II)	-1.89687	0.00657848	0.041298	-2.29995	9.27585e-05	0.000677137
ACC	Caushi.CD8.MAIT	-1.87596	0.0477794	0.129181	-2.51317	0.00161133	0.00427734
ACC	Oliveira_Pro_Exhaust	-1.52475	0.106556	0.185204	-1.86128	0.0151342	0.024551
ACC	Oh.CD4IL2RAHI	-1.47376	0.0612369	0.146235	-2.07168	0.0028029	0.00660037
ACC	Caushi.CD4-Th(1)	-1.85804	0.00761407	0.0427559	-1.77205	0.00119761	0.00342844
ACC	Caushi.CD4-Tfh(2)	-1.8511	0.0121886	0.0574043	-2.59694	7.35977e-05	0.000622697
ACC	Oh.CD8.Naive	-1.39792	0.0654006	0.149195	-1.44458	0.0182464	0.0292745
ACC	Exhaust_2_Feldman	-1.80973	0.0174725	0.0658923	-2.29583	0.000288141	0.00159247
ACC	Caushi.CD4-Treg	-1.78014	0.0176014	0.0658923	-2.23248	0.000409568	0.00206196
ACC	Caushi.CD8.TRM(I)	-1.28179	0.0923532	0.177415	-1.32824	0.0298239	0.0439828
ACC	LCMV_TERMN.EX_Miller	-1.73286	0.0169166	0.0658923	-1.95573	0.00114037	0.00339784
ACC	Guo_Supp Treg	-1.27737	0.103449	0.182786	-1.93521	0.00488561	0.01019
ACC	Wang_OS Benefit	-1.23494	0.0971809	0.177737	-1.53618	0.0120952	0.020067
ACC	Guo_Exhau CD4	-1.69265	0.0107935	0.0525286	-2.33212	6.49394e-05	0.000592572
ACC	Zheng_Exhau T Cell	-1.68234	0.0101057	0.0525286	-2.02225	0.000200614	0.00127347
ACC	Caushi.CD8.TRM(VI)	-1.64795	0.0127598	0.0582168	-1.67235	0.00119258	0.00342844
ACC	Oliveira_TET	-1.10046	0.0876846	0.170693	-1.76805	0.00137842	0.00387017
ACC	Oliveira_Tumor Spec_AAT	-1.08884	0.162747	0.250117	-1.7809	0.00779274	0.0144018
ACC	Lowery_NeoTCR4	-1.06194	0.0777945	0.160107	-1.74514	0.000932784	0.00317321
ACC	Wu_OS Pancreatic CA	-1.05612	0.0695874	0.154607	-1.19157	0.0112752	0.0191416
ACC	Yost_CD8 Act/Exh	-1.04728	0.0837372	0.165211	-1.41821	0.0052405	0.010481
ACC	Caushi.CD8-TRM(2)	-1.04047	0.0958226	0.177737	-1.43856	0.00578719	0.011418
ACC	Oh.CD4.GZMB	-1.02359	0.0631012	0.146235	-1.43811	0.00166131	0.00433127
ACC	Caushi.CD8.TRM(II)	-1.00679	0.13016	0.210226	-1.43283	0.0111453	0.0191416
ACC	Oliveira_Tumor Spec_TET	-1.0028	0.131031	0.210226	-1.72369	0.00291947	0.00676574
ACC	Li.CD8.DYS	-0.992583	0.0698907	0.154607	-1.6568	0.000567018	0.00236527
ACC	Hanada_Reactive T Cell NSCLC	-0.973263	0.103913	0.182786	-1.46946	0.00404732	0.00897364
ACC	Krishna.ACT.CD8.Stem.Like	-0.952623	0.256339	0.33439	-2.016	0.00627909	0.0120625
ACC	Yost_CD8_Memory	-0.950193	0.0827146	0.165211	-1.51459	0.00108439	0.00336853
ACC	Oh.CD4.MITO	-1.60413	0.000120313	0.00159688	-1.61413	2.88898e-06	0.000166767
ACC	Caushi.CD8-Effector(2)	-0.934633	0.0740287	0.160107	-1.38198	0.00201044	0.00506077
ACC	Caushi.CD8-MHCII	-0.933683	0.053192	0.133897	-1.41963	0.000851461	0.00310783
ACC	Grog.8chrom	-0.929017	0.130213	0.210226	-1.14723	0.023816	0.0373886
ACC	Oliveira_Tumor Spec_Pro_Exhaust	-0.918582	0.206344	0.281554	-1.68812	0.00842274	0.0153715
ACC	Grog.CD4.IL6ST	-0.830707	0.168493	0.254504	-1.45189	0.0051309	0.0104043
ACC	Grog.8EM	-0.801155	0.0630965	0.146235	-1.00678	0.00416171	0.0090688
ACC	Caushi.CD8-TRM(1)	-0.772918	0.180282	0.263812	-1.05694	0.0258753	0.0389463
ACC	Guo_Exhau CD8	-0.753225	0.238222	0.317394	-1.52474	0.00503441	0.0103525
ACC	Zou_Immune Rxn HCC	-0.742768	0.130009	0.210226	-1.45676	0.000335676	0.00175031
ACC	Grog.8Trm.2	-0.734481	0.0771365	0.160107	-1.19885	0.000613978	0.00249002
ACC	Grog.8EFF	-0.700491	0.0779379	0.160107	-0.963528	0.00329682	0.00752088
ACC	Oliveira_Tumor Spec_EM	-0.691295	0.335003	0.414324	-1.27615	0.0345655	0.0494762
ACC	Caushi.CD8.Effector(II)	-0.664134	0.169089	0.254504	-1.11376	0.00729035	0.013646
ACC	Oh.CD8.FGFBP2	-0.641413	0.282966	0.359244	-1.05861	0.0305341	0.044211
ACC	Oh.TIL_CD4IL2RAHI	-0.623914	0.259074	0.334733	-1.03909	0.0255456	0.0389463
ACC	Oh.TIL_CD4.GZMB	-0.616259	0.298912	0.373001	-1.28129	0.0105366	0.0183136
ACC	Yan_TCS	-0.605871	0.0789571	0.160107	-0.972714	0.00095631	0.00317321
ACC	Yan_CD8 IFN Gamma	-0.605871	0.0789571	0.160107	-0.972714	0.00095631	0.00317321
ACC	Grog.Treg.1	-0.601025	0.182588	0.263812	-0.940144	0.0125944	0.0206604
ACC	Grog.8Trm.3	-0.586191	0.125345	0.210226	-0.967724	0.00272391	0.00651951
ACC	Oh.CD8.CD39	-0.551967	0.337702	0.414324	-1.32676	0.00861497	0.0155282
ACC	CD3.MT	-0.544251	0.197175	0.274167	-1.11521	0.0015462	0.00425933
ACC	Ghatalia_T Cell Inflation RCC	-0.520075	0.142219	0.223269	-0.803211	0.00616845	0.0120079
ACC	Grog.Treg.2	-0.506566	0.287983	0.362461	-1.01977	0.0114553	0.0192239
ACC	Qi_TREG	-0.270897	0.418248	0.496457	-0.607987	0.0305843	0.044211
ACC	Hou_T Cell Prolif	-0.199376	0.714564	0.767105	-1.05642	0.0258226	0.0389463
ACC	An_CervicalCA	0.863892	0.0977933	0.177737	0.969462	0.0265741	0.0395901
ACC	Mel_Exhaust_Tirosh	-1.52599	0.0107019	0.0525286	-1.85213	0.000294498	0.00159247
ACC	Caushi.CD4-Th(2)	-1.40952	0.00708646	0.041385	-1.53853	0.000480765	0.00228164
ACC	Oh.CD8.MITO	-1.40333	0.000200688	0.00225388	-1.45376	3.42673e-06	0.000166767
ACC	Yost_CD8 Exh	-1.39748	0.0415506	0.125399	-1.93774	0.000807602	0.00309082
ACC	Oh.CD4IL2RALO	-1.39063	0.0436338	0.125399	-2.13212	0.000508155	0.00231846
ACC	Oliveira_EMT	-1.36917	0.04285	0.125399	-1.59693	0.00405658	0.00897364
ACC	Lowery_NeoTCR8	-1.36336	0.0444905	0.125399	-1.93502	0.0010271	0.00333235
ACC	Caushi.CD8-Effector(3)	-1.27864	0.0301744	0.0937332	-1.46159	0.00230248	0.00569766
ACC	Yost_CD8 Eff mem	-1.24732	0.0295998	0.0937332	-1.54335	0.00111536	0.00339256
ACC	Oh.CD4.GZMK	-1.22278	0.0242084	0.0841529	-1.57575	0.000534296	0.00236385
ACC	Caushi.CD8.TRM(V)	-1.22057	0.0476491	0.129181	-1.73991	0.0010745	0.00336853
ACC	Caushi.CD8.Effector(III)	-1.17824	0.0446626	0.125399	-1.34473	0.00472014	0.00998755
ACC	Caushi.CD8.TRM(IV)	-1.13412	0.0144033	0.0615834	-1.50157	0.000185549	0.00123137
ACC	Bao_MSI vs. MSS	-1.12405	0.0298517	0.0937332	-1.31979	0.00193386	0.0049534
ACC	Exhaust_3_Feldman	-1.06186	0.0221215	0.0787742	-1.60456	0.000128948	0.000896498
ACC	Grog.8Trm.1	-1.02385	0.0490299	0.130152	-1.15585	0.00654802	0.0124157
ACC	Yuan_Hypoxia	-0.943991	0.0255767	0.086842	-1.35915	0.000226543	0.00137813
ACC	Zhang_CD8 Infiltration	1.26095	0.0267537	0.0887736	1.43078	0.00449086	0.00964214
ACC	Mo_Hypoxia	1.38107	0.000422193	0.00440287	1.35384	1.13757e-05	0.000237602
ACC	Exhaust_1_Feldman	2.06091	3.78482e-06	8.59943e-05	1.34517	2.08578e-05	0.000313238
ACC	Oh.CD8.PRO	2.26679	1.81408e-06	8.16871e-05	1.48037	8.33912e-06	0.000237602
ACC	Oliveira_Prolif_T	2.27335	2.44299e-06	8.16871e-05	1.47151	1.13919e-05	0.000237602
ACC	Oh.CD4.PROLIF	2.30429	2.7975e-06	8.16871e-05	1.52355	2.45417e-05	0.000325735
ACC	Grog.8Mit	2.34333	0.000104165	0.00152081	1.22435	0.00929869	0.0165562
ACC	Krishna.ACT.CD8.Term.Diff	2.7063	4.12301e-06	8.59943e-05	1.82474	4.07073e-05	0.000457175
ACC	Oliveira_Tumor Spec_Prolif T	3.59678	7.3107e-06	0.00013342	1.97452	0.000825631	0.00309082
ACC	Caushi.CD8-Proliferating	3.62596	1.13067e-06	8.16871e-05	1.82089	0.000484457	0.00228164
ACC	Caushi.CD8.Proliferating	4.00404	4.23903e-07	6.18899e-05	2.13244	4.05728e-05	0.000457175
BLCA	Tang_Ferroptosis	-1.24705	0.000695187	0.0507486	-1.31438	0.000465614	0.0339899
BLCA	Hou_T Cell Prolif	1.04717	2.58267e-08	3.7707e-06	0.791339	1.58083e-05	0.00230801
BRCA	Oh.CD8.CM	-0.715123	0.0405866	0.189249	-0.992114	0.00403965	0.0614287
BRCA	Zhang CD8 TCS	-0.712629	0.0173072	0.189249	-0.92539	0.00218514	0.0614287
BRCA	LCMV_PROG.EX_Miller	-0.818982	0.0104764	0.189249	-0.914523	0.00374844	0.0614287
BRCA	Oh.CD4.CM	-0.765343	0.0089858	0.189249	-0.881751	0.00273176	0.0614287
BRCA	B16_PROG.EX_Miller	-0.914328	0.000962026	0.105529	-0.845959	0.00190066	0.0614287
BRCA	Caushi.CD4-Tfh(1)	-0.602995	0.0531454	0.189249	-0.830437	0.00824369	0.0630321
BRCA	Caushi.Stem-like memory	-0.571669	0.033626	0.189249	-0.815352	0.00292375	0.0614287
BRCA	Caushi.CD8.Stem-like memory	-0.483584	0.0805741	0.217848	-0.715762	0.010366	0.0720683
BRCA	Caushi.CD4CD8(I)	-0.516025	0.0286078	0.189249	-0.696227	0.00337567	0.0614287
BRCA	Caushi.CD8.CD4CD8(I)	-0.516025	0.0286078	0.189249	-0.696227	0.00337567	0.0614287
BRCA	Yost_CD8 Activated	-0.704148	0.013411	0.189249	-0.689655	0.016158	0.087373
BRCA	Oliveira_AAT	-0.716881	0.0313859	0.189249	-0.684698	0.0431827	0.123877
BRCA	Jansen_Stem like	-0.544006	0.0232043	0.189249	-0.667139	0.00546968	0.0614287
BRCA	Grog.CD4.IL6ST	-0.755761	0.00144561	0.105529	-0.666225	0.0050167	0.0614287
BRCA	Zou_Immune Rxn HCC	-0.614437	0.0121471	0.189249	-0.660988	0.0071311	0.0630321
BRCA	Caushi.CD4-Th(1)	-0.530719	0.024142	0.189249	-0.658167	0.00515646	0.0614287
BRCA	Mem_Eff_6_Feldman	-0.445405	0.0223877	0.189249	-0.627743	0.00160683	0.0614287
BRCA	Guo_Exhau CD4	-0.375345	0.101405	0.228605	-0.623903	0.00728145	0.0630321
BRCA	Lowery_NeoTCR8	-0.552388	0.0497597	0.189249	-0.615118	0.0285579	0.10451
BRCA	Oh.CD8.Naive	-0.381261	0.166181	0.274869	-0.610509	0.0266616	0.10451
BRCA	Mem_Eff_4_Feldman	-0.402896	0.172231	0.274869	-0.609295	0.0405475	0.123877
BRCA	Mel_Exhaust_Tirosh	-0.436119	0.0521893	0.189249	-0.596757	0.00863453	0.0630321
BRCA	Oh.CD4.CXCL13	-0.522519	0.0723706	0.207179	-0.591638	0.0412219	0.123877
BRCA	Caushi.CD4-Th(2)	-0.577161	0.0135691	0.189249	-0.588382	0.011315	0.0750903
BRCA	Zheng_Exhau T Cell	-0.41836	0.112818	0.235305	-0.541554	0.0422866	0.123877
BRCA	Oh.CD8.MAIT	-0.679545	0.00403417	0.189249	-0.541084	0.0251112	0.10451
BRCA	Caushi.CD8.Effector(I)	-0.403424	0.103964	0.22998	-0.525891	0.0357331	0.121326
BRCA	Caushi.CD8.TRM(VI)	-0.479682	0.0360955	0.189249	-0.513854	0.0253181	0.10451
BRCA	Yost_CD8_Memory	-0.39379	0.0879117	0.221295	-0.508842	0.0286364	0.10451
BRCA	Caushi.CD8-Effector(1)	-0.386887	0.0850925	0.217956	-0.49504	0.0293487	0.10451
BRCA	Caushi.CD4CD8(II)	-0.368832	0.126233	0.238753	-0.48529	0.0452802	0.123877
BRCA	Caushi.CD8.CD4CD8(II)	-0.368832	0.126233	0.238753	-0.48529	0.0452802	0.123877
BRCA	Oliveira_EMT	-0.391854	0.093831	0.228322	-0.480499	0.039227	0.123877
BRCA	Grog.8Trm.1	-0.434843	0.0152215	0.189249	-0.471487	0.00855017	0.0630321
BRCA	Grog.8chrom	-0.389761	0.0443664	0.189249	-0.465863	0.0173134	0.0893191
BRCA	Oh.CD4.GZMK	-0.318356	0.124406	0.238753	-0.459559	0.0287789	0.10451
BRCA	Caushi.CD8-TRM(1)	-0.400305	0.0586812	0.196738	-0.455821	0.0321864	0.111886
BRCA	Oh.CD8.XCL	-0.412416	0.02399	0.189249	-0.450162	0.0146248	0.0834788
BRCA	Caushi.CD8-TRM(2)	-0.396312	0.067228	0.207179	-0.448049	0.0396198	0.123877
BRCA	Exhaust_3_Feldman	-0.318512	0.0675298	0.207179	-0.435178	0.0140796	0.0834788
BRCA	Caushi.CD8.TRM(IV)	-0.340333	0.0525094	0.189249	-0.420833	0.0177415	0.0893191
BRCA	Grog.8EM	-0.357597	0.021291	0.189249	-0.41308	0.00851635	0.0630321
BRCA	Caushi.CD8-Effector(2)	-0.329322	0.0697902	0.207179	-0.412259	0.0252701	0.10451
BRCA	Grog.8EFF	-0.314816	0.0528346	0.189249	-0.399731	0.0148661	0.0834788
BRCA	Grog.8KLRB1	-0.504624	0.00579278	0.189249	-0.399702	0.0289028	0.10451
BRCA	Grog.8Trm.2	-0.374745	0.0177287	0.189249	-0.396664	0.0127207	0.0807487
BRCA	Li_Pyroptosis	-0.356798	0.0369734	0.189249	-0.386545	0.0242235	0.10451
BRCA	Chen_Recurrent Papillary Thyroid	-0.104798	0.493987	0.595818	-0.306988	0.0485907	0.12446
BRCA	Chatani_TP	-0.259878	0.059291	0.196738	-0.302934	0.0286453	0.10451
BRCA	Ghatalia_T Cell Inflation RCC	-0.25887	0.0457502	0.189249	-0.289793	0.0268028	0.10451
BRCA	Yan_CD8 IFN Gamma	-0.261699	0.0507103	0.189249	-0.270353	0.0466661	0.123877
BRCA	Yan_TCS	-0.261699	0.0507103	0.189249	-0.270353	0.0466661	0.123877
BRCA	Oh.CD8.PRO	0.229076	0.130173	0.240574	0.302028	0.0476085	0.124122
BRCA	Exhaust_1_Feldman	0.24655	0.101776	0.228605	0.313112	0.0390495	0.123877
BRCA	Oliveira_Prolif_T	0.239653	0.121791	0.238753	0.314491	0.0446868	0.123877
BRCA	Yang_Cuproptosis	0.374856	0.108437	0.232822	0.638989	0.00689838	0.0630321
CESC	Tang_Ferroptosis	-1.57918	0.00355369	0.141378	-1.22583	0.0246838	0.0425049
CESC	Zhang CD8 TCS	-1.18281	0.00387338	0.141378	-0.954936	0.0194679	0.0374538
CESC	Caushi.Stem-like memory	-1.15637	0.00846714	0.199256	-1.42742	0.00144383	0.0212104
CESC	Krishna.ACT.CD8.Stem.Like	-0.993199	0.0121527	0.199256	-1.50782	0.000245199	0.0178995
CESC	Caushi.CD8-Proliferating	-0.952789	0.0180859	0.199256	-1.02284	0.0114636	0.0310162
CESC	Caushi.CD8.Proliferating	-0.946374	0.0262741	0.20545	-0.901587	0.0302032	0.0495468
CESC	Caushi.CD8.Stem-like memory	-0.907702	0.0689042	0.223556	-1.42736	0.00516812	0.0263002
CESC	Oliveira_Tumor Spec_Prolif T	-0.887662	0.0353081	0.20545	-1.15468	0.0064206	0.0263002
CESC	Caushi.CD4CD8(II)	-0.826006	0.0184297	0.199256	-1.23293	0.000698914	0.0206369
CESC	Caushi.CD8.CD4CD8(II)	-0.826006	0.0184297	0.199256	-1.23293	0.000698914	0.0206369
CESC	Mem_Eff_6_Feldman	-0.792693	0.0128297	0.199256	-0.820661	0.0100139	0.0292405
CESC	B16_PROG.EX_Miller	-0.761226	0.0634054	0.210391	-0.943648	0.0231807	0.0417523
CESC	Yang_PD1Hi_Checkpoint	-0.756403	0.0370344	0.20545	-0.921071	0.0115238	0.0310162
CESC	Oh.CD4.CXCL13	-0.74957	0.0826082	0.245807	-1.11	0.0119814	0.0311185
CESC	Oh.CD4IL2RAHI	-0.746738	0.0367087	0.20545	-1.26952	0.000706744	0.0206369
CESC	Lowery_NeoTCR8	-0.740354	0.0562768	0.20545	-1.20933	0.00305491	0.0224359
CESC	Caushi.CD4-Treg	-0.719909	0.04819	0.20545	-1.11657	0.00303801	0.0224359
CESC	Caushi.CD8-Effector(1)	-0.719528	0.0508946	0.20545	-1.07664	0.00445505	0.0255902
CESC	Hanada_Reactive T Cell NSCLC	-0.706574	0.0100538	0.199256	-0.878321	0.00165163	0.0212104
CESC	Oh.CD4.GZMK	-0.701701	0.0208006	0.199256	-1.03165	0.00112562	0.0212104
CESC	Oh.CD8.Naive	-0.701349	0.0549603	0.20545	-1.12837	0.00310567	0.0224359
CESC	Caushi.CD4CD8(I)	-0.686218	0.0442583	0.20545	-1.10025	0.00181678	0.0212104
CESC	Caushi.CD8.CD4CD8(I)	-0.686218	0.0442583	0.20545	-1.10025	0.00181678	0.0212104
CESC	Oliveira_Tumor Spec_Pro_Exhaust	-0.679381	0.0982179	0.26744	-1.15362	0.00678851	0.0263002
CESC	Caushi.CD4-Th(1)	-0.668256	0.0630004	0.210391	-1.17934	0.00139366	0.0212104
CESC	CD8_B_Feldman	-0.64378	0.0551708	0.20545	-0.953308	0.00602297	0.0263002
CESC	Caushi.CD4-Tfh(1)	-0.637138	0.154407	0.304641	-1.08783	0.0174713	0.0374538
CESC	Caushi.CD8-Effector(2)	-0.623477	0.0269449	0.20545	-0.862079	0.00308587	0.0224359
CESC	Caushi.CD8-TRM(1)	-0.605132	0.0548534	0.20545	-0.85508	0.00848988	0.0263002
CESC	Caushi.CD4-Th(2)	-0.590023	0.07876	0.243037	-1.03046	0.00341415	0.0224359
CESC	Caushi.CD8-Effector(3)	-0.58393	0.055363	0.20545	-0.920764	0.0033479	0.0224359
CESC	Grog.Treg.1	-0.582408	0.0286119	0.20545	-0.858306	0.0018886	0.0212104
CESC	Yost_CD8_Memory	-0.577809	0.0797007	0.243037	-0.919864	0.00688981	0.0263002
CESC	Caushi.CD8-TRM(2)	-0.574636	0.0622064	0.210391	-0.834707	0.00852658	0.0263002
CESC	Caushi.CD8.Effector(II)	-0.568415	0.0326536	0.20545	-0.688193	0.0110737	0.0310162
CESC	Oliveira_Tumor Spec_TET	-0.558302	0.117089	0.278825	-1.12559	0.00270626	0.0224359
CESC	Caushi.CD8.TRM(V)	-0.557394	0.108381	0.277722	-1.01924	0.00473243	0.0255902
CESC	Mel_Exhaust_Tirosh	-0.553966	0.0562876	0.20545	-0.87371	0.00368197	0.0224359
CESC	Oliveira_TET	-0.54923	0.102816	0.272931	-0.957699	0.00616972	0.0263002
CESC	Caushi.CD8.TRM(IV)	-0.548794	0.0384475	0.20545	-0.734794	0.0071188	0.0263002
CESC	Grog.8EM	-0.53756	0.0209172	0.199256	-0.721722	0.00252888	0.0224359
CESC	Yost_CD8 Exh	-0.535643	0.139601	0.287066	-0.906241	0.0152653	0.0351053
CESC	Oh.CD4.TH17	-0.534865	0.169864	0.319514	-0.886234	0.0272663	0.0457572
CESC	Oh.CD8.CD39	-0.52883	0.0944279	0.265124	-0.818174	0.01249	0.0311185
CESC	Oh.CD4IL2RALO	-0.518186	0.135222	0.287066	-0.975409	0.00672464	0.0263002
CESC	Yost_CD8 Eff mem	-0.499554	0.139372	0.287066	-0.996322	0.0045655	0.0255902
CESC	Grog.CD4.IL6ST	-0.491423	0.11364	0.278825	-0.867658	0.00805565	0.0263002
CESC	Caushi.CD8.TRM(II)	-0.486747	0.136354	0.287066	-0.757737	0.0234499	0.0417523
CESC	Guo_Exhau CD8	-0.485924	0.127386	0.287066	-0.841612	0.0116842	0.0310162
CESC	Oh.CD4.GZMB	-0.48214	0.108426	0.277722	-0.876667	0.0053384	0.0263002
CESC	Yost_CD8 Act/Exh	-0.477114	0.130267	0.287066	-0.878667	0.00813583	0.0263002
CESC	Oliveira_Tumor Spec_EM	-0.47656	0.251282	0.416899	-1.12869	0.00864665	0.0263002
CESC	Exhaust_3_Feldman	-0.474331	0.0470209	0.20545	-0.669972	0.00626657	0.0263002
CESC	Chatani_TP	-0.47274	0.0137672	0.199256	-0.570101	0.00368809	0.0224359
CESC	Li.CD8.DYS	-0.46743	0.111678	0.278825	-0.746904	0.0140354	0.0330512
CESC	Caushi.CD8.TRM(VI)	-0.459867	0.137463	0.287066	-0.746568	0.0186762	0.0374538
CESC	Lowery_NeoTCR4	-0.45445	0.145135	0.294303	-0.726568	0.0229443	0.0417523
CESC	Zou_Immune Rxn HCC	-0.453619	0.118405	0.278825	-0.741045	0.0124653	0.0311185
CESC	Chen_Recurrent Papillary Thyroid	-0.449935	0.030483	0.20545	-0.576523	0.00621149	0.0263002
CESC	Guo_Exhau CD4	-0.445781	0.156727	0.305095	-0.778724	0.0170786	0.0372161
CESC	Caushi.CD8.Effector(I)	-0.445461	0.211341	0.376289	-0.848018	0.018712	0.0374538
CESC	Caushi.CD4-Tfh(2)	-0.444341	0.229021	0.402856	-0.942609	0.0128395	0.0312427
CESC	Oh.CD4.CM	-0.441961	0.326783	0.488682	-1.04737	0.0229302	0.0417523
CESC	Qi_TREG	-0.431693	0.0218363	0.199256	-0.61414	0.00134207	0.0212104
CESC	Oliveira_EMT	-0.422718	0.236031	0.405419	-0.987011	0.00762466	0.0263002
CESC	Zheng_Exhau T Cell	-0.418616	0.197247	0.355532	-0.836684	0.0136691	0.0327163
CESC	Ghatalia_T Cell Inflation RCC	-0.406091	0.0363809	0.20545	-0.58804	0.00320303	0.0224359
CESC	Caushi.CD8-MHCII	-0.386157	0.191758	0.349959	-0.734281	0.0153886	0.0351053
CESC	Caushi.CD8.Effector(III)	-0.371599	0.232778	0.404591	-0.738719	0.0199109	0.0377532
CESC	Duhen_Tumor React CD8	-0.36788	0.059821	0.210391	-0.514119	0.0107475	0.0307674
CESC	Oh.CD8.FGFBP2	-0.366967	0.306881	0.472066	-0.882397	0.017724	0.0374538
CESC	Guo_Supp Treg	-0.359546	0.3954	0.555081	-1.11167	0.0125753	0.0311185
CESC	Yan_TCS	-0.337198	0.0858642	0.245807	-0.466255	0.0194965	0.0374538
CESC	Yan_CD8 IFN Gamma	-0.337198	0.0858642	0.245807	-0.466255	0.0194965	0.0374538
CESC	Grog.8Trm.3	-0.333243	0.139095	0.287066	-0.615924	0.00859908	0.0263002
CESC	Oliveira_Tumor Spec_AAT	-0.324544	0.441574	0.608206	-1.15306	0.00925069	0.0275633
CESC	Zheng_TREG	-0.32342	0.478274	0.637819	-1.08279	0.0207402	0.0388213
CESC	Wu_OS Pancreatic CA	-0.311876	0.393426	0.555081	-0.856732	0.0168247	0.0372161
CESC	Grog.8Trm.2	-0.306765	0.150253	0.300505	-0.494334	0.024746	0.0425049
CESC	Oh.TIL_CD4.GZMB	-0.289955	0.338261	0.493861	-0.851238	0.00821669	0.0263002
CESC	Oliveira_TM	-0.273042	0.576645	0.738511	-1.16757	0.0182239	0.0374538
CESC	Grog.Treg.2	-0.261294	0.328019	0.488682	-0.671307	0.0165543	0.0371835
CESC	Grog.8Trm.1	-0.223652	0.413998	0.575655	-0.790806	0.00690869	0.0263002
CESC	Grog.8chrom	-0.138493	0.644287	0.777405	-0.844915	0.00768351	0.0263002
CESC	Oh.CD8.XCL	-0.136524	0.619464	0.758022	-0.657823	0.0254616	0.0432255
CESC	Oh.CD4.Activate	-0.135974	0.714685	0.833548	-0.946251	0.0191302	0.0374538
CESC	Caushi.CD8.MAIT	-0.103306	0.819218	0.912337	-1.02456	0.0242751	0.0425049
CESC	Yost_CD8 Activated	-0.0189175	0.956625	0.983572	-0.794915	0.0293321	0.0486646
CESC	Liu_Hypoxia	2.03007	1.89974e-06	0.000277362	1.53408	0.000229102	0.0178995
CHOL	LCMV_PROG.EX_Miller	-1.82733	0.127838	0.569189	-4.2128	0.00269784	0.0590735
CHOL	B16_PROG.EX_Miller	-1.45748	0.191366	0.569189	-3.59225	0.00479286	0.0590735
CHOL	Caushi.CD8.Stem-like memory	-1.35534	0.104649	0.569189	-2.83333	0.00387167	0.0590735
CHOL	Mem_Eff_6_Feldman	-1.00124	0.1482	0.569189	-2.7628	0.00167273	0.0590735
CHOL	Caushi.CD4-Tfh(1)	-1.11438	0.226197	0.569189	-2.68668	0.0101724	0.0590735
CHOL	Caushi.CD8.MAIT	-1.71233	0.0954862	0.569189	-2.68239	0.0118236	0.0590735
CHOL	Caushi.Stem-like memory	-1.24984	0.135296	0.569189	-2.65894	0.005041	0.0590735
CHOL	Caushi.MAIT	-1.60742	0.111152	0.569189	-2.56989	0.0200236	0.0713037
CHOL	Zhang CD8 TCS	-1.44108	0.183702	0.569189	-2.52329	0.0149634	0.0606848
CHOL	Oh.CD4.TH17	-1.42999	0.12812	0.569189	-2.46249	0.00888133	0.0590735
CHOL	Yang_Cuproptosis	-0.724479	0.44594	0.658436	-2.36015	0.0161435	0.0637013
CHOL	Caushi.CD4-Tfh(2)	-0.661999	0.501869	0.675131	-2.34873	0.0363249	0.0924643
CHOL	Caushi.CD8-Effector(1)	-0.93184	0.209068	0.569189	-2.3309	0.00329706	0.0590735
CHOL	Caushi.CD4-Treg	-1.05084	0.202727	0.569189	-2.23153	0.0141836	0.0591659
CHOL	Oliveira_EMT	-1.05587	0.172755	0.569189	-2.22622	0.00662286	0.0590735
CHOL	Jansen_Stem like	-0.983098	0.187419	0.569189	-2.21726	0.0100589	0.0590735
CHOL	Caushi.CD4-Th(2)	-0.899626	0.229966	0.569189	-2.20725	0.00800914	0.0590735
CHOL	Caushi.CD8.Effector(III)	-0.992841	0.197873	0.569189	-2.1759	0.00605963	0.0590735
CHOL	Lowery_NeoTCR4	-0.829928	0.377099	0.625501	-2.14632	0.024811	0.0770724
CHOL	Caushi.CD8-Effector(3)	-1.09705	0.15315	0.569189	-2.09771	0.00414766	0.0590735
CHOL	Wang_OS Benefit	-1.74504	0.066153	0.569189	-2.08135	0.0115031	0.0590735
CHOL	Caushi.CD4-Th(1)	-0.894619	0.205646	0.569189	-2.06703	0.00898728	0.0590735
CHOL	Caushi.CD4CD8(I)	-0.95354	0.154701	0.569189	-2.06302	0.00648641	0.0590735
CHOL	Caushi.CD8.CD4CD8(I)	-0.95354	0.154701	0.569189	-2.06302	0.00648641	0.0590735
CHOL	Caushi.CD8.TRM(IV)	-0.789073	0.209395	0.569189	-2.04091	0.00347451	0.0590735
CHOL	Caushi.CD4CD8(II)	-1.00265	0.171495	0.569189	-2.04002	0.0112289	0.0590735
CHOL	Caushi.CD8.CD4CD8(II)	-1.00265	0.171495	0.569189	-2.04002	0.0112289	0.0590735
CHOL	Caushi.CD8.TRM(V)	-0.870153	0.254873	0.569189	-2.00866	0.0107741	0.0590735
CHOL	Caushi.CD8.Effector(I)	-0.905732	0.207472	0.569189	-1.98435	0.0100456	0.0590735
CHOL	Caushi.CD4-Th(3)	-1.45934	0.100408	0.569189	-1.98345	0.018688	0.0699603
CHOL	Krishna.ACT.CD8.Stem.Like	-0.431807	0.593757	0.745323	-1.95007	0.0234932	0.0769554
CHOL	Yost_CD8 Exh	-1.03473	0.258497	0.569189	-1.88576	0.0300624	0.0860609
CHOL	Oh.CD4.GZMK	-0.863979	0.186979	0.569189	-1.88485	0.00527854	0.0590735
CHOL	Caushi.CD8-TRM(1)	-1.04681	0.173289	0.569189	-1.86018	0.00786917	0.0590735
CHOL	Yost_CD8 Eff mem	-1.12071	0.141831	0.569189	-1.81761	0.012687	0.0590735
CHOL	CD8_G_Feldman	-1.14662	0.129863	0.569189	-1.81629	0.022508	0.0764225
CHOL	Caushi.CD8.TRM(II)	-0.841657	0.235697	0.569189	-1.81477	0.0120714	0.0590735
CHOL	B16_TERMINAL.EX_Miller	-0.838643	0.376173	0.625501	-1.81238	0.0307556	0.0863522
CHOL	Caushi.CD8-TRM(2)	-0.906513	0.26427	0.569189	-1.80045	0.0171445	0.0658711
CHOL	Caushi.CD8-Effector(2)	-0.703942	0.258438	0.569189	-1.78871	0.00625093	0.0590735
CHOL	Yost_CD8 Act/Exh	-0.820291	0.316156	0.613815	-1.77593	0.0220046	0.0764225
CHOL	Oliveira_TET	-1.1534	0.239493	0.569189	-1.71151	0.0495859	0.110699
CHOL	Feldman_CD8_G	-1.26094	0.101616	0.569189	-1.7055	0.0315612	0.086942
CHOL	Caushi.CD8-MHCII	-0.775047	0.252447	0.569189	-1.60992	0.0138864	0.0591659
CHOL	Hanada_Reactive T Cell NSCLC	-0.638966	0.323724	0.613815	-1.59306	0.0127396	0.0590735
CHOL	Yost_CD8_Memory	-0.475938	0.486223	0.673327	-1.5929	0.0260724	0.0793035
CHOL	Oh.CD8.CD39	-0.877329	0.296268	0.599021	-1.53858	0.0367324	0.0924643
CHOL	Mel_Exhaust_Tirosh	-0.871032	0.299511	0.599021	-1.52186	0.0438573	0.101637
CHOL	Exhaust_3_Feldman	-0.942395	0.12729	0.569189	-1.48473	0.0127226	0.0590735
CHOL	Caushi.CD8.Effector(II)	-0.581254	0.350269	0.625501	-1.46984	0.0136379	0.0591659
CHOL	Bao_MSI vs. MSS	-0.80844	0.227391	0.569189	-1.45438	0.0237496	0.0769554
CHOL	Guo_Exhau CD4	-0.613432	0.357683	0.625501	-1.45229	0.0330959	0.0885947
CHOL	Grog.8chrom	-0.790564	0.19166	0.569189	-1.4416	0.0129476	0.0590735
CHOL	Oh.CD8.XCL	-1.08535	0.115702	0.569189	-1.43722	0.0281908	0.0823171
CHOL	Caushi.CD8.TRM(VI)	-1.33919	0.119422	0.569189	-1.43026	0.0482632	0.1101
CHOL	Grog.8Trm.1	-0.716896	0.265102	0.569189	-1.35098	0.0273405	0.0814636
CHOL	Oh.CD4.GZMB	-0.949483	0.205784	0.569189	-1.3295	0.0414611	0.0992348
CHOL	Zou_Immune Rxn HCC	-0.759312	0.192615	0.569189	-1.28905	0.0242462	0.0769554
CHOL	Duhen_Tumor React CD8	-0.301915	0.513263	0.679727	-1.05317	0.0231937	0.075834
CHOL	Grog.Treg.1	-0.85689	0.169806	0.569189	-1.08875	0.043126	0.101555
CHOL	Chatani_TP	-0.33583	0.447505	0.658436	-1.00937	0.0193025	0.0704542
CHOL	Grog.8EM	-0.336999	0.498875	0.675131	-1.00256	0.0349922	0.0912297
CHOL	Qi_TREG	-0.518683	0.261697	0.569189	-0.992607	0.0333747	0.0885947
CHOL	Ghatalia_T Cell Inflation RCC	-0.422236	0.333094	0.623483	-0.846908	0.0404209	0.0983576
CHOL	Oh.CD4.PROLIF	1.62101	0.0504433	0.569189	1.32475	0.0398917	0.0983576
COAD	TOX_Scott	-0.669566	0.0518278	0.924394	-0.631244	0.0387974	0.472035
COAD	Caushi.CD8.Proliferating	-0.531731	0.0753398	0.924394	-0.598352	0.0228009	0.405012
COAD	Yuan_Hypoxia	-0.487308	0.0542971	0.924394	-0.502121	0.0250323	0.405012
COAD	Oliveira_Prolif_T	-0.386808	0.0540735	0.924394	-0.431527	0.0155557	0.392179
COAD	Oh.CD8.PRO	-0.376881	0.0544683	0.924394	-0.428556	0.0138363	0.392179
COAD	Wang_Cytokine Exp	-0.363975	0.0525556	0.924394	-0.370628	0.0277406	0.405012
COAD	Oh.CD4.PROLIF	-0.350854	0.08986	0.924394	-0.384365	0.0365658	0.472035
COAD	Exhaust_1_Feldman	-0.32356	0.0882834	0.924394	-0.379629	0.0242315	0.405012
COAD	Ghatalia_T Cell Inflation RCC	-0.295402	0.0804119	0.924394	-0.366364	0.0161169	0.392179
COAD	Liu_Hypoxia	0.656032	0.0550168	0.924394	0.882544	0.00471037	0.392179
COAD	Krishna.ACT.CD8.Term.Diff	-0.589499	0.0200066	0.924394	-0.555523	0.0126626	0.392179
COAD	Tang_Ferroptosis	0.946626	0.0430459	0.924394	1.01558	0.0139274	0.392179
DLBC	Liu_Hypoxia	-2.47492	0.0621919	0.952812	-2.87791	0.0155539	0.941369
DLBC	Oliveira_TM	-1.13396	0.506353	0.952812	-3.18516	0.0291617	0.941369
DLBC	Hou_T Cell Prolif	0.589428	0.529391	0.952812	2.23072	0.00802546	0.941369
ESCA	An_CervicalCA	0.325475	0.262977	0.637873	0.549672	0.0418112	0.996561
GBM	Li_Pyroptosis	0.0832963	0.649199	0.770594	0.445846	0.0192606	0.0484836
GBM	Bao_MSI vs. MSS	0.169287	0.371868	0.57833	0.466042	0.0109421	0.0427268
GBM	Ghatalia_T Cell Inflation RCC	0.217466	0.21215	0.523317	0.459871	0.00841802	0.0427268
GBM	Lowery_NeoTCR4	0.250228	0.360742	0.57833	0.648327	0.0139199	0.0427268
GBM	Grog.8EFF	0.261964	0.186567	0.523317	0.486397	0.013031	0.0427268
GBM	Grog.8Trm.3	0.270607	0.157779	0.511906	0.46786	0.0136691	0.0427268
GBM	Zheng_TREG	0.272424	0.365882	0.57833	0.737202	0.0125717	0.0427268
GBM	Zheng_Exhau T Cell	0.273529	0.378674	0.57833	0.742391	0.0149251	0.0427268
GBM	Wang_Cytokine Exp	0.290698	0.10049	0.511906	0.552776	0.00162614	0.027842
GBM	Oliveira_TET	0.298667	0.287746	0.536982	0.672503	0.0133904	0.0427268
GBM	Yost_Naive	0.305148	0.182541	0.523317	0.574037	0.0107828	0.0427268
GBM	Ahuluwalia_Prognostic Cell Death	0.313777	0.290564	0.536982	0.788369	0.00643811	0.040868
GBM	Caushi.CD8-MHCII	0.319895	0.137757	0.511906	0.578791	0.00607554	0.0406012
GBM	Caushi.CD4-Tfh(2)	0.324184	0.279912	0.536982	0.709846	0.0163687	0.0440685
GBM	Caushi.CD4-Treg	0.326047	0.279559	0.536982	0.6854	0.0197352	0.0488363
GBM	Caushi.CD4CD8(I)	0.336175	0.205599	0.523317	0.678125	0.00925725	0.0427268
GBM	Caushi.CD8.CD4CD8(I)	0.336175	0.205599	0.523317	0.678125	0.00925725	0.0427268
GBM	Oliveira_Tumor Spec_TET	0.338747	0.257056	0.536982	0.690058	0.0174872	0.0447917
GBM	Caushi.CD4CD8(II)	0.342814	0.209654	0.523317	0.652828	0.0135837	0.0427268
GBM	Caushi.CD8.CD4CD8(II)	0.342814	0.209654	0.523317	0.652828	0.0135837	0.0427268
GBM	Oh.CD4.TH17	0.343728	0.215062	0.523317	0.693345	0.0106981	0.0427268
GBM	Yost_CD8 Activated	0.350708	0.192784	0.523317	0.637933	0.017467	0.0447917
GBM	Exhaust_2_Feldman	0.350936	0.31878	0.547551	0.895127	0.0135137	0.0427268
GBM	Grog.Treg.2	0.351658	0.0817995	0.511906	0.547521	0.00590252	0.0406012
GBM	Grog.Treg.1	0.357162	0.0675341	0.511906	0.52155	0.00696079	0.0423448
GBM	Yost_CD8 Act/Exh	0.372308	0.201619	0.523317	0.793439	0.00549838	0.0406012
GBM	Caushi.CD8.TRM(III)	0.374838	0.124699	0.511906	0.582537	0.0161671	0.0440685
GBM	Oh.CD4.GZMK	0.379601	0.111833	0.511906	0.558532	0.0149184	0.0427268
GBM	Oh.CD8.FGFBP2	0.392808	0.154714	0.511906	0.672415	0.0130161	0.0427268
GBM	Caushi.CD4-Th(2)	0.398996	0.101213	0.511906	0.697055	0.00338268	0.037936
GBM	Oh.CD8.CD39	0.400585	0.142556	0.511906	0.755592	0.00503571	0.0406012
GBM	Caushi.CD8.TRM(I)	0.404317	0.144962	0.511906	0.742898	0.00611799	0.0406012
GBM	Yost_CD8 Eff mem	0.407331	0.15056	0.511906	0.738879	0.0073893	0.0427268
GBM	Oh.CD4.CXCL13	0.41417	0.212633	0.523317	0.801066	0.014259	0.0427268
GBM	Caushi.CD8.TRM(V)	0.426529	0.128321	0.511906	0.697097	0.010496	0.0427268
GBM	Liu_Hypoxia	0.428324	0.0873474	0.511906	0.641637	0.0108453	0.0427268
GBM	Oh.CD4.GZMB	0.431536	0.0854366	0.511906	0.772154	0.00193944	0.027842
GBM	Caushi.CD8.TRM(II)	0.441109	0.148138	0.511906	0.761706	0.0103784	0.0427268
GBM	Krishna.ACT.CD8.Stem.Like	0.452835	0.117417	0.511906	0.689344	0.0121627	0.0427268
GBM	Oliveira_EMT	0.45493	0.0857817	0.511906	0.665198	0.0104433	0.0427268
GBM	Caushi.CD8.Effector(I)	0.46691	0.123673	0.511906	0.771503	0.00901087	0.0427268
GBM	Hanada_Reactive T Cell NSCLC	0.470032	0.0701175	0.511906	0.792469	0.00173004	0.027842
GBM	Yost_CD8 Exh	0.475174	0.125264	0.511906	0.874998	0.0044172	0.037936
GBM	Oh.CD4IL2RAHI	0.483205	0.0888062	0.511906	0.907604	0.000948322	0.0230758
GBM	Li_Immune Inf	0.483826	0.0571574	0.511906	0.724917	0.0039952	0.037936
GBM	Li.CD8.DYS	0.497489	0.106531	0.511906	0.767636	0.0115085	0.0427268
GBM	Caushi.MAIT	0.521046	0.112475	0.511906	0.978557	0.00209769	0.027842
GBM	Caushi.CD4-Th(1)	0.531811	0.0613566	0.511906	0.792499	0.0043832	0.037936
GBM	Oliveira_TM	0.545304	0.113903	0.511906	0.784107	0.0201737	0.0490894
GBM	Caushi.CD8.MAIT	0.569009	0.0612379	0.511906	1.01732	0.000635377	0.0218751
GBM	Caushi.Stem-like memory	0.576152	0.171325	0.523317	0.97732	0.0165993	0.0440685
GBM	Jansen_Stem like	0.576402	0.0516812	0.511906	0.918769	0.00181889	0.027842
GBM	B16_TERMINAL.EX_Miller	0.581745	0.05605	0.511906	0.875049	0.00437526	0.037936
GBM	Wang_OS Benefit	0.584646	0.08106	0.511906	0.832786	0.0143618	0.0427268
GBM	Caushi.CD4-Th(3)	0.502069	0.0462951	0.511906	0.735503	0.0031597	0.037936
GBM	An_CervicalCA	0.594978	0.0394219	0.511906	0.684657	0.0166011	0.0440685
GBM	Wu_OS Pancreatic CA	0.61174	0.0300077	0.511906	0.955337	0.000370279	0.0180202
GBM	B16_PROG.EX_Miller	0.896553	0.0115391	0.421178	1.34166	0.000312127	0.0180202
GBM	LCMV_TERMN.EX_Miller	0.993178	0.00425258	0.310439	1.14469	0.000749149	0.0218751
GBM	LCMV_PROG.EX_Miller	1.25778	0.00197555	0.28843	1.58993	0.000102533	0.0149698
HNSC	Tang_Ferroptosis	-2.03379	3.02851e-10	4.42162e-08	-1.5004	6.03911e-06	0.00088171
HNSC	Zhang CD8 TCS	-0.755649	0.00317675	0.0386505	-0.911624	0.000910076	0.0269443
HNSC	B16_PROG.EX_Miller	-0.705108	0.00272422	0.0386505	-0.816205	0.00128604	0.0269443
HNSC	Caushi.CD4CD8(II)	-0.621666	0.00133176	0.0386505	-0.657654	0.0014764	0.0269443
HNSC	Caushi.CD8.CD4CD8(II)	-0.621666	0.00133176	0.0386505	-0.657654	0.0014764	0.0269443
HNSC	Caushi.CD4CD8(I)	-0.578342	0.00288111	0.0386505	-0.728727	0.00048711	0.023706
HNSC	Caushi.CD8.CD4CD8(I)	-0.578342	0.00288111	0.0386505	-0.728727	0.00048711	0.023706
HNSC	Qi_TREG	-0.366218	0.00103398	0.0386505	-0.391018	0.000987401	0.0269443
KICH	Oh.CD8.HSP	-4.30571	0.00857339	0.217527	-2.44199	0.0424436	0.387376
KICH	Tang_Ferroptosis	-4.19384	0.0212952	0.217527	-5.02205	0.00443247	0.369593
KICH	Oh.CD4.HSP	-3.09135	0.0237427	0.217527	-2.52433	0.0355392	0.387376
KICH	Oh.CD4.MITO	-2.61435	0.00160046	0.116834	-1.87205	0.00927665	0.387376
KICH	Oh.CD8.MITO	-2.40997	0.00138265	0.116834	-1.87663	0.00506292	0.369593
KICH	Shi_TCS	-1.75929	0.0623587	0.325156	-1.82803	0.0407689	0.387376
KICH	Mo_Hypoxia	0.86577	0.159177	0.585057	1.14404	0.0381464	0.387376
KICH	Exhaust_1_Feldman	2.47962	0.0289411	0.248553	1.80357	0.0424522	0.387376
KICH	Oh.CD8.PRO	2.93836	0.0161739	0.217527	2.09609	0.0266127	0.387376
KICH	Krishna.ACT.CD8.Term.Diff	3.02114	0.0363265	0.26076	2.45656	0.0476369	0.409117
KICH	Grog.8Mit	3.13075	0.0238385	0.217527	2.85959	0.0203368	0.387376
KICH	Caushi.CD8-Proliferating	3.29803	0.0224022	0.217527	2.78719	0.0302379	0.387376
KICH	Oliveira_Prolif_T	3.36179	0.0133402	0.217527	2.3856	0.0213225	0.387376
KICH	Oh.CD4.PROLIF	3.36867	0.00813536	0.217527	2.72678	0.0111565	0.387376
KICH	Caushi.CD8.Proliferating	3.81868	0.0182032	0.217527	2.89478	0.0355585	0.387376
KICH	Oliveira_Tumor Spec_Prolif T	3.94699	0.0368455	0.26076	3.85371	0.0318149	0.387376
KICH	An_CervicalCA	3.98478	0.010074	0.217527	3.06102	0.0147717	0.387376
KIRC	Zhang CD8 TCS	-1.96574	4.80286e-10	5.83317e-08	-1.63795	3.90002e-07	1.04291e-05
KIRC	Caushi.Stem-like memory	-1.23835	1.16015e-05	0.000423454	-0.703013	0.0159279	0.0347085
KIRC	Early.Act_5_Feldman	-0.964996	7.93298e-05	0.00128691	-0.596731	0.0178051	0.0376746
KIRC	Jansen_Stem like	-0.959812	0.000164788	0.00218718	-0.619307	0.0194388	0.0405439
KIRC	Oh.CD8.MAIT	-0.253416	0.219605	0.381694	0.509856	0.0198317	0.0407807
KIRC	Oliveira_Tumor Spec_EM	-0.242755	0.316892	0.48194	0.57368	0.0250585	0.0494397
KIRC	Oliveira_Tumor Spec_Pro_Exhaust	-0.114086	0.636233	0.767686	0.634949	0.0130762	0.0293711
KIRC	Grog.8KLRB1	-0.0693664	0.69498	0.805295	0.483994	0.0108756	0.0252037
KIRC	Grog.CD4.TCF7	0.0368464	0.784303	0.848209	0.398954	0.00586152	0.0152818
KIRC	Oliveira_Tumor Spec_TET	0.0683222	0.767711	0.842751	0.733031	0.00304734	0.00889824
KIRC	Yost_CD8 Exh	0.0739549	0.758693	0.840039	0.66405	0.00944284	0.0226009
KIRC	Guo_Supp Treg	0.083565	0.723872	0.819267	0.792413	0.00170276	0.00591913
KIRC	Grog.CD4.IL6ST	0.0874158	0.658066	0.768621	0.716707	0.000758421	0.00307582
KIRC	Caushi.CD4-Th(2)	0.106433	0.607008	0.755868	0.613781	0.00599704	0.0153608
KIRC	Guo_Activated Treg	0.116347	0.561027	0.724867	0.73602	0.000609416	0.00254214
KIRC	Lowery_NeoTCR8	0.118803	0.605318	0.755868	0.761692	0.00202893	0.00673237
KIRC	Zheng_Exhau T Cell	0.13204	0.569503	0.729364	0.558882	0.0223794	0.0447589
KIRC	Grog.8EM	0.147603	0.328881	0.489966	0.4407	0.00691605	0.0174094
KIRC	LCMV_PROG.EX_Miller	0.15211	0.628	0.764067	0.818615	0.0136759	0.0302528
KIRC	CD8_B_Feldman	0.152649	0.441181	0.601986	0.639794	0.0024446	0.00768726
KIRC	Grog.CD4.RPL32	0.167835	0.212101	0.381694	0.542549	0.000221135	0.0011133
KIRC	Oh.CD8.RPL	0.186762	0.196127	0.369532	0.540629	0.000574359	0.00249145
KIRC	Grog.8Mit	0.190717	0.304387	0.477854	0.657316	0.000862514	0.00331215
KIRC	Oh.CD4.GZMK	0.193073	0.320688	0.482685	0.594575	0.00426586	0.0115336
KIRC	Oh.CD8.FGFBP2	0.197256	0.354326	0.502249	0.657831	0.00407558	0.0115336
KIRC	Oh.TIL_CD4IL2RALO	0.202861	0.258551	0.433891	0.694305	0.000311018	0.00141902
KIRC	Zhang_CD8 Infiltration	0.216597	0.339654	0.495895	0.668872	0.00563942	0.0149701
KIRC	Ghatalia_T Cell Inflation RCC	0.225231	0.127062	0.27281	0.402333	0.0105043	0.024736
KIRC	Caushi.CD4-Th(3)	0.229021	0.314934	0.48194	1.01692	4.42824e-05	0.000307868
KIRC	Yan_TCS	0.239238	0.0873604	0.21618	0.395661	0.00747768	0.0181957
KIRC	Yan_CD8 IFN Gamma	0.239238	0.0873604	0.21618	0.395661	0.00747768	0.0181957
KIRC	Caushi.CD8-TRM(2)	0.240189	0.266548	0.437259	0.674897	0.00418959	0.0115336
KIRC	Yost_CD8_Memory	0.249081	0.218877	0.381694	0.681898	0.00177224	0.00601736
KIRC	Oh.TIL_CD4.GZMK	0.260425	0.201168	0.371779	0.835906	0.000129756	0.000701645
KIRC	Oh.CD8.CD39	0.260939	0.231007	0.392174	0.756413	0.00125264	0.00457214
KIRC	Hanada_Reactive T Cell NSCLC	0.264729	0.182224	0.350062	0.653109	0.00252732	0.00768726
KIRC	Oh.TIL_CD4IL2RAHI	0.264893	0.131887	0.275568	0.741858	8.42995e-05	0.000492309
KIRC	Liu_Hypoxia	0.265981	0.270132	0.438214	1.01581	8.06552e-05	0.000490653
KIRC	Caushi.CD8.TRM(VI)	0.269059	0.211201	0.381694	0.714354	0.00238493	0.00768726
KIRC	B16_TERMINAL.EX_Miller	0.300241	0.264486	0.437259	0.983726	0.0005802	0.00249145
KIRC	Caushi.CD8-TRM(1)	0.321876	0.137284	0.282302	0.786597	0.000884753	0.00331215
KIRC	Grog.8EFF	0.33296	0.0514694	0.14451	0.552366	0.00252243	0.00768726
KIRC	Oh.CD4IL2RAHI	0.344564	0.197421	0.369532	0.84424	0.00292527	0.0087161
KIRC	Caushi.CD8-MHCII	0.347558	0.0680711	0.184044	0.48058	0.0165948	0.0356299
KIRC	Yost_CD8 Act/Exh	0.353822	0.109184	0.249076	0.738427	0.00166396	0.00591913
KIRC	Yang_PD1Hi_Checkpoint	0.37904	0.0628954	0.173259	0.792894	0.000268479	0.00126445
KIRC	Oh.CD4IL2RALO	0.409109	0.078972	0.202279	0.927964	0.000203742	0.00106237
KIRC	Oliveira_Tumor Spec_Prolif T	0.410347	0.0783395	0.202279	1.05354	2.42133e-05	0.000196397
KIRC	Mem_Eff_4_Feldman	-0.836087	0.000409095	0.00426628	-0.553927	0.0222485	0.0447589
KIRC	Oh.TIL_CD4.GZMB	0.376355	0.0432573	0.131574	0.836083	3.13225e-05	0.000240689
KIRC	Liu_Treg	0.427083	0.0243594	0.0808289	0.566695	0.00420515	0.0115336
KIRC	Grog.CD4.Trm	0.431179	0.00701189	0.0292496	0.830921	1.88715e-06	2.29604e-05
KIRC	Chen_Recurrent Papillary Thyroid	0.466527	0.00391699	0.0184478	0.673642	0.000117597	0.000660353
KIRC	Grog.8Trm.3	0.470106	0.00263843	0.0154085	0.669974	5.98309e-05	0.000385724
KIRC	Guo_Exhau CD8	0.477372	0.0195561	0.0679807	0.952923	1.36455e-05	0.000124515
KIRC	Grog.Treg.2	0.480563	0.00672001	0.0288565	0.837557	1.12547e-05	0.000109546
KIRC	Oh.CD4.GZMB	0.482867	0.018752	0.0667753	0.925008	3.47493e-05	0.00025367
KIRC	Qi_TREG	0.493113	0.00170446	0.01185	0.799434	2.90745e-06	3.26529e-05
KIRC	TOX_Scott	0.493677	0.0459019	0.134033	0.971299	0.000242133	0.00117838
KIRC	Grog.8Trm.2	0.547439	0.00090173	0.00739287	0.708019	6.07647e-05	0.000385724
KIRC	Oh.CD4.PROLIF	0.558937	0.00368626	0.0179398	0.917589	6.5597e-06	6.84083e-05
KIRC	Caushi.CD8.Proliferating	0.56589	0.0208553	0.0708109	1.3384	5.80275e-07	1.059e-05
KIRC	Caushi.CD8.TRM(III)	0.590598	0.00276534	0.0155285	1.03601	1.31337e-06	2.11007e-05
KIRC	Grog.Treg.1	0.595828	0.000648526	0.0059178	0.89984	1.55621e-06	2.11007e-05
KIRC	Wu_OS Pancreatic CA	0.611451	0.00349349	0.0179398	0.561692	0.0114967	0.0262269
KIRC	Oh.CD8.PRO	0.623702	0.000299312	0.00336151	0.931178	4.28594e-07	1.04291e-05
KIRC	Krishna.ACT.CD8.Term.Diff	0.645358	0.00091145	0.00739287	0.99385	1.58978e-06	2.11007e-05
KIRC	Exhaust_1_Feldman	0.653173	8.89137e-05	0.00129814	0.88298	5.65903e-07	1.059e-05
KIRC	Wang_Cytokine Exp	0.655583	6.40052e-05	0.00117222	0.573703	0.00083085	0.00327849
KIRC	Oliveira_Prolif_T	0.660749	0.000236793	0.00288098	0.981336	2.99552e-07	1.04291e-05
KIRC	Caushi.CD8-Proliferating	0.800401	0.000534915	0.0052065	1.3818	3.86212e-08	1.87957e-06
KIRC	Dai_Activation CD4 CD8	0.837109	7.90198e-07	3.84563e-05	1.36931	1.13342e-13	1.6548e-11
KIRC	Li_Immune Inf	0.88382	1.50732e-05	0.000440138	0.923407	2.12097e-05	0.000182154
KIRC	Li_Pyroptosis	1.03216	7.99065e-10	5.83317e-08	1.07445	9.21288e-10	6.7254e-08
KIRP	Zhang CD8 TCS	-1.07239	0.0877014	0.458705	-1.65042	0.00352588	0.0447915
KIRP	Oh.CD4.MITO	-0.556173	0.0493026	0.399899	-0.740695	0.00368149	0.0447915
KIRP	Exhaust_1_Feldman	1.37651	0.000153425	0.0028	1.55298	2.07017e-06	4.98332e-05
KIRP	Oh.CD4.PROLIF	1.46002	0.000405852	0.00658383	1.61808	1.15086e-05	0.000210033
KIRP	Yang_PD1Hi_Checkpoint	1.48134	0.00242789	0.0354472	1.55036	0.00029075	0.00424495
KIRP	Oh.CD8.PRO	1.49109	4.71183e-05	0.00171982	1.65915	4.12773e-07	1.50662e-05
KIRP	Oliveira_Prolif_T	1.52741	5.92174e-05	0.00172915	1.66064	9.72711e-07	2.84032e-05
KIRP	Krishna.ACT.CD8.Term.Diff	1.90132	4.55519e-05	0.00171982	2.25729	9.01318e-08	4.38642e-06
KIRP	Oliveira_Tumor Spec_Prolif T	2.058	0.000148951	0.0028	2.2571	2.38927e-06	4.98332e-05
KIRP	Jansen_Term diff	2.38135	0.000106903	0.0026013	2.24507	2.25036e-05	0.000365059
KIRP	Caushi.CD8.Proliferating	2.41568	4.71691e-06	0.000358306	2.50228	4.53396e-08	3.30979e-06
KIRP	Caushi.CD8-Proliferating	2.52539	4.9083e-06	0.000358306	2.65158	3.67232e-08	3.30979e-06
LGG	Oh.CD8.CM	-0.688505	0.0385335	0.0432761	-0.723993	0.00838623	0.0127541
LGG	Oh.CD8.MAIT	-0.810169	0.00907441	0.0114212	-0.661662	0.00686021	0.0107698
LGG	Mo_Hypoxia	-0.494788	0.0151741	0.0181591	-0.594242	0.000340647	0.000872534
LGG	Grog.8KLRB1	-0.656466	0.00245784	0.00340203	-0.565367	0.00105707	0.00226045
LGG	Oh.CD8.RPL	-0.751145	4.52638e-06	1.34868e-05	-0.564973	1.37017e-05	7.90584e-05
LGG	Grog.CD4.TCF7	-0.700019	9.43047e-06	2.50336e-05	-0.541707	1.98996e-05	9.68445e-05
LGG	Grog.CD4.RPL32	-0.683088	2.19612e-05	5.34389e-05	-0.502924	8.48248e-05	0.000316727
LGG	Hou_T Cell Prolif	-0.514165	0.0362837	0.0410653	-0.460723	0.023957	0.0323863
LGG	Oh.CD4.MITO	-0.772906	3.16424e-05	6.69535e-05	-0.368007	0.00868107	0.0130664
LGG	Oh.CD8.MITO	-0.725818	2.06348e-05	5.10625e-05	-0.336253	0.0088315	0.0131571
LGG	Yan_TCS	0.688095	2.80093e-05	6.23979e-05	0.32775	0.0134685	0.0189077
LGG	Yan_CD8 IFN Gamma	0.688095	2.80093e-05	6.23979e-05	0.32775	0.0134685	0.0189077
LGG	Chen_Recurrent Papillary Thyroid	0.572368	0.00447827	0.00578609	0.340762	0.0308237	0.0401809
LGG	Ghatalia_T Cell Inflation RCC	0.665288	0.000125687	0.000229379	0.382565	0.00705338	0.0109553
LGG	Duhen_Tumor React CD8	0.347492	0.0406587	0.0456246	0.258824	0.0547972	0.0665718
LGG	Caushi.CD8.TRM(IV)	0.832378	0.00092881	0.00144262	0.413941	0.038824	0.0492896
LGG	Grog.8EM	0.817141	4.00114e-05	8.34523e-05	0.423649	0.0074151	0.0113958
LGG	Qi_TREG	0.630701	0.00121748	0.00181379	0.424631	0.00562005	0.00893807
LGG	Grog.8Mit	0.633381	0.0110854	0.0136006	0.446068	0.0215478	0.0294017
LGG	Wang_Cytokine Exp	0.832075	2.24077e-05	5.36315e-05	0.449445	0.00296235	0.00533955
LGG	Oh.CD8.XCL	0.86323	0.000106708	0.000199735	0.478814	0.00528418	0.00857211
LGG	Grog.8EFF	0.863436	4.08893e-06	1.24372e-05	0.487324	0.00117985	0.00235971
LGG	CD8_G_Feldman	0.949958	0.00246997	0.00340203	0.520856	0.0340962	0.0440535
LGG	Grog.8Trm.3	0.864273	3.77312e-06	1.19756e-05	0.524937	0.000357703	0.000900424
LGG	Yost_Naive	1.12291	0.000269316	0.000460164	0.529169	0.0287196	0.0381188
LGG	Guo_Activated Treg	0.831463	0.00570927	0.00731188	0.544866	0.0169147	0.0235195
LGG	Oh.TIL_CD4IL2RAHI	0.87542	0.000390394	0.000655144	0.545513	0.00344206	0.00612855
LGG	Grog.8Trm.1	0.844058	2.83903e-05	6.23979e-05	0.557854	0.000421259	0.00102506
LGG	Grog.Treg.2	0.930153	4.54727e-05	9.35073e-05	0.564506	0.00158984	0.00297586
LGG	Hanada_Reactive T Cell NSCLC	1.01821	0.000746552	0.00120766	0.564682	0.0210628	0.029011
LGG	Early.Act_5_Feldman	1.11096	0.00113262	0.00172253	0.569328	0.0371732	0.0476078
LGG	Caushi.CD8-MHCII	0.915797	9.99478e-05	0.000189511	0.578668	0.00143297	0.00275281
LGG	Mem_Eff_6_Feldman	0.794203	0.00170587	0.00244173	0.595859	0.00276906	0.00511034
LGG	Krishna.ACT.CD8.Stem.Like	0.953885	0.00147393	0.00213063	0.60092	0.0104238	0.0153725
LGG	Exhaust_1_Feldman	0.93945	3.13136e-08	3.80982e-07	0.612385	3.01757e-06	3.67138e-05
LGG	Caushi.CD4CD8(I)	1.09199	0.000694331	0.00113901	0.62283	0.0122712	0.0177385
LGG	Caushi.CD8.CD4CD8(I)	1.09199	0.000694331	0.00113901	0.62283	0.0122712	0.0177385
LGG	Oh.TIL_CD4.GZMB	0.977972	0.000158411	0.000282048	0.624751	0.00146209	0.00277227
LGG	Oh.CD4.Activate	0.901229	0.000199079	0.000350186	0.625174	0.00110521	0.00227269
LGG	Oh.CD4IL2RAHI	1.07794	0.0024551	0.00340203	0.625638	0.0243658	0.0326367
LGG	Oh.CD8.PRO	0.978029	1.32527e-08	1.93489e-07	0.630405	1.86379e-06	2.96992e-05
LGG	Mel_Exhaust_Tirosh	0.968799	0.000966434	0.00148526	0.634849	0.00494789	0.00815734
LGG	Oh.CD4.PROLIF	0.979831	1.97608e-07	1.3114e-06	0.642946	1.37898e-05	7.90584e-05
LGG	Grog.8chrom	1.10661	1.47048e-06	5.668e-06	0.646495	0.000256295	0.000719597
LGG	Yost_CD8_Memory	0.926168	0.00118149	0.00177833	0.660839	0.00280019	0.00511034
LGG	Dai_Activation CD4 CD8	1.06645	1.58699e-06	5.7645e-06	0.668576	0.000120633	0.000391386
LGG	Grog.Treg.1	1.04658	2.70126e-06	9.3901e-06	0.669565	0.000111813	0.000371475
LGG	Grog.CD4.Trm	0.917724	2.88792e-06	9.58264e-06	0.672527	7.82523e-06	5.71242e-05
LGG	B16_PROG.EX_Miller	1.18511	0.00422609	0.00555864	0.685718	0.0304454	0.0400452
LGG	Oh.TIL_CD4IL2RALO	1.0988	7.14092e-06	1.96712e-05	0.688272	0.000184359	0.000549314
LGG	Guo_Exhau CD4	0.952599	0.00282774	0.00382268	0.691216	0.004806	0.00806524
LGG	Oliveira_Prolif_T	1.05452	5.37173e-09	1.12039e-07	0.693461	5.28511e-07	1.19815e-05
LGG	Yuan_Hypoxia	0.858031	5.17402e-05	0.000104918	0.694043	3.2493e-05	0.000138131
LGG	Exhaust_3_Feldman	1.10644	4.82204e-07	2.24276e-06	0.707477	2.34696e-05	0.00010708
LGG	Oh.CD8.Naive	1.24082	0.000141614	0.000255255	0.707774	0.00497263	0.00815734
LGG	Lowery_NeoTCR4	1.03526	0.000228986	0.000397999	0.725157	0.00109847	0.00227269
LGG	Bao_MSI vs. MSS	0.783064	0.000119203	0.000220298	0.72724	5.71809e-06	4.91083e-05
LGG	LCMV_TERMN.EX_Miller	1.08361	0.00429684	0.00560124	0.7483	0.0133526	0.0189077
LGG	Oliveira_TM	1.1895	0.000752722	0.00120766	0.77862	0.00391792	0.00689176
LGG	Lowery_NeoTCR8	1.25887	7.51766e-05	0.000146344	0.779044	0.00128611	0.00252254
LGG	Yost_CD8 Activated	1.24017	7.44014e-06	2.01159e-05	0.782534	0.000271428	0.000747707
LGG	Caushi.CD8-Effector(3)	1.33528	1.47523e-06	5.668e-06	0.795149	0.000239279	0.000684996
LGG	B16_TERMINAL.EX_Miller	1.08786	0.00138607	0.00202367	0.800731	0.00442383	0.00751022
LGG	Jansen_Stem like	1.35093	1.03527e-05	2.69908e-05	0.803939	0.000533116	0.00127598
LGG	Oh.CD4.GZMK	1.248	4.91564e-07	2.24276e-06	0.804203	3.11994e-05	0.000138034
LGG	Guo_Exhau CD8	1.3468	2.86346e-05	6.23979e-05	0.807771	0.000993416	0.00216708
LGG	Caushi.CD8-TRM(2)	1.41851	1.16528e-05	2.98476e-05	0.808351	0.00106829	0.00226045
LGG	Yost_CD8 Eff mem	1.28654	2.87682e-06	9.58264e-06	0.809502	0.000129559	0.000402461
LGG	Oh.CD4.CXCL13	1.32627	0.000854437	0.00134137	0.827636	0.00563221	0.00893807
LGG	Caushi.CD8-TRM(1)	1.56901	2.43495e-07	1.46479e-06	0.83124	0.000301632	0.000800697
LGG	Guo_Supp Treg	1.29429	8.06849e-05	0.000155	0.833829	0.000841848	0.00196468
LGG	Caushi.CD4-Treg	1.50772	5.24963e-05	0.000104993	0.835661	0.00401281	0.00689259
LGG	Li.CD8.DYS	1.1686	0.000271055	0.000460164	0.842205	0.000978082	0.00216708
LGG	Oh.CD8.CD39	1.51694	7.08097e-06	1.96712e-05	0.843468	0.00129583	0.00252254
LGG	Oliveira_Tumor Spec_TET	1.26446	3.06107e-05	6.57229e-05	0.848159	0.000280315	0.000757887
LGG	Oliveira_TET	1.38579	3.98253e-06	1.23713e-05	0.853199	0.000213522	0.000623485
LGG	Caushi.CD8.Effector(I)	1.39124	1.54334e-06	5.7645e-06	0.853607	0.000137194	0.000417299
LGG	Wang_OS Benefit	1.36129	6.78314e-06	1.96712e-05	0.857371	0.000392346	0.00097089
LGG	Krishna.ACT.CD8.Term.Diff	1.37859	7.68589e-10	2.24428e-08	0.85898	5.18299e-07	1.19815e-05
LGG	Caushi.CD4CD8(II)	1.43989	2.51623e-05	5.83127e-05	0.867218	0.000994482	0.00216708
LGG	Caushi.CD8.CD4CD8(II)	1.43989	2.51623e-05	5.83127e-05	0.867218	0.000994482	0.00216708
LGG	Wu_OS Pancreatic CA	1.46825	7.38123e-08	6.73537e-07	0.870023	3.31137e-05	0.000138131
LGG	Caushi.CD8.Effector(II)	1.44384	2.98825e-08	3.80982e-07	0.870186	2.27822e-05	0.00010708
LGG	Oliveira_EMT	1.35067	7.13836e-06	1.96712e-05	0.875603	0.000111951	0.000371475
LGG	Caushi.CD8.Effector(III)	1.33736	3.3311e-07	1.69506e-06	0.881773	1.69689e-05	8.54295e-05
LGG	Caushi.CD8-Effector(2)	1.45296	1.49428e-07	1.14051e-06	0.882822	4.34384e-05	0.000171406
LGG	Zou_Immune Rxn HCC	1.14745	1.14559e-06	4.68192e-06	0.889017	1.81869e-06	2.96992e-05
LGG	Zheng_Exhau T Cell	1.44575	6.25301e-05	0.00012337	0.896258	0.00116437	0.00235971
LGG	Caushi.CD8.TRM(III)	1.51804	1.25513e-08	1.93489e-07	0.906361	1.038e-05	7.21657e-05
LGG	Oh.CD4.GZMB	1.48344	7.24137e-09	1.32155e-07	0.908057	4.24869e-06	4.13539e-05
LGG	Oh.CD4IL2RALO	1.5644	5.59965e-07	2.47742e-06	0.914017	0.000128969	0.000402461
LGG	Caushi.CD8.TRM(II)	1.49625	1.53665e-05	3.86811e-05	0.95599	0.000331902	0.000865317
LGG	Yost_CD8 Act/Exh	1.54547	1.08532e-06	4.6605e-06	0.956938	8.89438e-05	0.000316727
LGG	Caushi.CD4-Th(2)	1.36934	3.2243e-07	1.69506e-06	0.961413	2.41937e-06	3.21116e-05
LGG	Caushi.CD8.TRM(V)	1.51801	1.34655e-07	1.13638e-06	0.9809	1.1415e-05	7.57544e-05
LGG	Caushi.CD4-Th(3)	1.75002	4.56856e-09	1.11168e-07	0.990233	6.34857e-06	5.14939e-05
LGG	An_CervicalCA	1.4167	3.40483e-08	3.82388e-07	1.00133	5.74457e-07	1.19815e-05
LGG	TOX_Scott	1.56311	1.6188e-06	5.7645e-06	1.00668	0.000100184	0.00034826
LGG	Tang_Ferroptosis	1.17359	0.00175812	0.00249209	1.02017	0.000847775	0.00196468
LGG	Caushi.CD4-Th(1)	1.60817	3.36691e-07	1.69506e-06	1.04334	1.51687e-05	7.90941e-05
LGG	Oliveira_Tumor Spec_Prolif T	1.50303	2.50821e-07	1.46479e-06	1.05876	3.67902e-06	4.13182e-05
LGG	Yost_CD8 Exh	1.78698	4.84159e-07	2.24276e-06	1.06356	8.79288e-05	0.000316727
LGG	Oh.CD8.FGFBP2	1.69517	1.41178e-10	5.15298e-09	1.09129	1.05499e-07	3.85072e-06
LGG	Oh.CD4.TH17	1.70908	1.71447e-07	1.19196e-06	1.09718	1.31927e-05	7.90584e-05
LGG	Liu_Hypoxia	1.81321	2.10524e-07	1.33637e-06	1.12115	4.21287e-05	0.000170855
LGG	Caushi.CD8-Effector(1)	1.88314	3.69304e-08	3.85131e-07	1.12406	1.50092e-05	7.90941e-05
LGG	Caushi.MAIT	1.96747	1.56234e-07	1.14051e-06	1.15016	4.69456e-05	0.00018037
LGG	Caushi.CD4-Tfh(2)	1.70114	2.86102e-07	1.60657e-06	1.15062	7.42611e-06	5.70638e-05
LGG	Zheng_TREG	1.70973	1.15444e-06	4.68192e-06	1.17259	1.40789e-05	7.90584e-05
LGG	Caushi.CD8.Proliferating	1.95535	1.08208e-13	7.89915e-12	1.25252	3.15474e-10	2.30296e-08
LGG	Caushi.CD8.MAIT	1.92425	1.40101e-07	1.13638e-06	1.26053	5.05403e-06	4.6118e-05
LGG	Caushi.CD8-Proliferating	2.08997	5.24927e-16	7.66393e-14	1.3469	6.31785e-12	9.22406e-10
LGG	Yang_PD1Hi_Checkpoint	1.98446	1.19962e-10	5.15298e-09	1.39115	6.23355e-09	3.03366e-07
LGG	Exhaust_2_Feldman	1.94042	3.01421e-06	9.77945e-06	1.47451	4.18653e-06	4.13539e-05
LGG	Jansen_Term diff	2.63114	5.8701e-08	5.71356e-07	1.8026	2.03419e-06	2.96992e-05
LIHC	Caushi.Stem-like memory	-1.03655	0.00135315	0.018037	-0.982595	0.000266798	0.00290659
LIHC	Mel_Exhaust_Tirosh	-0.788197	0.00225434	0.0219423	-0.944685	1.27117e-05	0.00185591
LIHC	Caushi.CD8.Stem-like memory	-1.0595	0.00100204	0.018037	-0.91496	0.000694512	0.00366018
LIHC	Oliveira_TET	-0.565302	0.0581766	0.134822	-0.908446	0.00033978	0.00318241
LIHC	Zhang CD8 TCS	-0.86449	0.00881317	0.0514689	-0.893225	0.00141597	0.00558735
LIHC	Lowery_NeoTCR8	-0.594269	0.0470731	0.119751	-0.892713	0.000392351	0.00318241
LIHC	Caushi.CD8.Effector(III)	-0.660412	0.00761521	0.0489008	-0.870355	3.37153e-05	0.00246122
LIHC	Oliveira_TM	-0.375992	0.331569	0.488028	-0.845987	0.00943038	0.0186059
LIHC	Caushi.CD4-Tfh(1)	-0.903695	0.00803849	0.0489008	-0.840204	0.00322807	0.00899238
LIHC	Oliveira_Tumor Spec_Pro_Exhaust	-0.389525	0.231449	0.371335	-0.831589	0.00275823	0.00856813
LIHC	Caushi.CD8.TRM(VI)	-0.539555	0.0429338	0.112338	-0.831528	0.000218394	0.00290659
LIHC	Krishna.ACT.CD8.Stem.Like	-0.588122	0.0356932	0.10218	-0.828552	0.000437381	0.00336092
LIHC	Oh.CD4.CXCL13	-0.836393	0.0114716	0.0548444	-0.825121	0.00326436	0.00899238
LIHC	Oliveira_Tumor Spec_EM	-0.394142	0.220826	0.362254	-0.8004	0.00319112	0.00899238
LIHC	Li.CD8.DYS	-0.529713	0.0527937	0.126359	-0.790119	0.000701952	0.00366018
LIHC	Caushi.MAIT	-0.581437	0.0625706	0.140543	-0.786962	0.00290486	0.00883562
LIHC	Yost_CD8 Eff mem	-0.449581	0.0754068	0.164319	-0.785991	0.000242899	0.00290659
LIHC	Oh.CD4.CM	-0.67567	0.0382783	0.106541	-0.782732	0.0043036	0.0110233
LIHC	Oh.CD8.CM	-0.965048	0.0110005	0.0548444	-0.779468	0.0136289	0.0258418
LIHC	Jansen_Stem like	-0.930093	0.00134281	0.018037	-0.773167	0.00120374	0.00507912
LIHC	Caushi.CD8-TRM(2)	-0.55729	0.026794	0.083793	-0.755049	0.000349896	0.00318241
LIHC	Oliveira_Tumor Spec_TET	-0.276884	0.335364	0.488028	-0.749275	0.00219891	0.00729639
LIHC	Caushi.CD8-TRM(1)	-0.542962	0.0246424	0.0817679	-0.738293	0.000271291	0.00290659
LIHC	Caushi.CD8-Effector(3)	-0.553434	0.0163189	0.062699	-0.737329	0.000144554	0.00290659
LIHC	Yost_CD8_Memory	-0.797511	0.00138698	0.018037	-0.7359	0.000378323	0.00318241
LIHC	Mem_Eff_6_Feldman	-0.768832	0.00213941	0.0219423	-0.729295	0.000477107	0.00348288
LIHC	Oh.CD8.FGFBP2	-0.246091	0.326213	0.48608	-0.724315	0.000740339	0.00372722
LIHC	Oliveira_EMT	-0.603768	0.0263329	0.083793	-0.714016	0.00158462	0.00578385
LIHC	Caushi.CD4-Th(1)	-0.676322	0.00610575	0.044572	-0.70768	0.000622909	0.00366018
LIHC	Caushi.CD8.TRM(IV)	-0.622206	0.00398784	0.0313782	-0.703752	0.000103136	0.00290659
LIHC	B16_PROG.EX_Miller	-0.594502	0.0564369	0.1329	-0.699711	0.00841655	0.0168331
LIHC	Caushi.CD8.MAIT	-0.552518	0.0605242	0.138071	-0.693242	0.0046553	0.0115199
LIHC	Oh.CD8.Naive	-0.513559	0.0770888	0.165514	-0.691326	0.00442985	0.011151
LIHC	Caushi.CD4CD8(I)	-0.752895	0.00408347	0.0313782	-0.691238	0.00154917	0.00578385
LIHC	Caushi.CD8.CD4CD8(I)	-0.752895	0.00408347	0.0313782	-0.691238	0.00154917	0.00578385
LIHC	Mem_Eff_4_Feldman	-0.933049	0.00148249	0.018037	-0.689403	0.00393342	0.010493
LIHC	Zheng_Exhau T Cell	-0.393573	0.14787	0.274809	-0.683569	0.00264496	0.00839487
LIHC	Oh.CD4.GZMB	-0.369064	0.121166	0.230798	-0.681583	0.000793436	0.00386139
LIHC	Caushi.CD4-Treg	-0.456148	0.113482	0.226964	-0.681145	0.00512579	0.0120788
LIHC	Oh.CD4.GZMK	-0.487766	0.038676	0.106541	-0.655472	0.000926515	0.00426514
LIHC	Oh.CD4IL2RALO	-0.321754	0.265001	0.410155	-0.651826	0.00699399	0.0147667
LIHC	Caushi.CD8-Effector(1)	-0.631856	0.0163123	0.062699	-0.645701	0.00324698	0.00899238
LIHC	Oliveira_Tumor Spec_AAT	-0.329375	0.326273	0.48608	-0.642726	0.0220786	0.0379806
LIHC	Caushi.CD4-Tfh(2)	-0.38413	0.171058	0.290401	-0.641075	0.00666925	0.0143193
LIHC	Exhaust_3_Feldman	-0.533982	0.0106931	0.0548444	-0.640976	0.000278714	0.00290659
LIHC	Caushi.CD8.TRM(II)	-0.360905	0.15454	0.274809	-0.640974	0.00298774	0.00890226
LIHC	Oh.CD4.TH17	-0.134038	0.635604	0.773318	-0.640513	0.0070799	0.0147667
LIHC	Yuan_Hypoxia	-0.351316	0.0946097	0.19455	-0.636996	0.000558113	0.00366018
LIHC	Caushi.CD8.Effector(I)	-0.575097	0.0342448	0.0999947	-0.635672	0.00565191	0.0128934
LIHC	LCMV_TERMN.EX_Miller	-0.10837	0.732834	0.825103	-0.610546	0.022112	0.0379806
LIHC	Yost_CD8 Act/Exh	-0.354927	0.158109	0.274809	-0.595464	0.00479922	0.0116781
LIHC	Yost_CD8 Exh	-0.195173	0.494347	0.638714	-0.584913	0.0147316	0.0272254
LIHC	Caushi.CD8.TRM(I)	-0.219985	0.402992	0.544761	-0.579576	0.0106422	0.0207169
LIHC	Grog.8EFF	-0.3929	0.0303385	0.0922257	-0.575771	0.00018582	0.00290659
LIHC	Caushi.CD4-Th(2)	-0.274452	0.244232	0.383418	-0.573145	0.00395284	0.010493
LIHC	Oh.CD8.CD39	-0.0963726	0.687614	0.803134	-0.558278	0.00616906	0.0136926
LIHC	Yost_CD8 Activated	-0.498423	0.0893157	0.186287	-0.557431	0.0228711	0.0388277
LIHC	Grog.8chrom	-0.597795	0.0102821	0.0548444	-0.545193	0.00512937	0.0120788
LIHC	CD8_G_Feldman	-0.720799	0.0104875	0.0548444	-0.543177	0.0205739	0.0366316
LIHC	Caushi.CD8.Effector(II)	-0.368641	0.0680413	0.150515	-0.529309	0.00201673	0.00701054
LIHC	Oh.CD8.XCL	-0.517678	0.0235355	0.0817679	-0.527588	0.00618979	0.0136926
LIHC	Guo_Exhau CD8	-0.114241	0.653791	0.782405	-0.526435	0.0143053	0.0267767
LIHC	Lowery_NeoTCR4	-0.249985	0.317154	0.482338	-0.522103	0.0136142	0.0258418
LIHC	Grog.8Trm.2	-0.367533	0.0475724	0.119751	-0.519363	0.000934824	0.00426514
LIHC	Caushi.CD4CD8(II)	-0.393808	0.121722	0.230798	-0.516561	0.0160154	0.0288673
LIHC	Caushi.CD8.CD4CD8(II)	-0.393808	0.121722	0.230798	-0.516561	0.0160154	0.0288673
LIHC	Grog.8Trm.1	-0.550046	0.0118375	0.0548444	-0.508438	0.0053527	0.0124047
LIHC	Grog.8Trm.3	-0.245316	0.150901	0.274809	-0.50407	0.000558523	0.00366018
LIHC	Grog.8EM	-0.462181	0.00787453	0.0489008	-0.496689	0.000619886	0.00366018
LIHC	Yost_Naive	-0.229711	0.377795	0.52298	-0.495673	0.0237333	0.0398283
LIHC	Grog.CD4.IL6ST	-0.222562	0.379698	0.52298	-0.483614	0.0216408	0.0379806
LIHC	Caushi.CD8-Effector(2)	-0.341607	0.103046	0.208955	-0.470471	0.0078214	0.0158601
LIHC	Caushi.CD8-MHCII	-0.170904	0.406705	0.544761	-0.46552	0.00770416	0.0158424
LIHC	Yan_TCS	-0.391576	0.0123963	0.0548444	-0.453227	0.000655276	0.00366018
LIHC	Yan_CD8 IFN Gamma	-0.391576	0.0123963	0.0548444	-0.453227	0.000655276	0.00366018
LIHC	Guo_Exhau CD4	-0.293331	0.223518	0.362596	-0.446211	0.0279502	0.0443558
LIHC	Hanada_Reactive T Cell NSCLC	-0.209585	0.266882	0.410155	-0.434132	0.00657491	0.0143193
LIHC	Grog.CD4.FOS	-0.357024	0.120854	0.230798	-0.433322	0.0243608	0.0404168
LIHC	Ghatalia_T Cell Inflation RCC	-0.311168	0.0430886	0.112338	-0.428117	0.00101745	0.00450146
LIHC	Chen_Recurrent Papillary Thyroid	-0.345213	0.0309524	0.0922257	-0.424997	0.00184295	0.00656269
LIHC	Bao_MSI vs. MSS	-0.114251	0.589968	0.7362	-0.413333	0.0257278	0.0417362
LIHC	Duhen_Tumor React CD8	-0.349224	0.0165363	0.0639696	-0.386341	0.00154069	0.00554615
LIHC	Grog.8KLRB1	-0.279755	0.15782	0.274809	-0.374556	0.0273442	0.0438709
LIHC	Chatani_TP	-0.288306	0.0497772	0.123178	-0.352754	0.00413936	0.0107919
LIHC	Grog.Treg.1	-0.17623	0.357004	0.506044	-0.348944	0.0287195	0.0450865
LIHC	Caushi.CD8-Proliferating	0.594255	0.014488	0.0604358	0.454047	0.0249668	0.0409568
LIHC	Exhaust_1_Feldman	0.60189	0.000385722	0.0128664	0.517284	0.000276423	0.00290659
LIHC	Krishna.ACT.CD8.Term.Diff	0.626205	0.00306786	0.0279943	0.538419	0.00233773	0.00758464
LIHC	Oh.CD8.PRO	0.610991	0.00037968	0.0128664	0.564516	9.50965e-05	0.00290659
LIHC	An_CervicalCA	1.02083	2.34901e-06	0.000342956	0.579498	0.00125239	0.00507912
LIHC	Oliveira_Prolif_T	0.651632	0.000210806	0.0128664	0.588644	6.37758e-05	0.00290659
LIHC	Oh.CD4.PROLIF	0.661729	0.00044063	0.0128664	0.597689	0.000154138	0.00290659
LIHC	Caushi.CD8.Proliferating	0.814354	0.00181609	0.0203961	0.704399	0.00122277	0.00507912
LUAD	Zhang CD8 TCS	-1.01043	7.38238e-05	0.00155689	-0.813511	0.000406804	0.056031
LUAD	Mem_Eff_6_Feldman	-0.571431	0.00210863	0.020524	-0.364375	0.0295857	0.359959
LUAD	Oh.CD8.PRO	0.525912	0.000113055	0.0016506	0.315047	0.00917225	0.133915
LUAD	Exhaust_1_Feldman	0.539094	7.61066e-05	0.00155689	0.326553	0.0067023	0.132397
LUAD	Oliveira_Prolif_T	0.541273	0.00010766	0.0016506	0.328081	0.00816144	0.132397
LUAD	Krishna.ACT.CD8.Term.Diff	0.579909	0.00068837	0.00837517	0.30068	0.0489799	0.51079
LUAD	Oh.CD4.PROLIF	0.59605	5.99669e-05	0.00155689	0.352171	0.00751151	0.132397
LUAD	Mo_Hypoxia	0.645205	7.65644e-06	0.000437825	0.346296	0.00732775	0.132397
LUAD	Caushi.CD8.Proliferating	0.668746	0.000931498	0.0104614	0.466708	0.0111577	0.148093
LUAD	Grog.8Mit	0.733681	3.60084e-05	0.00131431	0.437162	0.00608173	0.132397
LUAD	Qi_TREG	-0.153697	0.214349	0.481461	-0.232276	0.0402894	0.452481
LUAD	An_CervicalCA	0.78873	5.69211e-06	0.000437825	0.482874	0.00191522	0.0932073
LUAD	Liu_Hypoxia	0.929873	8.53092e-05	0.00155689	0.617034	0.00434017	0.132397
LUAD	Ahuluwalia_Prognostic Cell Death	1.11211	8.9964e-06	0.000437825	0.77647	0.000767548	0.056031
LUAD	Duhen_Tumor React CD8	-0.328127	0.0080949	0.0599969	-0.196999	0.0932342	0.622974
LUSC	Dai_Activation CD4 CD8	-0.106979	0.520351	0.875141	-0.424273	0.0322201	0.999148
MESO	Exhaust_1_Feldman	1.38126	5.86199e-09	5.21477e-07	0.933397	0.000167429	0.00640528
MESO	Oh.CD8.PRO	1.3851	1.07153e-08	5.21477e-07	0.963282	0.000175487	0.00640528
MESO	Oliveira_Prolif_T	1.46822	9.48209e-09	5.21477e-07	1.04835	9.24022e-05	0.00640528
MESO	Oh.CD4.PROLIF	1.49305	1.47851e-08	5.39655e-07	1.04719	0.000163489	0.00640528
MESO	Krishna.ACT.CD8.Term.Diff	1.5015	1.004e-07	2.93167e-06	0.99095	0.00169269	0.0411888
MESO	Caushi.CD8-Proliferating	1.60085	3.8151e-06	6.96256e-05	1.23862	0.00143295	0.0411888
MESO	Caushi.CD8.Proliferating	1.83158	1.48735e-06	3.1022e-05	1.29946	0.00230738	0.0481254
OV	Wang_OS Benefit	-0.121123	0.57786	0.771836	-0.410777	0.0421131	0.889889
OV	Oh.CD4.Activate	0.218892	0.242696	0.626739	0.358884	0.0430236	0.889889
OV	Oliveira_AAT	0.35223	0.14284	0.606907	0.688704	0.00262861	0.383776
PAAD	Wang_Cytokine Exp	0.503322	0.0144694	0.0645005	0.556764	0.00347753	0.0188044
PAAD	Oh.CD8.Naive	0.527106	0.08496	0.187227	0.723406	0.01474	0.047823
PAAD	Grog.CD4.Trm	0.550917	0.0306408	0.104011	0.595539	0.0117491	0.042275
PAAD	Grog.8Mit	0.60918	0.0111126	0.0523366	0.636185	0.00563111	0.0241807
PAAD	Caushi.CD8.TRM(II)	0.610568	0.0376623	0.116994	0.76817	0.00732668	0.0297138
PAAD	Grog.8chrom	0.655399	0.0176946	0.0738118	0.657368	0.0118718	0.042275
PAAD	Oh.CD8.CD39	0.688789	0.0313331	0.104011	0.879277	0.00408693	0.0194413
PAAD	Mo_Hypoxia	0.697031	0.000417924	0.00508474	0.642067	0.000500887	0.00365647
PAAD	Hou_T Cell Prolif	0.718309	0.0029376	0.0225731	0.839717	0.000345276	0.00280057
PAAD	Oliveira_Tumor Spec_TET	0.720866	0.0432295	0.125254	0.882517	0.0101425	0.0400217
PAAD	Oh.TIL_CD4IL2RAHI	0.722144	0.00635012	0.0370847	0.668718	0.00627796	0.026188
PAAD	Caushi.CD8.TRM(VI)	0.729292	0.0310516	0.104011	0.925839	0.00449225	0.0204959
PAAD	Oh.TIL_CD4.GZMB	0.738547	0.0169836	0.0729295	0.80761	0.00528062	0.0233628
PAAD	Yost_CD8 Activated	0.738574	0.023924	0.0919186	0.750495	0.0153266	0.0486453
PAAD	Guo_Exhau CD8	0.744614	0.0313459	0.104011	0.804789	0.0125117	0.043493
PAAD	Exhaust_1_Feldman	0.767698	0.00015164	0.00309842	0.71416	0.00020069	0.00229331
PAAD	Oh.CD8.PRO	0.770453	0.000190999	0.00309842	0.712872	0.000274535	0.00235777
PAAD	Oliveira_Prolif_T	0.796097	0.000176941	0.00309842	0.764853	0.000157665	0.00209264
PAAD	Yang_PD1Hi_Checkpoint	0.823595	0.0104923	0.0523366	0.863362	0.00376208	0.0189401
PAAD	Oh.CD4.HSP	0.83275	0.00974091	0.0507919	0.742902	0.0135745	0.0450426
PAAD	CD8_B_Feldman	0.842728	0.010825	0.0523366	0.795739	0.0111754	0.0418361
PAAD	Liu_Hypoxia	0.847325	0.0049668	0.0315284	0.915914	0.00129607	0.00901074
PAAD	Oh.CD8.CM	0.848375	0.0145789	0.0645005	1.17425	0.000459557	0.00353134
PAAD	Oh.TIL_CD4IL2RALO	0.85064	0.00457593	0.0303675	0.85166	0.0020789	0.0131965
PAAD	Oliveira_Tumor Spec_AAT	0.854665	0.0330566	0.10725	0.973744	0.0106676	0.040986
PAAD	Oliveira_Tumor Spec_EM	0.873053	0.0251131	0.0940132	1.08967	0.00331925	0.0186389
PAAD	Oh.CD4.PROLIF	0.875802	0.000141621	0.00309842	0.860194	8.91173e-05	0.00144568
PAAD	Oh.CD8.FGFBP2	0.887151	0.0186702	0.0757181	0.889188	0.0134108	0.0450426
PAAD	Guo_Activated Treg	0.887304	0.00743975	0.041777	0.947512	0.00263189	0.0153702
PAAD	Caushi.CD8.TRM(III)	0.97681	0.00394103	0.0287696	1.18978	0.000234439	0.00229331
PAAD	Krishna.ACT.CD8.Term.Diff	1.05297	0.000113783	0.00309842	1.03954	4.9221e-05	0.00108597
PAAD	An_CervicalCA	1.08237	5.54342e-05	0.00202335	1.14191	7.10899e-06	0.000259478
PAAD	Guo_Supp Treg	1.09838	0.00879715	0.0475698	1.12529	0.00412795	0.0194413
PAAD	Caushi.CD8.TRM(I)	1.10985	0.00143848	0.012354	1.37636	5.20672e-05	0.00108597
PAAD	Oliveira_TM	1.18121	0.00433394	0.0301312	1.48104	0.000251322	0.00229331
PAAD	Oh.CD4IL2RALO	1.18844	0.00108466	0.0113115	0.973506	0.00373566	0.0189401
PAAD	Exhaust_2_Feldman	1.1923	0.00227467	0.0184501	1.14837	0.00202193	0.0131965
PAAD	Zheng_TREG	1.21299	0.00528297	0.0321381	1.26999	0.00237094	0.0144232
PAAD	TOX_Scott	1.29763	0.00133533	0.0121849	1.42707	0.000241075	0.00229331
PAAD	Oliveira_Tumor Spec_Prolif T	1.31333	0.000237666	0.00346992	1.30728	8.85909e-05	0.00144568
PAAD	Caushi.CD4-Th(3)	1.31508	0.00120357	0.0117147	1.5957	4.32842e-05	0.00108597
PAAD	Ahuluwalia_Prognostic Cell Death	1.32078	0.000408093	0.00508474	1.29112	0.000208479	0.00229331
PAAD	Caushi.CD8-Proliferating	1.33889	3.02152e-05	0.00147047	1.3366	5.74471e-06	0.000259478
PAAD	Caushi.CD8.Proliferating	1.36181	2.51445e-05	0.00147047	1.40019	4.12412e-06	0.000259478
PAAD	Jansen_Term diff	1.44531	0.000951087	0.0106814	1.57081	0.000149285	0.00209264
PAAD	Wu_OS Pancreatic CA	1.7763	2.10668e-08	3.07576e-06	1.45745	2.07601e-07	3.03098e-05
PCPG	Zhang CD8 TCS	-6.24199	0.0221497	0.406611	-3.76982	0.00214275	0.312842
PCPG	Wu_OS Pancreatic CA	-0.136933	0.921918	0.928276	1.71135	0.0372218	0.988066
PRAD	Tang_Ferroptosis	-0.262194	0.862045	0.922498	1.88595	9.19742e-05	0.00167853
PRAD	Zhang CD8 TCS	-0.174879	0.892955	0.922498	-1.18777	0.00325444	0.0475148
PRAD	Oliveira_Tumor Spec_Prolif T	0.931579	0.462202	0.725608	1.60501	4.55433e-05	0.00110822
PRAD	Oh.CD4.PROLIF	1.24881	0.140501	0.725608	1.22505	1.88322e-06	0.000243489
PRAD	Oh.CD8.PRO	1.27004	0.101118	0.725608	1.01266	6.22736e-06	0.000243489
PRAD	Oliveira_Prolif_T	1.37017	0.0938087	0.725608	0.997735	1.73003e-05	0.000505168
PRAD	Exhaust_1_Feldman	1.38301	0.0833024	0.725608	1.00892	5.49222e-06	0.000243489
PRAD	Caushi.CD8-Proliferating	1.41058	0.204474	0.725608	1.33197	6.14025e-05	0.00128068
PRAD	Krishna.ACT.CD8.Term.Diff	1.49785	0.128437	0.725608	1.32487	6.67094e-06	0.000243489
PRAD	Caushi.CD8.Proliferating	1.52599	0.181855	0.725608	1.31085	0.000133084	0.00215891
READ	Ahuluwalia_Prognostic Cell Death	0.165135	0.840801	0.981548	-1.43142	0.0412539	0.668532
SARC	Tang_Ferroptosis	-1.39883	0.00220507	0.0384022	-0.738477	0.0479485	0.636408
SARC	Oh.CD8.PRO	0.386685	0.0350262	0.0774821	0.434429	0.00516908	0.228654
SARC	Exhaust_1_Feldman	0.399396	0.0301447	0.0698591	0.439148	0.0047885	0.228654
SARC	Oliveira_Prolif_T	0.426701	0.0247411	0.0622792	0.45838	0.00424998	0.228654
SARC	An_CervicalCA	0.564563	0.0245326	0.0622792	0.564242	0.00783062	0.228654
SARC	Wu_OS Pancreatic CA	-0.0179685	0.95069	0.965672	0.502871	0.0368378	0.537832
SARC	Caushi.CD8-Proliferating	0.231611	0.38385	0.448336	0.514557	0.024362	0.395206
SARC	Grog.8Mit	0.294892	0.233699	0.288122	0.487021	0.0189364	0.345589
SARC	Krishna.ACT.CD8.Term.Diff	0.301488	0.196185	0.249775	0.488243	0.0135508	0.282631
SARC	Caushi.CD8.Proliferating	0.383771	0.163556	0.213206	0.589836	0.0123204	0.282631
SARC	Oh.CD4.PROLIF	0.403088	0.050019	0.0901576	0.4633	0.00778499	0.228654
SKCM	Guo_Supp Treg	-1.96074	0.0134379	0.140084	-1.98457	0.00427314	0.0297085
SKCM	Yost_CD8 Exh	-1.77638	0.0140554	0.140084	-1.67314	0.00770159	0.036272
SKCM	Yost_CD8 Activated	-1.7554	0.0216872	0.140084	-1.81877	0.0066226	0.0333414
SKCM	Zheng_Exhau T Cell	-1.72713	0.0128103	0.140084	-1.46314	0.0128053	0.0479377
SKCM	Krishna.ACT.CD8.Stem.Like	-1.71306	0.0222883	0.140084	-1.8238	0.00556392	0.0305405
SKCM	Oh.CD8.FGFBP2	-1.63697	0.0237565	0.140084	-1.73559	0.00564789	0.0305405
SKCM	Oliveira_Tumor Spec_Pro_Exhaust	-1.61823	0.0253064	0.140084	-2.14982	0.0013735	0.0226075
SKCM	Lowery_NeoTCR4	-1.61148	0.0205821	0.140084	-1.77378	0.0041935	0.0297085
SKCM	Oliveira_Tumor Spec_EM	-1.56979	0.0301476	0.140084	-2.13585	0.00158604	0.0226075
SKCM	Lowery_NeoTCR8	-1.55024	0.0184554	0.140084	-1.89565	0.00172382	0.0226075
SKCM	Oh.CD4IL2RAHI	-1.44051	0.029997	0.140084	-1.68487	0.00516916	0.0305405
SKCM	Caushi.CD8.TRM(III)	-1.42324	0.0114295	0.140084	-1.7092	0.00077342	0.0226075
SKCM	Guo_Exhau CD8	-1.37963	0.0250614	0.140084	-1.52552	0.00551817	0.0305405
SKCM	Oh.CD4.Activate	-1.36495	0.0431227	0.142966	-1.58004	0.00862569	0.0381621
SKCM	Guo_Activated Treg	-1.32597	0.0373687	0.140084	-1.57964	0.00511483	0.0305405
SKCM	Mel_Exhaust_Tirosh	-1.32058	0.0311228	0.140084	-1.38368	0.0122756	0.047164
SKCM	Oliveira_Tumor Spec_TET	-1.28626	0.0381044	0.140084	-1.79456	0.0020601	0.0226075
SKCM	Oh.TIL_CD4.GZMB	-1.25009	0.0267694	0.140084	-1.47779	0.00384804	0.0297085
SKCM	Oliveira_TET	-1.22347	0.0395213	0.140084	-1.55306	0.00511559	0.0305405
SKCM	Liu_Treg	-1.22318	0.0253533	0.140084	-1.26918	0.00419631	0.0297085
SKCM	Oh.CD4.GZMB	-1.09109	0.0434214	0.142966	-1.57831	0.0014993	0.0226075
SKCM	Grog.Treg.1	-1.03611	0.0257119	0.140084	-1.346	0.00216784	0.0226075
SKCM	Grog.Treg.2	-0.940542	0.0310721	0.140084	-1.566	0.000192004	0.0226075
SKCM	Grog.8EFF	-0.87692	0.0353327	0.140084	-1.10971	0.00413206	0.0297085
SKCM	Grog.8Trm.3	-0.844001	0.024537	0.140084	-1.1511	0.00101496	0.0226075
SKCM	Yan_TCS	-0.731965	0.0285631	0.140084	-0.977284	0.00195402	0.0226075
SKCM	Yan_CD8 IFN Gamma	-0.731965	0.0285631	0.140084	-0.977284	0.00195402	0.0226075
SKCM	Grog.CD4.IL6ST	-1.13474	0.0625453	0.168215	-2.00556	0.000859851	0.0226075
SKCM	Yost_CD8 Eff mem	-1.07871	0.0656028	0.168215	-1.36525	0.0112786	0.0463765
SKCM	Caushi.CD8-TRM(1)	-1.06532	0.0502546	0.149006	-1.38103	0.00701057	0.0341181
SKCM	Caushi.CD8.Effector(III)	-1.04816	0.0663857	0.168215	-1.35203	0.0104953	0.0450679
SKCM	Oh.TIL_CD4IL2RAHI	-0.98629	0.0501747	0.149006	-1.43533	0.00183896	0.0226075
SKCM	Oliveira_TM	-0.966416	0.240344	0.335013	-2.22317	0.00337639	0.0297085
SKCM	Caushi.CD4-Th(3)	-0.942681	0.12713	0.226855	-1.69377	0.0024666	0.0240082
SKCM	Hanada_Reactive T Cell NSCLC	-0.848557	0.095532	0.211117	-1.17926	0.0115658	0.0463765
SKCM	Oliveira_EMT	-0.766608	0.240934	0.335013	-1.77372	0.00616074	0.0321238
SKCM	Grog.CD4.Trm	-0.764031	0.0609189	0.168215	-1.32712	0.00033943	0.0226075
SKCM	Grog.8Trm.2	-0.731722	0.0692512	0.169744	-0.920062	0.011753	0.0463765
SKCM	Zhang CD8 TCS	-0.470567	0.521035	0.602371	-1.95863	0.00823218	0.0375593
STAD	Liu_Treg	-0.731212	0.000587008	0.0857032	-0.732389	0.00133431	0.0389617
STAD	Oliveira_Prolif_T	-0.358684	0.0161282	0.727629	-0.514489	0.00114403	0.0389617
STAD	Oh.CD8.PRO	-0.338353	0.0197723	0.727629	-0.516821	0.000810562	0.0389617
STAD	Oh.CD4.PROLIF	-0.334474	0.0299026	0.727629	-0.551205	0.000826397	0.0389617
STAD	Exhaust_1_Feldman	-0.319151	0.0251652	0.727629	-0.49336	0.00110426	0.0389617
STAD	Oliveira_Tumor Spec_Prolif T	-0.414717	0.0815552	0.988692	-0.778281	0.00265391	0.0484338
STAD	Caushi.CD8.Proliferating	-0.394634	0.0714099	0.988692	-0.727206	0.0020394	0.0440215
STAD	Krishna.ACT.CD8.Term.Diff	-0.330577	0.067597	0.988692	-0.593804	0.00211062	0.0440215
TGCT	Hou_T Cell Prolif	2.56782	0.131129	0.485373	0.966486	0.0390773	0.995725
THCA	Oh.CD4.PROLIF	-0.636023	0.268409	0.817081	1.18336	0.0012756	0.0465594
THCA	Exhaust_1_Feldman	-0.110512	0.823879	0.939737	1.02229	0.00112473	0.0465594
THCA	Oliveira_Prolif_T	-0.100179	0.851426	0.942019	1.1478	0.000727646	0.0465594
THCA	Oh.CD8.PRO	-0.0605979	0.905297	0.948804	1.11435	0.000535374	0.0465594
THYM	Oh.CD8.CM	-1.31383	0.358932	0.540247	2.52185	0.0102681	0.130679
THYM	Grog.8chrom	-0.0584929	0.959159	0.972481	1.90437	0.0191068	0.138712
THYM	Oh.TIL_CD4.GZMB	0.284489	0.743346	0.865005	1.18355	0.0401571	0.138712
THYM	Yost_CD8 Activated	0.569906	0.689114	0.831493	2.01506	0.0367993	0.138712
THYM	Grog.Treg.1	0.805856	0.293964	0.487713	1.04468	0.0373879	0.138712
THYM	Oh.CD8.HSP	0.859813	0.502176	0.654622	1.71797	0.0384213	0.138712
THYM	Grog.Treg.2	0.89107	0.218765	0.394318	1.06839	0.0264203	0.138712
THYM	CD8_B_Feldman	0.902385	0.316336	0.502011	1.20799	0.0417745	0.138712
THYM	Oh.CD4.HSP	0.9449	0.46256	0.630914	1.77124	0.0436553	0.138712
THYM	Grog.CD4.FOS	1.09816	0.243661	0.428608	1.20287	0.0443064	0.138712
THYM	Ghatalia_T Cell Inflation RCC	1.17526	0.11838	0.29294	1.16017	0.0193243	0.138712
THYM	Dai_Activation CD4 CD8	1.21407	0.172738	0.355508	1.63392	0.00593298	0.130679
THYM	Oh.CD4.GZMK	1.2337	0.313194	0.502011	1.77011	0.0322842	0.138712
THYM	Li_Immune Inf	1.31838	0.167188	0.353759	1.36553	0.0323524	0.138712
THYM	Caushi.CD8-Effector(1)	1.36911	0.349768	0.537538	2.09279	0.0355473	0.138712
THYM	Mel_Exhaust_Tirosh	1.52651	0.190637	0.366223	1.56787	0.0356432	0.138712
THYM	Guo_Exhau CD8	1.55231	0.138421	0.325959	1.5233	0.0266338	0.138712
THYM	Yost_CD8 Eff mem	1.59191	0.186964	0.363957	1.78894	0.0231771	0.138712
THYM	Exhaust_3_Feldman	1.59303	0.13544	0.324169	1.45731	0.0286093	0.138712
THYM	Guo_Supp Treg	1.96776	0.14101	0.326785	1.86185	0.0310309	0.138712
THYM	Caushi.CD4CD8(II)	2.00734	0.180875	0.36175	2.01198	0.0429081	0.138712
THYM	Caushi.CD8.CD4CD8(II)	2.00734	0.180875	0.36175	2.01198	0.0429081	0.138712
THYM	Oh.CD4IL2RALO	2.06035	0.112593	0.288396	2.19096	0.00953566	0.130679
THYM	Oliveira_Tumor Spec_TET	2.08577	0.11834	0.29294	1.95941	0.023974	0.138712
THYM	Yost_CD8 Act/Exh	2.28718	0.0778315	0.236737	2.14129	0.00915414	0.130679
THYM	Yost_Naive	2.56997	0.159663	0.353194	3.14913	0.0066625	0.130679
THYM	Caushi.CD8.TRM(V)	2.70634	0.0574712	0.1907	1.86591	0.0324576	0.138712
THYM	Oliveira_Tumor Spec_AAT	2.85835	0.0592163	0.190872	2.19088	0.0261139	0.138712
THYM	Caushi.CD4-Tfh(2)	2.99132	0.0717426	0.22286	2.77569	0.0139446	0.135728
THYM	Chatani_TP	1.62996	0.0422347	0.154157	1.21113	0.0214251	0.138712
THYM	Oh.CD4IL2RAHI	2.30188	0.0445104	0.154726	1.54661	0.0340852	0.138712
THYM	Yan_TCS	2.3994	0.00951344	0.130627	1.10403	0.0121005	0.130679
THYM	Yan_CD8 IFN Gamma	2.3994	0.00951344	0.130627	1.10403	0.0121005	0.130679
THYM	Li_Pyroptosis	2.45896	0.00455328	0.128991	1.18322	0.0125309	0.130679
THYM	Caushi.CD8-Effector(2)	2.48368	0.041853	0.154157	1.68377	0.0225537	0.138712
THYM	Li.CD8.DYS	2.51212	0.0192023	0.134764	1.56076	0.0227335	0.138712
THYM	Guo_Exhau CD4	2.60111	0.0443808	0.154726	1.8628	0.0327344	0.138712
THYM	Caushi.CD8.Effector(II)	2.80318	0.03174	0.138265	1.54731	0.0310676	0.138712
THYM	Oh.CD8.CD39	2.9215	0.030481	0.138265	1.50336	0.0490375	0.146112
THYM	Caushi.CD4-Treg	3.21967	0.0309926	0.138265	2.02753	0.0446539	0.138712
THYM	Zheng_Exhau T Cell	3.77436	0.00923057	0.130627	2.13939	0.0105602	0.130679
THYM	Caushi.CD8-Effector(3)	4.03515	0.0110001	0.130627	1.45315	0.043628	0.138712
THYM	Caushi.CD8.Effector(III)	4.04854	0.00740547	0.130627	1.35964	0.0471023	0.14327
THYM	Yost_CD8 Exh	4.0802	0.017541	0.134764	2.13422	0.0266356	0.138712
THYM	Oliveira_Pro_Exhaust	4.2855	0.0230761	0.134764	3.2981	0.00693412	0.130679
THYM	Zou_Immune Rxn HCC	4.3892	0.000345552	0.0504506	2.20021	0.00120191	0.130679
THYM	Zheng_TREG	4.97878	0.0122145	0.130627	3.80246	0.00323555	0.130679
THYM	Oh.CD4.TH17	5.05924	0.00489203	0.128991	2.80421	0.00792935	0.130679
THYM	Ahuluwalia_Prognostic Cell Death	5.40514	0.0101319	0.130627	3.90703	0.00230821	0.130679
UCEC	Oh.CD4.CM	-1.40552	0.000572013	0.00517739	-1.27701	0.000206763	0.00233356
UCEC	Oliveira_Tumor Spec_EM	-1.3847	0.000266424	0.00517739	-1.25429	8.95332e-05	0.00160849
UCEC	Oh.CD8.MAIT	-1.28854	5.00888e-05	0.00365648	-1.04267	9.15871e-05	0.00160849
UCEC	Caushi.CD8.Effector(I)	-1.25286	0.000761943	0.00517739	-1.15426	0.000223766	0.00233356
UCEC	Lowery_NeoTCR8	-1.22475	0.000529111	0.00517739	-1.03002	0.000484561	0.00336885
UCEC	Exhaust_2_Feldman	-1.1847	0.00225267	0.00913584	-0.842471	0.00985612	0.0202675
UCEC	Oliveira_Tumor Spec_Pro_Exhaust	-1.17437	0.00211388	0.00902149	-0.941436	0.00351745	0.0100696
UCEC	Caushi.CD8.TRM(VI)	-1.17284	0.000196462	0.00517739	-1.06989	5.43978e-05	0.00160849
UCEC	Oh.CD8.FGFBP2	-1.11766	0.00119527	0.00581696	-1.13653	9.91533e-05	0.00160849
UCEC	Caushi.CD4-Treg	-1.09715	0.0037575	0.0109719	-0.816666	0.0102238	0.0206937
UCEC	Lowery_NeoTCR4	-1.09014	0.000986027	0.00517739	-0.842583	0.00234306	0.00905555
UCEC	Grog.8KLRB1	-1.08307	2.97057e-05	0.00365648	-0.877167	5.3739e-05	0.00160849
UCEC	Caushi.CD8.MAIT	-1.07658	0.00814661	0.0194927	-1.19651	0.000567711	0.00357729
UCEC	Caushi.CD8.TRM(IV)	-1.07631	8.37653e-05	0.00407658	-0.990697	1.70997e-05	0.00160849
UCEC	Zheng_TREG	-1.05653	0.0126925	0.0261001	-0.853807	0.0157489	0.0287418
UCEC	Caushi.CD8-Effector(1)	-1.05595	0.00306483	0.0107833	-0.94724	0.00162001	0.00716731
UCEC	Caushi.CD8-TRM(2)	-1.05009	0.000837542	0.00517739	-0.949894	0.000319204	0.00283052
UCEC	Yost_CD8 Exh	-1.04642	0.00269388	0.0103502	-0.891834	0.00241895	0.00905555
UCEC	Grog.CD4.IL6ST	-1.03121	0.000259755	0.00517739	-0.838125	0.000424387	0.00326108
UCEC	Oh.CD4IL2RAHI	-1.02862	0.00242032	0.00955047	-0.751491	0.00771996	0.016335
UCEC	Yost_CD8_Memory	-1.02737	0.000871083	0.00517739	-0.770404	0.00272737	0.00926038
UCEC	Jansen_Stem like	-1.02701	0.00314203	0.0107833	-1.02983	0.000463789	0.00336885
UCEC	Oh.TIL_CD4.GZMK	-1.02283	0.00089126	0.00517739	-0.718381	0.005347	0.013011
UCEC	Caushi.CD4-Th(3)	-1.01638	0.00363918	0.0108433	-1.00778	0.000595255	0.00357729
UCEC	Yost_CD8 Act/Exh	-1.01056	0.00213789	0.00902149	-0.866272	0.00179467	0.00727839
UCEC	Oh.CD8.CD39	-0.999828	0.000921159	0.00517739	-0.811953	0.0013908	0.00634553
UCEC	Mel_Exhaust_Tirosh	-0.989458	0.00104336	0.00525277	-0.746493	0.00307616	0.00973643
UCEC	LCMV_PROG.EX_Miller	-0.987923	0.0380226	0.0652715	-0.931238	0.0223355	0.0378174
UCEC	Caushi.CD4CD8(II)	-0.984957	0.00326979	0.0107833	-0.814776	0.00387461	0.0104758
UCEC	Caushi.CD8.CD4CD8(II)	-0.984957	0.00326979	0.0107833	-0.814776	0.00387461	0.0104758
UCEC	Caushi.CD8.TRM(III)	-0.980956	0.000875759	0.00517739	-0.98776	6.68059e-05	0.00160849
UCEC	Caushi.CD4-Tfh(2)	-0.974615	0.0070261	0.0170968	-0.898707	0.00346782	0.0100696
UCEC	Caushi.CD4-Th(1)	-0.953986	0.00460497	0.0124505	-0.89297	0.00169045	0.00725899
UCEC	Caushi.CD8.TRM(II)	-0.943224	0.00306717	0.0107833	-0.891628	0.000981112	0.00462072
UCEC	Oh.CD4.GZMK	-0.938328	0.00158133	0.00744757	-0.755612	0.0023703	0.00905555
UCEC	Li.CD8.DYS	-0.928684	0.000992924	0.00517739	-0.807112	0.00072707	0.00379115
UCEC	Guo_Exhau CD8	-0.906883	0.00401124	0.0114832	-0.62963	0.0171457	0.0299905
UCEC	Oliveira_EMT	-0.904741	0.00607375	0.0155573	-1.044	0.000210197	0.00233356
UCEC	Oliveira_TET	-0.901568	0.00605553	0.0155573	-0.73323	0.00760966	0.016335
UCEC	Oh.CD4.GZMB	-0.897015	0.00182765	0.00833865	-0.874091	0.000364087	0.00295315
UCEC	Caushi.CD4-Tfh(1)	-0.887995	0.0302408	0.0525614	-0.775499	0.0269947	0.0433101
UCEC	Hanada_Reactive T Cell NSCLC	-0.883881	0.000644314	0.00517739	-0.729192	0.000866504	0.00427679
UCEC	Yost_CD8 Eff mem	-0.879403	0.00471025	0.0125036	-0.736361	0.00497655	0.0123149
UCEC	Oh.CD4.CXCL13	-0.877242	0.0256179	0.0461755	-0.862595	0.0103469	0.0206937
UCEC	Caushi.CD8.TRM(V)	-0.863767	0.0103491	0.0225518	-0.68906	0.0154014	0.0284633
UCEC	Grog.8chrom	-0.858151	0.00343784	0.0107833	-0.599159	0.0147767	0.0280182
UCEC	Oh.CD8.XCL	-0.855184	0.00347133	0.0107833	-0.819331	0.000878793	0.00427679
UCEC	Oh.TIL_CD4.GZMB	-0.852293	0.00295317	0.0107833	-0.643582	0.00751208	0.016335
UCEC	Caushi.CD8-Effector(3)	-0.849828	0.00420167	0.011797	-0.746607	0.00270669	0.00926038
UCEC	Caushi.CD8-Effector(2)	-0.846028	0.00216269	0.00902149	-0.730836	0.00174876	0.00727839
UCEC	Caushi.CD4CD8(I)	-0.824251	0.00942782	0.0215072	-0.760829	0.0049409	0.0123149
UCEC	Caushi.CD8.CD4CD8(I)	-0.824251	0.00942782	0.0215072	-0.760829	0.0049409	0.0123149
UCEC	Caushi.CD8-TRM(1)	-0.823965	0.00827771	0.0194927	-0.793116	0.00259201	0.00926038
UCEC	Caushi.CD8.Effector(III)	-0.82389	0.00666556	0.0164944	-0.756349	0.00313433	0.00973643
UCEC	Oliveira_Tumor Spec_TET	-0.819211	0.0188754	0.0357898	-0.636893	0.0291692	0.0457925
UCEC	Grog.8EM	-0.818195	0.000263312	0.00517739	-0.67915	0.000329581	0.00283052
UCEC	Grog.Treg.2	-0.803935	0.00098695	0.00517739	-0.593327	0.00364928	0.0102461
UCEC	Grog.Treg.1	-0.798383	0.000954196	0.00517739	-0.554507	0.00595971	0.0142642
UCEC	Grog.8EFF	-0.797673	0.000467837	0.00517739	-0.714415	0.000192025	0.00233356
UCEC	Zheng_Exhau T Cell	-0.787337	0.0168388	0.0327796	-0.6361	0.022535	0.0378174
UCEC	Grog.8Trm.2	-0.786511	0.000412982	0.00517739	-0.686513	0.000243554	0.00237059
UCEC	Oh.TIL_CD4IL2RALO	-0.769607	0.0064696	0.0162856	-0.632637	0.00764628	0.016335
UCEC	Grog.8Trm.3	-0.768361	0.000323988	0.00517739	-0.733651	5.22357e-05	0.00160849
UCEC	Caushi.CD8.Effector(II)	-0.736978	0.0045484	0.0124505	-0.654983	0.00293208	0.00951296
UCEC	Caushi.CD4-Th(2)	-0.67699	0.0270258	0.0481191	-0.710545	0.00660554	0.0154443
UCEC	Chen_Recurrent Papillary Thyroid	-0.669233	0.000632679	0.00517739	-0.645349	0.000132433	0.00193352
UCEC	Grog.8Trm.1	-0.659761	0.0166975	0.0327796	-0.696132	0.00287443	0.00951296
UCEC	Yan_TCS	-0.647555	0.000580367	0.00517739	-0.53845	0.000661554	0.00357729
UCEC	Yan_CD8 IFN Gamma	-0.647555	0.000580367	0.00517739	-0.53845	0.000661554	0.00357729
UCEC	Ghatalia_T Cell Inflation RCC	-0.645504	0.000511515	0.00517739	-0.622991	7.88528e-05	0.00160849
UCEC	Chatani_TP	-0.610249	0.00081996	0.00517739	-0.540067	0.000533252	0.00353885
UCEC	Bao_MSI vs. MSS	-0.582843	0.0110955	0.0238227	-0.471958	0.0149724	0.0280253
UCEC	Grog.CD4.Trm	-0.559766	0.0232004	0.0428767	-0.721341	0.00064837	0.00357729
UCEC	Duhen_Tumor React CD8	-0.563597	0.00225078	0.00648755	-0.478383	0.00249435	0.0101853
UCEC	Grog.CD4.TCF7	-0.539945	0.00362047	0.0108433	-0.383685	0.0143381	0.0275443
UCEC	Caushi.CD8-MHCII	-0.530602	0.0475637	0.0798196	-0.596932	0.00887507	0.0185109
UCEC	Li_Pyroptosis	-0.507348	0.0156707	0.0317766	-0.38531	0.0282853	0.0448875
UCEC	Oh.CD8.PRO	0.50319	0.018561	0.0356566	0.531378	0.00328436	0.00998993
UCEC	Oliveira_Prolif_T	0.533244	0.0159098	0.0318196	0.534446	0.00414393	0.0110003
UCEC	Exhaust_1_Feldman	0.5399	0.0117196	0.0247981	0.506759	0.00470823	0.012275
UCEC	Oliveira_TM	-0.817475	0.070222	0.105695	-0.916337	0.0165416	0.0295715
UCEC	Caushi.CD8.Stem-like memory	-0.78457	0.0655501	0.10205	-0.808231	0.0253335	0.0420306
UCEC	Caushi.MAIT	-0.770047	0.0659683	0.10205	-1.05704	0.00348981	0.0100696
UCEC	Caushi.Stem-like memory	-0.757942	0.0650664	0.10205	-0.786829	0.0259108	0.0425054
UCEC	Yost_CD8 Activated	-0.697887	0.050826	0.084325	-0.718419	0.0174602	0.0299905
UCEC	LCMV_TERMN.EX_Miller	-0.646147	0.0976473	0.13977	-0.917238	0.0067701	0.0154443
UCEC	Oh.CD4.TH17	-0.644612	0.070158	0.105695	-0.726319	0.0166087	0.0295715
UCEC	Yost_Naive	-0.599623	0.0774856	0.115438	-0.646563	0.0264959	0.0429822
UCEC	Oh.CD8.Naive	-0.572985	0.0950245	0.137362	-0.69136	0.0172671	0.0299905
UCEC	Liu_Treg	-0.454834	0.0993665	0.14085	-0.578587	0.0135141	0.0263074
UCEC	Wang_Cytokine Exp	-0.330225	0.132967	0.184887	-0.506182	0.00675537	0.0154443
UCEC	Wu_OS Pancreatic CA	-0.2974	0.336151	0.419471	-0.719322	0.00691826	0.0155395
UCEC	Oh.CD4.PROLIF	0.418634	0.0565738	0.0928065	0.470196	0.0114066	0.0225048
UCS	Dai_Activation CD4 CD8	-0.564001	0.147362	0.98737	-0.845346	0.0359115	0.999641
UCS	Oh.CD8.MITO	0.399025	0.191694	0.98737	0.646552	0.0406269	0.999641
UVM	Shi_TCS	-2.05644	0.0037879	0.0067443	-2.57423	7.03854e-05	0.00268131
UVM	Grog.CD4.TCF7	-1.23574	0.00185158	0.00368578	-1.28463	0.000400974	0.00843285
UVM	Oh.CD8.RPL	-1.16434	0.00285375	0.0051438	-1.15961	0.00107617	0.0120863
UVM	Grog.CD4.RPL32	-1.078	0.00402536	0.00699646	-1.14485	0.00091256	0.0111028
UVM	Oh.CD4.PROLIF	1.19548	0.0282821	0.0389547	1.8713	0.000404315	0.00843285
UVM	Krishna.ACT.CD8.Term.Diff	2.0508	0.00115222	0.00265279	2.45379	3.89551e-05	0.00268131
UVM	Caushi.CD8-Effector(2)	2.18266	2.62082e-05	0.000658303	1.19017	0.00706685	0.0448591
UVM	Caushi.CD8.Effector(II)	2.18846	2.72506e-05	0.000658303	1.1464	0.00584431	0.0422142
UVM	Yang_PD1Hi_Checkpoint	2.4535	0.000139599	0.000754867	1.7191	0.00353295	0.0297423
UVM	Wu_OS Pancreatic CA	2.62484	0.000315658	0.00109445	2.45001	0.00022261	0.00650021
UVM	Oliveira_Tumor Spec_Prolif T	2.62889	0.00420345	0.00722004	2.14251	0.0060055	0.0422142
UVM	Caushi.CD8.TRM(III)	2.88439	1.21154e-05	0.000658303	1.39956	0.00300075	0.0273818
UVM	Caushi.CD8.Proliferating	2.95504	0.000301061	0.00109445	3.01404	6.6098e-05	0.00268131
UVM	Caushi.CD8-Effector(1)	2.97954	3.21104e-05	0.000658303	1.73554	0.00366686	0.0297423
UVM	Exhaust_2_Feldman	2.99439	5.78693e-05	0.000658303	2.06067	0.00156135	0.0162827
UVM	Caushi.CD8-Proliferating	3.25446	4.1167e-05	0.000658303	2.81736	7.34605e-05	0.00268131
UVM	Caushi.CD8.TRM(I)	3.43258	0.000139342	0.000754867	1.97939	0.00625325	0.0422142
UVM	Grog.8KLRB1	-0.292639	0.653621	0.681633	-1.67931	0.00636104	0.0422142
UVM	Exhaust_1_Feldman	0.89652	0.0587853	0.0739884	1.62426	0.000870777	0.0111028
UVM	Oh.CD8.PRO	0.919107	0.0560327	0.0717612	1.66424	0.000737138	0.0111028
UVM	Oliveira_Prolif_T	0.962538	0.0598791	0.074721	1.75261	0.000819016	0.0111028
UVM	TOX_Scott	4.06203	4.12528e-05	0.000658303	2.6456	0.00197684	0.0192412
UVM	Jansen_Term diff	4.15523	0.00010307	0.000732328	3.50306	0.000517505	0.00944446

## Sheet: Supp T7
Cluster	res.km1.cluster	PC1	PC2	OS_Coef	PF_Coef	OS_P	PF_P
Bao_MSI vs. MSS	1	-50.7112	-11.0022	0.276641	0.102853	5.26738e-05	0.115751
Caushi.CD8.Effector(II)	1	-41.9476	-36.1587	0.351516	0.309289	8.30637e-13	1.73598e-11
Caushi.CD8.TRM(IV)	1	-56.9563	-12.3787	-0.13183	-0.190954	0.0477892	0.00264573
Caushi.CD8-Effector(2)	1	-48.2911	-25.6943	0.180775	0.0683927	0.00423082	0.251502
Chatani_TP	1	-88.6689	-33.4697	-0.0237278	-0.0318117	0.544995	0.392602
Chen_Recurrent Papillary Thyroid	1	-51.9656	-39.13	-0.185111	-0.247812	0.000686669	1.75743e-06
Duhen_Tumor React CD8	1	-84.3244	-11.603	-0.153665	-0.201139	0.00573449	0.000139178
Exhaust_3_Feldman	1	-55.743	-35.1854	-0.221799	-0.293717	0.00164084	1.32727e-05
Hanada_Reactive T Cell NSCLC	1	-45.97	-22.5681	-0.0196646	-0.108511	0.743813	0.0574362
Qi_TREG	1	-52.9616	-48.7881	-0.146951	-0.233443	0.00915548	1.20573e-05
Ahuluwalia_Prognostic Cell Death	2	26.8896	30.9887	-0.0525565	-0.11337	0.310908	0.0203745
An_CervicalCA	2	48.0075	34.6144	0.180327	0.0860035	0.00154561	0.107055
Hou_T Cell Prolif	2	32.7623	56.7353	-0.131558	-0.183595	0.0295394	0.00144668
Liu_Hypoxia	2	45.0449	33.574	-0.185111	-0.247812	0.000686669	1.75743e-06
Mo_Hypoxia	2	69.9614	19.7754	-0.153665	-0.201139	0.00573449	0.000139178
Wang_Cytokine Exp	2	31.7496	15.2159	-0.0181539	-0.0983667	0.750723	0.070571
Wu_OS Pancreatic CA	2	26.8005	20.088	-0.0967646	-0.111097	0.0296374	0.00835127
B16_PROG.EX_Miller	3	-23.9043	33.9798	-0.069475	-0.1465	0.172424	0.00231834
B16_TERMINAL.EX_Miller	3	-14.6158	15.0865	-0.0314035	-0.118251	0.639294	0.0616923
Caushi.CD4CD8(I)	3	-37.2253	28.0876	0.317688	0.425356	1.46023e-08	1.00064e-15
Caushi.CD4CD8(II)	3	-33.277	12.6056	-0.247989	-0.312541	0.000728617	7.54529e-06
Caushi.CD4-Tfh(1)	3	-18.4852	37.1923	0.12041	0.0189301	0.0427179	0.735789
Caushi.CD4-Tfh(2)	3	-19.2809	17.693	-0.0399695	-0.116245	0.459438	0.023533
Caushi.CD4-Th(1)	3	-30.3816	29.9932	0.056954	-0.00127208	0.251862	0.978291
Caushi.CD4-Treg	3	-27.2978	15.5771	-0.191723	-0.219423	1.57488e-05	1.93389e-07
Caushi.CD8.CD4CD8(I)	3	-37.2253	28.0876	-0.0241265	-0.0517524	0.66539	0.325865
Caushi.CD8.CD4CD8(II)	3	-33.277	12.6056	-0.131525	-0.177954	0.0134614	0.000417054
Caushi.CD8.Effector(I)	3	-19.1988	18.0173	-0.117079	-0.161849	0.0437439	0.00321062
Caushi.CD8.MAIT	3	-7.99324	21.9197	-0.123712	-0.140377	0.00739349	0.00132063
Caushi.CD8.Stem-like memory	3	-12.5084	44.1905	-0.124362	-0.171522	0.0135027	0.000305546
Caushi.CD8.TRM(I)	3	0.63504	32.687	0.0250358	-0.0468969	0.582983	0.275244
Caushi.MAIT	3	-8.5773	36.2364	0.308493	0.382855	1.49184e-08	9.7163e-14
Caushi.Stem-like memory	3	-22.7544	39.0893	-0.090635	-0.147061	0.0823204	0.00279682
Early.Act_5_Feldman	3	-9.23192	64.1727	-0.115129	-0.159505	0.0278397	0.00124777
Exhaust_2_Feldman	3	4.0851	29.2758	-0.0661401	-0.19636	0.335549	0.00251005
Guo_Exhau CD4	3	-31.3367	16.9337	-0.329901	-0.392167	1.86015e-06	2.97521e-09
Jansen_Stem like	3	-32.3131	45.7013	-0.0551491	-0.0969456	0.166833	0.0100625
Jansen_Term diff	3	12.7483	20.5185	-0.00892362	0.0122992	0.867088	0.807335
KH_sig	3	-16.6429	25.688	0.00424757	-0.110823	0.942551	0.0485511
LCMV_PROG.EX_Miller	3	1.80344	33.1536	-0.15688	-0.14269	1.21564e-06	3.39371e-06
LCMV_TERMN.EX_Miller	3	-3.90109	14.749	-0.124847	-0.123056	0.000419003	0.000251788
Mem_Eff_6_Feldman	3	-51.1152	28.5198	0.174274	0.118171	5.64129e-05	0.00398174
Oh.CD4.CM	3	20.2231	20.4608	-0.133642	-0.125523	4.58135e-05	5.44353e-05
Oh.CD4.CXCL13	3	-15.2072	35.7603	-0.0475335	-0.147021	0.442565	0.0124864
Oh.CD8.CM	3	18.39	39.3838	0.262953	0.321811	1.22409e-12	3.70311e-20
Oliveira_EMT	3	-24.4569	20.3899	0.0613599	-0.0183786	0.385446	0.783483
Oliveira_Pro_Exhaust	3	6.40329	18.2902	-0.135824	-0.150337	0.00085562	0.00010265
Oliveira_TM	3	22.6158	27.5819	0.0244024	-0.0865351	0.675444	0.119377
Tang_Ferroptosis	3	12.9751	26.2897	-0.125584	-0.129547	0.000106615	2.4664e-05
Wang_OS Benefit	3	0.894731	38.1995	-0.0796094	-0.10833	0.107931	0.0200992
Yang_Cuproptosis	3	17.288	16.4452	-0.0732549	-0.120057	0.056513	0.000928578
Yost_Naive	3	-4.37302	34.017	-0.124069	-0.141519	0.000976747	6.71637e-05
Zhang CD8 TCS	3	-4.38583	50.4988	-0.134717	-0.160157	0.00260396	0.00015772
Zhang_CD8 Infiltration	3	13.7115	15.7021	0.175067	0.221348	7.62636e-05	1.44265e-07
Caushi.CD8.Proliferating	4	55.6251	-28.9002	-0.0560179	-0.105016	0.206686	0.0120599
Caushi.CD8-Proliferating	4	42.7192	-40.9751	-0.105542	-0.131803	0.00602649	0.000295562
Exhaust_1_Feldman	4	100.926	-53.1311	-0.0590656	-0.0964062	0.113125	0.00609418
Krishna.ACT.CD8.Term.Diff	4	66.638	-44.0258	0.021708	-0.0670184	0.631404	0.117068
Oh.CD4.PROLIF	4	98.4319	-47.7126	-0.110398	-0.140073	0.032849	0.00433761
Oh.CD8.PRO	4	98.3636	-49.5634	-0.0292661	-0.0120074	0.376506	0.700807
Oliveira_Prolif_T	4	95.7549	-46.4047	-0.0315966	-0.0236037	0.344871	0.45583
Oliveira_Tumor Spec_Prolif T	4	52.6102	-31.2822	0.138966	0.102484	0.000921673	0.00922734
CD3.MT	5	-16.6607	46.0137	-0.0419064	-0.0611255	0.332453	0.130816
CD8_G_Feldman	5	-5.23159	76.0317	0.0257044	0.00215048	0.556223	0.958009
Feldman_CD8_G	5	-2.4302	77.9832	0.0987465	0.0749907	0.0806495	0.160405
Grog.8Trm.1	5	-31.6105	15.51	-0.100914	-0.135207	0.0551033	0.00727062
Grog.CD4.FOS	5	13.2923	59.9962	-0.023428	-0.0466332	0.668474	0.3673
Mem_Eff_4_Feldman	5	-1.47544	69.3946	0.0430509	-0.000946142	0.515796	0.987962
Oh.CD4.Activate	5	9.14325	53.0319	-0.120306	-0.124905	0.00862991	0.0039457
Oh.CD8.HSP	5	40.2723	30.2527	0.206777	0.0829429	1.661e-05	0.0664133
Oliveira_AAT	5	21.8881	47.4078	-0.201198	-0.297069	0.000754528	1.4507e-07
Shi_TCS	5	12.5339	42.7949	0.268151	0.271372	0.00114479	0.000473838
Yost_CD8 Activated	5	7.39505	21.9966	-0.0724222	-0.126137	0.185991	0.0147075
Oh.CD4.MITO	6	39.8711	54.8411	-0.0972674	-0.208295	0.103135	0.000223773
Oh.CD8.MITO	6	44.8948	48.6439	0.286105	0.361208	1.24298e-09	4.55006e-16
Caushi.CD4-Th(2)	7	-26.2874	6.4652	-0.0748567	-0.170938	0.341391	0.0230873
Caushi.CD4-Th(3)	7	7.30315	7.96069	0.0657622	-0.0682089	0.363139	0.314358
Caushi.CD8.Effector(III)	7	-36.39	-6.19168	-0.0974572	-0.136677	0.0584895	0.00532585
Caushi.CD8.TRM(II)	7	-29.2628	3.62715	0.149858	0.0698651	0.00536911	0.167831
Caushi.CD8.TRM(III)	7	-0.406006	-35.615	0.0324168	0.011998	0.400124	0.742956
Caushi.CD8.TRM(V)	7	-19.5275	-9.50049	0.483426	0.393935	1.67299e-14	5.8942e-11
Caushi.CD8.TRM(VI)	7	-22.8434	-14.6792	-0.0357856	-0.0695218	0.475683	0.142647
Caushi.CD8-Effector(1)	7	-26.8363	4.42199	-0.112252	-0.108838	0.0358856	0.031942
Caushi.CD8-Effector(3)	7	-40.3554	-18.4273	-0.16758	-0.174659	0.00738027	0.0030214
Caushi.CD8-MHCII	7	-29.1309	-9.66015	-0.161684	-0.202792	0.00158097	3.11109e-05
Caushi.CD8-TRM(1)	7	-32.5136	-16.1102	-0.0566667	-0.156402	0.360539	0.00743833
Caushi.CD8-TRM(2)	7	-34.0919	-15.3329	-0.241561	-0.280213	7.67595e-07	1.69873e-09
Dai_Activation CD4 CD8	7	3.76441	6.12522	0.227279	0.161529	1.43543e-09	6.18644e-06
Grog.8chrom	7	-29.5991	7.95064	0.0140703	-0.0723697	0.798205	0.164125
Grog.CD4.IL6ST	7	10.946	-22.2281	-0.141214	-0.216599	0.0416159	0.000942891
Grog.Treg.1	7	-13.7254	-39.4769	-0.144963	-0.236113	0.0324031	0.000281151
Guo_Exhau CD8	7	8.90919	-37.8207	-0.0448346	-0.0925466	0.371949	0.0495495
Krishna.ACT.CD8.Stem.Like	7	-15.1805	8.30245	-0.100368	-0.134477	0.0422347	0.00383353
Li.CD8.DYS	7	-31.5485	-10.0199	0.188964	0.0942394	0.00199539	0.103638
Li_Immune Inf	7	4.51479	9.89601	-0.105994	-0.0944608	0.00344722	0.00556012
Li_Pyroptosis	7	-4.31407	6.41311	0.24836	0.329534	8.22261e-10	9.66426e-18
Lowery_NeoTCR4	7	-22.8733	-12.7137	-0.0375349	-0.106962	0.53921	0.0651096
Lowery_NeoTCR8	7	3.24011	-21.5989	-0.112849	-0.159174	0.0625721	0.00524381
Mel_Exhaust_Tirosh	7	-31.3297	-12.7971	0.0241499	-0.0317962	0.674872	0.558512
Oh.CD4.GZMB	7	-22.1944	-25.4169	-0.0571575	-0.105366	0.281785	0.0356452
Oh.CD4.GZMK	7	-27.7453	-22.1604	-0.1164	-0.171765	0.10352	0.0113038
Oh.CD4.TH17	7	-9.23605	10.3705	0.0302772	-0.0552256	0.596279	0.303625
Oh.CD4IL2RAHI	7	-4.86843	-14.5085	0.2182	0.102747	0.000318432	0.0732229
Oh.CD4IL2RALO	7	0.286958	-10.0645	-0.09507	-0.124294	0.0943964	0.0212029
Oh.CD8.CD39	7	-18.9975	-14.5789	-0.100735	-0.0779697	0.00222703	0.0120111
Oh.CD8.FGFBP2	7	-10.4975	-10.4504	-0.0659833	-0.122706	0.260199	0.0275398
Oh.CD8.Naive	7	-0.654583	6.66801	0.260209	0.334843	3.69707e-12	3.53097e-21
Oh.CD8.XCL	7	-16.9582	6.85013	-0.0462838	-0.0357139	0.183709	0.276555
Oliveira_TET	7	-12.99	-17.6258	-0.0711505	-0.0861447	0.131874	0.052528
Oliveira_Tumor Spec_AAT	7	7.40977	9.83899	0.078176	0.0488546	0.117222	0.297169
Oliveira_Tumor Spec_EM	7	6.2285	5.44791	-0.0643735	-0.0417265	0.220532	0.400322
Oliveira_Tumor Spec_Pro_Exhaust	7	2.88825	-7.81081	0.113563	0.0961102	0.0168506	0.0310646
Oliveira_Tumor Spec_TET	7	-4.89923	-12.9352	0.0824978	0.0630726	0.0911778	0.169618
TOX_Scott	7	10.7255	-8.11689	0.0168303	-0.101354	0.813362	0.132194
Yang_PD1Hi_Checkpoint	7	-5.36773	-24.4047	-0.033445	-0.130184	0.547352	0.0129145
Yost_CD8 Act/Exh	7	-20.0676	-17.0389	0.00490905	-0.0564253	0.949712	0.446896
Yost_CD8 Eff mem	7	-25.415	-10.9076	0.267849	0.339312	4.37746e-12	1.93523e-20
Yost_CD8 Exh	7	-13.4792	-4.74842	-0.0895533	-0.143684	0.115318	0.00755103
Yost_CD8_Memory	7	-27.2516	-9.41005	0.136152	0.00704416	0.0692845	0.920474
Yuan_Hypoxia	7	14.1546	-7.59546	0.0101529	-0.0595728	0.882773	0.36016
Zheng_Exhau T Cell	7	-11.2241	-13.8279	-0.0526404	-0.122993	0.425844	0.0484417
Zheng_TREG	7	4.43492	8.38275	-0.0784351	-0.120266	0.246291	0.0605476
Zou_Immune Rxn HCC	7	-24.12	5.65325	0.273775	0.351273	4.99398e-06	6.3406e-10
CD8_B_Feldman	8	39.1434	-48.229	0.00873752	-0.0528532	0.882239	0.341388
Grog.8Mit	8	97.3888	-41.3053	-0.0681197	-0.0700779	0.0371715	0.0232556
Grog.CD4.Trm	8	37.3297	-30.8822	-0.072201	-0.142923	0.0984261	0.000614368
Grog.Treg.2	8	14.4278	-55.3248	-0.33166	-0.193005	7.67113e-05	0.0147283
Guo_Activated Treg	8	60.6703	-24.1297	0.16715	0.181804	0.0130556	0.00428312
Guo_Supp Treg	8	31.9812	-14.2772	0.152294	0.0564024	5.84951e-05	0.114892
Liu_Treg	8	61.3622	-5.20227	-0.050211	-0.190492	0.421665	0.00137663
Oh.CD4.HSP	8	47.8089	5.98289	0.208546	0.139655	0.000100592	0.00538005
Oh.TIL_CD4.GZMB	8	30.0193	-35.7618	-0.0960444	-0.117362	0.00301844	0.000125447
Oh.TIL_CD4IL2RAHI	8	59.1221	-39.6171	-0.0960444	-0.117362	0.00301844	0.000125447
Oh.TIL_CD4IL2RALO	8	39.306	-33.6668	0.0853765	0.149216	0.115782	0.0036967
Ghatalia_T Cell Inflation RCC	9	-73.5943	-66.5926	0.0590018	0.101635	0.273153	0.0458437
Grog.8EFF	9	-44.702	-52.6694	-0.0624989	-0.0883562	0.250814	0.0857696
Grog.8EM	9	-53.9839	-49.4433	0.0796316	-0.0263388	0.179015	0.63771
Grog.8Trm.2	9	-43.9037	-55.396	-0.0785177	-0.163873	0.150954	0.00140178
Grog.8Trm.3	9	-29.8643	-71.3095	-0.042933	-0.10723	0.477783	0.0614775
Yan_CD8 IFN Gamma	9	-60.4632	-84.0117	-0.124512	-0.177698	0.017458	0.000356237
Yan_TCS	9	-60.4632	-84.0117	0.0491301	-0.0437925	0.393906	0.421597
Grog.8KLRB1	10	36.6141	-21.7431	-0.0394289	-0.0867338	0.381028	0.0421195
Grog.CD4.RPL32	10	104.446	-27.2545	-0.446044	-0.570179	4.58582e-10	9.39697e-17
Grog.CD4.TCF7	10	100.712	-16.4667	-0.00900971	-0.0194112	0.872795	0.714516
Oh.CD8.MAIT	10	39.6214	10.4196	-0.0867719	-0.149516	0.135241	0.00679974
Oh.CD8.RPL	10	97.0731	-17.8406	0.0128381	-0.0479809	0.856469	0.476545
Oh.TIL_CD4.GZMK	10	47.8887	-23.5643	-0.103987	-0.126566	0.0380528	0.00738223

## Sheet: Supp T8
Gene Name Ref	Zhang CD8 TCS	Tang_Ferroptosis	B16_PROG.EX_Miller	Krishna.ACT.CD8.Term.Diff	Caushi.CD4-Th(3)	Oh.CD8.HSP	Oh.CD4.MITO	Oh.CD8.MAIT	Caushi.CD8.Stem-like memory	Exhaust_1_Feldman	Wang_Cytokine Exp	Guo_Supp Treg	Liu_Treg	Chatani_TP	Oh.CD4.CM	Shi_TCS	Jansen_Stem like	Oh.CD8.CM	Krishna.ACT.CD8.Stem.Like	LCMV_PROG.EX_Miller	TOX_Scott	Oliveira_TM	Li_Pyroptosis	Caushi.Stem-like memory	Dai_Activation CD4 CD8	Wang_OS Benefit	Oliveira_Tumor Spec_Prolif T	Grog.Treg.1	Sum
TCF7	0	0	1	0	0	0	0	0	1	0	0	0	0	0	1	0	1	0	1	1	0	1	0	1	0	0	0	0	8
IL7R	1	0	0	0	0	0	0	1	1	0	0	0	0	0	0	0	1	0	1	1	0	1	0	1	0	0	0	0	8
CCR7	0	0	0	0	0	0	0	1	1	0	0	0	0	0	1	0	0	1	0	1	0	1	0	1	0	0	0	0	7
GPR183	0	0	0	0	0	0	0	1	1	0	0	0	0	0	1	0	1	1	0	0	0	1	0	1	0	0	0	0	7
KLF3	0	0	1	0	0	0	0	0	1	0	0	0	0	0	1	0	1	0	0	0	0	1	0	1	0	0	0	0	6
PABPC1	0	0	0	0	0	0	0	1	1	0	0	0	0	0	1	0	0	1	0	0	0	0	0	1	0	0	0	0	5
SELL	0	0	1	0	0	0	0	0	1	0	0	0	0	0	1	0	0	1	0	0	0	0	0	1	0	0	0	0	5
LTB	0	0	0	0	0	0	0	1	1	0	0	0	0	0	0	0	0	0	1	0	0	0	0	1	0	0	0	1	5
ENTPD1	0	0	0	1	0	0	0	0	0	0	0	1	0	1	0	0	0	0	0	0	0	0	0	0	0	0	1	0	4
DUSP2	0	0	0	0	0	0	0	0	0	0	0	1	0	0	0	0	0	1	1	0	0	0	0	0	0	1	0	0	4
CD83	0	0	1	0	0	0	0	0	0	0	0	1	0	0	0	0	1	0	0	1	0	0	0	0	0	0	0	0	4
LMNA	0	0	0	0	0	0	0	1	0	0	0	1	0	0	0	0	0	1	0	0	0	1	0	0	0	0	0	0	4
PLAC8	0	0	0	0	0	0	0	0	1	0	0	0	0	0	1	0	1	0	0	0	0	0	0	1	0	0	0	0	4
CD55	0	0	0	0	0	0	0	1	0	0	0	0	0	0	1	0	0	1	1	0	0	0	0	0	0	0	0	0	4
SC5D	0	0	0	0	0	0	0	1	1	0	0	0	0	0	1	0	0	0	0	0	0	0	0	1	0	0	0	0	4
CRYBG1	0	0	0	0	0	0	0	1	0	0	0	0	0	0	1	0	0	1	0	0	0	0	0	1	0	0	0	0	4
CCR6	0	0	1	0	0	0	0	1	0	0	0	0	0	0	0	0	1	0	0	1	0	0	0	0	0	0	0	0	4
S1PR1	0	0	1	0	0	0	0	0	1	0	0	0	0	0	0	0	0	0	0	0	0	1	0	1	0	0	0	0	4
FAM177A1	0	0	0	0	0	0	0	1	1	0	0	0	0	0	0	0	0	1	0	0	0	0	0	1	0	0	0	0	4
EMP3	0	0	0	0	1	0	0	0	1	0	0	0	0	0	0	0	0	0	0	0	0	1	0	1	0	0	0	0	4
P2RY8	0	0	0	0	0	0	0	0	1	0	0	0	0	0	0	0	0	0	1	0	0	1	0	1	0	0	0	0	4
ASPM	0	0	0	1	0	0	0	0	0	1	0	0	0	0	0	0	0	0	0	0	1	0	0	0	0	0	1	0	4
TNFRSF18	0	0	0	1	0	0	0	0	0	0	0	1	0	0	0	0	0	0	0	0	0	0	0	0	0	0	0	1	3
BATF	0	0	0	0	0	0	0	0	0	0	0	1	0	0	0	0	0	0	0	0	0	0	0	0	0	1	0	1	3
CTLA4	0	0	0	0	0	0	0	0	0	0	0	1	0	0	0	0	0	0	0	0	0	0	0	0	1	0	1	0	3
HAVCR2	0	0	0	0	0	0	0	0	0	0	0	1	0	0	0	0	0	0	0	0	1	0	0	0	0	0	1	0	3
PRNP	0	0	0	0	0	0	0	0	1	0	0	1	0	0	0	0	1	0	0	0	0	0	0	0	0	0	0	0	3
HSPB1	0	0	0	0	0	1	0	0	0	0	0	1	0	0	0	0	0	0	0	0	0	0	0	0	0	0	0	1	3
TIGIT	0	0	0	0	0	0	0	0	0	0	0	1	0	1	0	0	0	0	0	0	0	0	0	0	0	0	0	1	3
ID3	0	0	1	0	0	0	0	0	0	0	0	1	0	0	0	0	0	0	0	1	0	0	0	0	0	0	0	0	3
SPOCK2	0	0	0	0	0	0	0	1	0	0	0	1	0	0	0	0	0	0	1	0	0	0	0	0	0	0	0	0	3
ANXA1	0	0	0	0	0	0	0	0	0	0	0	0	0	0	1	0	1	0	0	0	0	1	0	0	0	0	0	0	3
SESN3	0	0	0	0	0	0	0	0	1	0	0	0	0	0	1	0	0	0	0	0	0	0	0	1	0	0	0	0	3
PGAP1	0	0	0	0	0	0	0	0	1	0	0	0	0	0	1	0	0	0	0	0	0	0	0	1	0	0	0	0	3
BEX2	0	0	0	0	0	0	0	0	1	0	0	0	0	0	1	0	0	0	0	0	0	0	0	1	0	0	0	0	3
LEF1	0	0	0	0	0	0	0	0	1	0	0	0	0	0	1	0	0	0	0	0	0	0	0	1	0	0	0	0	3
PASK	0	0	0	0	0	0	0	0	1	0	0	0	0	0	1	0	0	0	0	0	0	0	0	1	0	0	0	0	3
AP3M2	0	0	0	0	0	0	0	0	1	0	0	0	0	0	1	0	0	0	0	0	0	0	0	1	0	0	0	0	3
AIM1	0	0	0	0	0	0	0	1	0	0	0	0	0	0	1	0	0	1	0	0	0	0	0	0	0	0	0	0	3
EEF1B2	0	0	0	0	0	0	0	1	0	0	0	0	0	0	1	0	0	1	0	0	0	0	0	0	0	0	0	0	3
KLF2	0	0	0	0	0	0	0	0	0	0	0	0	0	0	1	0	0	1	1	0	0	0	0	0	0	0	0	0	3
ARID5A	0	0	0	0	0	0	0	0	0	0	0	0	0	0	1	0	0	1	0	0	0	0	0	1	0	0	0	0	3
RPS12	0	0	0	0	0	0	0	1	0	0	0	0	0	0	1	0	0	1	0	0	0	0	0	0	0	0	0	0	3
GLTSCR2	0	0	0	0	0	0	0	1	0	0	0	0	0	0	1	0	0	1	0	0	0	0	0	0	0	0	0	0	3
TMEM66	0	0	0	0	0	0	0	1	0	0	0	0	0	0	1	0	0	1	0	0	0	0	0	0	0	0	0	0	3
RASGRP2	0	0	0	0	0	0	0	0	0	0	0	0	0	0	1	0	0	0	1	0	0	0	0	1	0	0	0	0	3
SLC2A3	0	0	0	0	0	0	0	0	1	0	0	0	0	0	1	0	0	0	0	0	0	0	0	1	0	0	0	0	3
NOP53	0	0	0	0	0	0	0	1	0	0	0	0	0	0	1	0	0	1	0	0	0	0	0	0	0	0	0	0	3
CD69	1	0	0	1	0	1	0	0	0	0	0	0	0	0	0	0	0	0	0	0	0	0	0	0	0	0	0	0	3
MAL	1	0	0	0	0	0	0	0	1	0	0	0	0	0	0	0	0	0	0	0	0	0	0	1	0	0	0	0	3
TNFSF14	0	0	1	0	0	1	0	0	0	0	0	0	0	0	0	0	1	0	0	0	0	0	0	0	0	0	0	0	3
TNFSF8	0	0	1	0	0	0	0	0	1	0	0	0	0	0	0	0	0	0	0	0	0	0	0	1	0	0	0	0	3
XCL1	0	0	1	1	0	0	0	0	0	0	0	0	0	0	0	0	0	0	0	1	0	0	0	0	0	0	0	0	3
TESPA1	0	0	1	0	0	0	0	0	1	0	0	0	0	0	0	0	0	0	0	0	0	0	0	1	0	0	0	0	3
KLRB1	0	0	0	0	0	0	0	1	0	0	0	0	0	0	0	0	1	0	0	0	1	0	0	0	0	0	0	0	3
NOSIP	0	0	0	0	0	0	0	1	1	0	0	0	0	0	0	0	0	0	1	0	0	0	0	0	0	0	0	0	3
RGCC	0	0	0	0	0	0	0	1	1	0	0	0	0	0	0	0	0	1	0	0	0	0	0	0	0	0	0	0	3
BACH2	0	0	0	0	0	0	0	0	1	0	0	0	0	0	0	0	0	0	0	0	0	1	0	1	0	0	0	0	3
PCSK1N	0	0	0	0	0	0	0	0	1	0	0	0	0	0	0	0	0	0	0	0	0	1	0	1	0	0	0	0	3
SAMHD1	0	0	0	0	0	0	0	0	1	0	0	0	0	0	0	0	0	0	1	0	0	0	0	1	0	0	0	0	3
SORL1	0	0	0	0	0	0	0	0	1	0	0	0	0	0	0	0	1	0	0	0	0	0	0	1	0	0	0	0	3
ZWINT	0	0	0	1	0	0	0	0	0	1	0	0	0	0	0	0	0	0	0	0	0	0	0	0	0	0	1	0	3
TK1	0	0	0	1	0	0	0	0	0	1	0	0	0	0	0	0	0	0	0	0	0	0	0	0	0	0	1	0	3
UBE2C	0	0	0	1	0	0	0	0	0	1	0	0	0	0	0	0	0	0	0	0	0	0	0	0	0	0	1	0	3
TYMS	0	0	0	1	0	0	0	0	0	1	0	0	0	0	0	0	0	0	0	0	0	0	0	0	0	0	1	0	3
CDK1	0	0	0	1	0	0	0	0	0	1	0	0	0	0	0	0	0	0	0	0	0	0	0	0	0	0	1	0	3
TOP2A	0	0	0	1	0	0	0	0	0	1	0	0	0	0	0	0	0	0	0	0	0	0	0	0	0	0	1	0	3
MKI67	0	0	0	1	0	0	0	0	0	0	0	0	0	0	0	0	0	0	0	0	1	0	0	0	0	0	1	0	3
CENPF	0	0	0	1	0	0	0	0	0	0	0	0	0	0	0	0	0	0	0	0	1	0	0	0	0	0	1	0	3
S1PR4	0	0	0	0	0	0	0	0	0	0	0	0	0	0	0	0	0	1	1	0	0	1	0	0	0	0	0	0	3
CXCR6	0	0	0	0	1	0	0	0	0	0	0	1	0	0	0	0	0	0	0	0	0	0	0	0	0	0	0	0	2
IL1R2	0	0	0	0	0	0	0	0	0	0	0	1	0	0	0	0	0	0	0	1	0	0	0	0	0	0	0	0	2
CTSC	0	0	0	0	1	0	0	0	0	0	0	1	0	0	0	0	0	0	0	0	0	0	0	0	0	0	0	0	2
CXCR3	0	0	0	0	0	0	0	0	1	0	0	1	0	0	0	0	0	0	0	0	0	0	0	0	0	0	0	0	2
TNFRSF4	0	0	0	0	0	0	0	0	0	0	0	1	0	0	0	0	0	0	0	0	0	0	0	0	0	0	0	1	2
DNPH1	0	0	0	0	0	0	0	0	0	0	0	1	0	0	0	0	0	0	0	0	0	0	0	0	0	0	1	0	2
ICOS	0	0	0	0	0	0	0	0	0	0	0	1	0	0	0	0	0	0	0	0	0	0	0	0	0	0	0	1	2
IGFLR1	0	0	0	0	0	0	0	0	0	0	0	1	0	0	0	0	0	0	0	0	0	0	0	0	0	0	1	0	2
SLAMF1	0	0	0	0	0	0	0	0	0	0	0	1	0	0	0	0	1	0	0	0	0	0	0	0	0	0	0	0	2
PTTG1	0	0	0	0	0	0	0	0	0	0	0	1	0	0	0	0	0	0	0	0	0	0	0	0	0	0	1	0	2
CREM	0	0	0	0	0	0	0	0	0	0	0	1	0	0	0	0	0	1	0	0	0	0	0	0	0	0	0	0	2
CARD16	0	0	0	0	0	0	0	0	0	0	0	1	0	0	0	0	0	0	0	0	0	0	0	0	0	0	0	1	2
PIM2	0	0	0	0	0	0	0	0	0	0	0	1	0	0	0	0	0	0	0	0	0	0	0	0	0	0	0	1	2
TBC1D4	0	0	1	0	0	0	0	0	0	0	0	1	0	0	0	0	0	0	0	0	0	0	0	0	0	0	0	0	2
EPHX2	1	0	0	0	0	0	0	0	0	0	0	1	0	0	0	0	0	0	0	0	0	0	0	0	0	0	0	0	2
TXN	0	0	0	0	1	0	0	0	0	0	0	1	0	0	0	0	0	0	0	0	0	0	0	0	0	0	0	0	2
GPX1	0	0	0	0	0	0	0	0	0	0	0	1	0	0	0	0	0	0	0	0	0	0	0	0	0	0	0	1	2
CD70	0	0	0	0	0	0	0	0	0	0	0	1	0	0	0	0	0	0	0	0	0	0	0	0	0	0	1	0	2
TNFRSF1B	0	0	0	0	0	0	0	0	0	0	0	1	0	0	0	0	0	0	0	0	0	0	0	0	0	0	0	1	2
PHACTR2	0	0	0	0	0	0	0	0	0	0	0	1	0	0	0	0	0	0	1	0	0	0	0	0	0	0	0	0	2
NDFIP2	0	0	0	1	0	0	0	0	0	0	0	1	0	0	0	0	0	0	0	0	0	0	0	0	0	0	0	0	2
CSF1	0	0	0	0	0	0	0	0	0	0	0	1	0	0	0	0	0	0	0	0	0	0	0	0	0	0	1	0	2
SELK	0	0	0	0	0	0	0	0	0	0	0	1	0	0	0	0	0	1	0	0	0	0	0	0	0	0	0	0	2
HLA-DMA	0	0	0	0	0	0	0	0	0	0	0	1	0	0	0	0	0	0	0	0	0	0	0	0	0	0	1	0	2
HSPA1A	0	0	0	0	0	1	0	0	0	0	0	1	0	0	0	0	0	0	0	0	0	0	0	0	0	0	0	0	2
HSP90AB1	0	0	0	0	0	1	0	0	0	0	0	1	0	0	0	0	0	0	0	0	0	0	0	0	0	0	0	0	2
IL18R1	0	0	0	0	0	0	0	0	0	0	0	1	0	0	0	0	1	0	0	0	0	0	0	0	0	0	0	0	2
PSAP	0	0	0	0	0	0	0	0	0	0	0	1	0	0	0	1	0	0	0	0	0	0	0	0	0	0	0	0	2
LTA	0	0	0	0	0	0	0	0	0	0	0	1	0	0	0	0	0	0	0	1	0	0	0	0	0	0	0	0	2
IDI1	0	0	0	0	0	0	0	0	0	0	0	1	0	0	0	0	0	1	0	0	0	0	0	0	0	0	0	0	2
LMCD1	0	0	0	0	0	0	0	0	0	0	0	1	0	0	0	0	0	0	0	0	0	0	0	0	0	0	1	0	2
CKS2	0	0	0	0	0	0	0	0	0	0	0	1	0	0	0	0	0	0	0	0	0	0	0	0	0	0	1	0	2
TNFRSF8	0	0	0	0	0	0	0	0	0	0	0	1	0	0	0	0	0	0	0	0	1	0	0	0	0	0	0	0	2
IL32	0	0	0	0	0	0	0	0	0	0	0	1	0	0	0	0	0	0	0	0	0	0	0	0	0	0	0	1	2
UCP2	0	0	0	0	0	0	0	0	0	0	0	1	0	0	0	0	0	0	0	0	0	0	0	0	0	0	0	1	2
INPP5F	0	0	0	0	0	0	0	0	0	0	0	1	0	0	0	0	0	0	0	0	0	0	0	0	0	0	1	0	2
TOX2	0	0	0	0	0	0	0	0	0	0	0	1	0	0	0	0	0	0	0	0	0	0	0	0	0	0	1	0	2
CORO1B	0	0	0	0	0	0	0	0	0	0	0	1	1	0	0	0	0	0	0	0	0	0	0	0	0	0	0	0	2
CACYBP	0	0	0	0	0	1	0	0	0	0	0	1	0	0	0	0	0	0	0	0	0	0	0	0	0	0	0	0	2
MAST4	0	0	0	0	1	0	0	0	0	0	0	1	0	0	0	0	0	0	0	0	0	0	0	0	0	0	0	0	2
SELENOK	0	0	0	0	0	0	0	0	0	0	0	1	0	0	0	0	0	1	0	0	0	0	0	0	0	0	0	0	2
PDCD1	0	0	0	0	0	0	0	0	0	0	0	0	0	1	0	0	0	0	0	0	0	0	0	0	0	0	1	0	2
ZNF331	0	0	0	0	0	0	0	0	0	0	0	0	0	0	0	1	0	0	0	0	0	0	0	1	0	0	0	0	2
C1orf162	0	0	0	0	0	0	0	0	0	0	0	0	0	0	1	0	0	0	0	0	0	0	0	1	0	0	0	0	2
MYC	0	0	0	0	0	0	0	0	0	0	0	0	0	0	1	0	1	0	0	0	0	0	0	0	0	0	0	0	2
PTGER2	0	0	0	0	0	0	0	0	1	0	0	0	0	0	1	0	0	0	0	0	0	0	0	0	0	0	0	0	2
EEF1A1	0	0	0	0	0	0	0	1	0	0	0	0	0	0	1	0	0	0	0	0	0	0	0	0	0	0	0	0	2
PTGER4	0	0	0	0	0	0	0	0	0	0	0	0	0	0	1	0	0	0	0	0	0	0	0	1	0	0	0	0	2
RPL10	0	0	0	0	0	0	0	1	0	0	0	0	0	0	1	0	0	0	0	0	0	0	0	0	0	0	0	0	2
GIMAP7	0	0	0	0	0	0	0	0	0	0	0	0	0	0	1	0	0	0	0	0	0	0	0	1	0	0	0	0	2
RPS3A	0	0	0	0	0	0	0	1	0	0	0	0	0	0	1	0	0	0	0	0	0	0	0	0	0	0	0	0	2
RPL3	0	0	0	0	0	0	0	1	0	0	0	0	0	0	1	0	0	0	0	0	0	0	0	0	0	0	0	0	2
RNF125	0	0	0	0	0	0	0	0	0	0	0	0	0	0	1	0	0	1	0	0	0	0	0	0	0	0	0	0	2
RPL9	0	0	0	0	0	0	0	1	0	0	0	0	0	0	1	0	0	0	0	0	0	0	0	0	0	0	0	0	2
RPS5	0	0	0	0	0	0	0	1	0	0	0	0	0	0	1	0	0	0	0	0	0	0	0	0	0	0	0	0	2
MBP	0	0	0	0	0	0	0	0	0	0	0	0	0	0	1	0	0	0	0	0	0	1	0	0	0	0	0	0	2
CCDC109B	0	0	0	0	0	0	0	0	0	0	0	0	0	0	1	0	0	0	1	0	0	0	0	0	0	0	0	0	2
MCUB	0	0	0	0	0	0	0	0	0	0	0	0	0	0	1	0	0	0	0	0	0	1	0	0	0	0	0	0	2
AQP3	1	0	0	0	0	0	0	0	0	0	0	0	0	0	0	0	0	0	0	0	0	0	0	1	0	0	0	0	2
FOS	0	0	0	0	0	1	1	0	0	0	0	0	0	0	0	0	0	0	0	0	0	0	0	0	0	0	0	0	2
IFNG	0	0	0	1	0	1	0	0	0	0	0	0	0	0	0	0	0	0	0	0	0	0	0	0	0	0	0	0	2
CCL3	0	0	0	1	0	1	0	0	0	0	0	0	0	0	0	0	0	0	0	0	0	0	0	0	0	0	0	0	2
CXCR5	0	0	1	0	0	0	0	0	0	0	0	0	0	0	0	0	0	0	0	0	0	0	0	1	0	0	0	0	2
DAPL1	0	0	1	0	0	0	0	0	0	0	0	0	0	0	0	0	0	0	0	1	0	0	0	0	0	0	0	0	2
CD22	0	0	1	0	0	0	0	0	0	0	0	0	0	0	0	0	0	0	0	1	0	0	0	0	0	0	0	0	2
2610019F03RIK	0	0	1	0	0	0	0	0	0	0	0	0	0	0	0	0	0	0	0	1	0	0	0	0	0	0	0	0	2
ART3	0	0	1	0	0	0	0	0	0	0	0	0	0	0	0	0	0	0	0	1	0	0	0	0	0	0	0	0	2
PGCP	0	0	1	0	0	0	0	0	0	0	0	0	0	0	0	0	0	0	0	1	0	0	0	0	0	0	0	0	2
SOSTDC1	0	0	1	0	0	0	0	0	0	0	0	0	0	0	0	0	0	0	0	1	0	0	0	0	0	0	0	0	2
FAM160A1	0	0	1	0	0	0	0	0	0	0	0	0	0	0	0	0	0	0	0	1	0	0	0	0	0	0	0	0	2
IL18	0	0	1	0	0	0	0	0	0	0	1	0	0	0	0	0	0	0	0	0	0	0	0	0	0	0	0	0	2
NSG2	0	0	1	0	0	0	0	0	0	0	0	0	0	0	0	0	0	0	0	1	0	0	0	0	0	0	0	0	2
SH3BP5	0	0	1	0	0	0	0	0	0	0	0	0	0	0	0	0	0	0	1	0	0	0	0	0	0	0	0	0	2
TNP2	0	0	1	0	0	0	0	0	0	0	0	0	0	0	0	0	0	0	0	1	0	0	0	0	0	0	0	0	2
CPQ	0	0	1	0	0	0	0	0	0	0	0	0	0	0	0	0	0	0	0	1	0	0	0	0	0	0	0	0	2
TMIGD2	0	0	0	0	1	0	0	1	0	0	0	0	0	0	0	0	0	0	0	0	0	0	0	0	0	0	0	0	2
RORA	0	0	0	0	0	0	0	1	0	0	0	0	0	0	0	0	1	0	0	0	0	0	0	0	0	0	0	0	2
FTH1	0	0	0	0	0	0	0	1	0	0	0	0	0	0	0	0	0	0	0	0	0	1	0	0	0	0	0	0	2
RPLP0	0	0	0	0	0	0	0	1	0	0	0	0	0	0	0	0	0	1	0	0	0	0	0	0	0	0	0	0	2
VIM	0	0	0	0	0	0	0	1	0	0	0	0	0	0	0	0	0	0	0	0	0	1	0	0	0	0	0	0	2
STAT4	0	0	0	0	0	0	0	1	0	0	0	0	0	0	0	0	1	0	0	0	0	0	0	0	0	0	0	0	2
LGALS3	0	0	0	0	1	0	0	0	0	0	0	0	0	0	0	0	0	0	1	0	0	0	0	0	0	0	0	0	2
S100A4	0	0	0	0	1	0	0	0	0	0	0	0	0	0	0	0	0	0	0	0	0	0	0	0	0	0	0	1	2
DPP4	0	0	0	0	1	0	0	0	0	0	0	0	0	0	0	0	1	0	0	0	0	0	0	0	0	0	0	0	2
MT-ND2	0	0	0	0	0	0	1	0	0	0	0	0	0	0	0	0	0	1	0	0	0	0	0	0	0	0	0	0	2
MT-ND1	0	0	0	0	0	0	1	0	0	0	0	0	0	0	0	0	0	1	0	0	0	0	0	0	0	0	0	0	2
TSC22D3	0	0	0	0	0	0	1	0	0	0	0	0	0	0	0	0	0	0	1	0	0	0	0	0	0	0	0	0	2
SCML1	0	0	0	0	0	0	0	0	1	0	0	0	0	0	0	0	0	0	0	0	0	0	0	1	0	0	0	0	2
TRABD2A	0	0	0	0	0	0	0	0	1	0	0	0	0	0	0	0	0	0	0	0	0	0	0	1	0	0	0	0	2
ARMH1	0	0	0	0	0	0	0	0	1	0	0	0	0	0	0	0	0	0	0	0	0	0	0	1	0	0	0	0	2
FAAH2	0	0	0	0	0	0	0	0	1	0	0	0	0	0	0	0	0	0	0	0	0	0	0	1	0	0	0	0	2
CMSS1	0	0	0	0	0	0	0	0	1	0	0	0	0	0	0	0	0	0	0	0	0	0	0	1	0	0	0	0	2
NELL2	0	0	0	0	0	0	0	0	1	0	0	0	0	0	0	0	0	0	0	0	0	0	0	1	0	0	0	0	2
ZBTB10	0	0	0	0	0	0	0	0	1	0	0	0	0	0	0	0	0	0	0	0	0	0	0	1	0	0	0	0	2
ICAM2	0	0	0	0	0	0	0	0	1	0	0	0	0	0	0	0	0	0	0	0	0	0	0	1	0	0	0	0	2
GPCPD1	0	0	0	0	0	0	0	0	1	0	0	0	0	0	0	0	0	0	0	0	0	0	0	1	0	0	0	0	2
SATB1	0	0	0	0	0	0	0	0	1	0	0	0	0	0	0	0	0	0	0	0	0	0	0	1	0	0	0	0	2
YBX3	0	0	0	0	0	0	0	0	1	0	0	0	0	0	0	0	0	1	0	0	0	0	0	0	0	0	0	0	2
TAF4B	0	0	0	0	0	0	0	0	1	0	0	0	0	0	0	0	0	0	0	0	0	0	0	1	0	0	0	0	2
TXK	0	0	0	0	0	0	0	0	1	0	0	0	0	0	0	0	0	0	0	0	0	0	0	1	0	0	0	0	2
RASA3	0	0	0	0	0	0	0	0	1	0	0	0	0	0	0	0	0	0	1	0	0	0	0	0	0	0	0	0	2
FOXP1	0	0	0	0	0	0	0	0	1	0	0	0	0	0	0	0	0	0	0	0	0	0	0	1	0	0	0	0	2
ABLIM1	0	0	0	0	0	0	0	0	1	0	0	0	0	0	0	0	0	0	0	0	0	0	0	1	0	0	0	0	2
ANKRD12	0	0	0	0	0	0	0	0	1	0	0	0	0	0	0	0	0	0	0	0	0	0	0	1	0	0	0	0	2
ALG13	0	0	0	0	0	0	0	0	1	0	0	0	0	0	0	0	0	0	0	0	0	0	0	1	0	0	0	0	2
FCMR	0	0	0	0	0	0	0	0	1	0	0	0	0	0	0	0	0	0	0	0	0	0	0	1	0	0	0	0	2
LITAF	0	0	0	0	0	0	0	0	1	0	0	0	0	0	0	0	0	0	1	0	0	0	0	0	0	0	0	0	2
NSG1	0	0	0	0	0	0	0	0	1	0	0	0	0	0	0	0	0	0	0	0	0	1	0	0	0	0	0	0	2
RIPOR2	0	0	0	0	0	0	0	0	1	0	0	0	0	0	0	0	0	0	0	0	0	0	0	1	0	0	0	0	2
ITGA6	0	0	0	0	0	0	0	0	1	0	0	0	0	0	0	0	0	0	0	0	0	0	0	1	0	0	0	0	2
SERINC5	0	0	0	0	0	0	0	0	1	0	0	0	0	0	0	0	0	0	0	0	0	0	0	1	0	0	0	0	2
FXYD7	0	0	0	0	0	0	0	0	1	0	0	0	0	0	0	0	0	0	0	0	0	0	0	1	0	0	0	0	2
CD28	0	0	0	0	0	0	0	0	1	0	0	0	0	0	0	0	0	0	0	0	0	0	0	1	0	0	0	0	2
SPC25	0	0	0	1	0	0	0	0	0	1	0	0	0	0	0	0	0	0	0	0	0	0	0	0	0	0	0	0	2
CDCA5	0	0	0	0	0	0	0	0	0	1	0	0	0	0	0	0	0	0	0	0	0	0	0	0	0	0	1	0	2
RRM2	0	0	0	1	0	0	0	0	0	1	0	0	0	0	0	0	0	0	0	0	0	0	0	0	0	0	0	0	2
BIRC5	0	0	0	0	0	0	0	0	0	1	0	0	0	0	0	0	0	0	0	0	0	0	0	0	0	0	1	0	2
CENPW	0	0	0	0	0	0	0	0	0	1	0	0	0	0	0	0	0	0	0	0	0	0	0	0	0	0	1	0	2
GINS2	0	0	0	1	0	0	0	0	0	1	0	0	0	0	0	0	0	0	0	0	0	0	0	0	0	0	0	0	2
PKMYT1	0	0	0	0	0	0	0	0	0	1	0	0	0	0	0	0	0	0	0	0	0	0	0	0	0	0	1	0	2
KIAA0101	0	0	0	1	0	0	0	0	0	1	0	0	0	0	0	0	0	0	0	0	0	0	0	0	0	0	0	0	2
ASF1B	0	0	0	0	0	0	0	0	0	1	0	0	0	0	0	0	0	0	0	0	0	0	0	0	0	0	1	0	2
CDC20	0	0	0	0	0	0	0	0	0	1	0	0	0	0	0	0	0	0	0	0	0	0	0	0	0	0	1	0	2
KIFC1	0	0	0	0	0	0	0	0	0	1	0	0	0	0	0	0	0	0	0	0	0	0	0	0	0	0	1	0	2
CKAP2L	0	0	0	0	0	0	0	0	0	1	0	0	0	0	0	0	0	0	0	0	0	0	0	0	0	0	1	0	2
CLSPN	0	0	0	1	0	0	0	0	0	1	0	0	0	0	0	0	0	0	0	0	0	0	0	0	0	0	0	0	2
CENPU	0	0	0	0	0	0	0	0	0	1	0	0	0	0	0	0	0	0	0	0	0	0	0	0	0	0	1	0	2
TUBA1B	0	0	0	1	0	0	0	0	0	0	0	0	0	0	0	0	0	0	0	0	0	0	0	0	0	0	1	0	2
STMN1	0	0	0	1	0	0	0	0	0	0	0	0	0	0	0	0	0	0	0	0	0	0	0	0	0	0	1	0	2
HIST1H4C	0	0	0	1	0	0	0	0	0	0	0	0	0	0	0	0	0	0	0	0	0	0	0	0	0	0	1	0	2
TUBB	0	0	0	1	0	0	0	0	0	0	0	0	0	0	0	0	0	0	0	0	0	0	0	0	0	0	1	0	2
HMMR	0	0	0	1	0	0	0	0	0	0	0	0	0	0	0	0	0	0	0	0	1	0	0	0	0	0	0	0	2
EGR1	0	0	0	1	0	0	0	0	0	0	0	0	0	0	0	0	1	0	0	0	0	0	0	0	0	0	0	0	2
TPX2	0	0	0	1	0	0	0	0	0	0	0	0	0	0	0	0	0	0	0	0	0	0	0	0	0	0	1	0	2
CD38	0	0	0	1	0	0	0	0	0	0	0	0	0	0	0	0	0	0	0	0	0	0	0	0	0	0	1	0	2
NUSAP1	0	0	0	1	0	0	0	0	0	0	0	0	0	0	0	0	0	0	0	0	0	0	0	0	0	0	1	0	2
PCNA	0	0	0	1	0	0	0	0	0	0	0	0	0	0	0	0	0	0	0	0	0	0	0	0	0	0	1	0	2
CKS1B	0	0	0	1	0	0	0	0	0	0	0	0	0	0	0	0	0	0	0	0	0	0	0	0	0	0	1	0	2
CDKN3	0	0	0	1	0	0	0	0	0	0	0	0	0	0	0	0	0	0	0	0	0	0	0	0	0	0	1	0	2
ITGA5	0	0	0	0	0	0	0	0	0	0	0	0	0	0	0	0	1	0	0	0	0	1	0	0	0	0	0	0	2
TGFBR3	0	0	0	0	0	0	0	0	0	0	0	0	0	0	0	0	1	0	0	0	0	1	0	0	0	0	0	0	2
GZMK	0	0	0	0	0	0	0	0	0	0	0	0	0	0	0	0	0	1	1	0	0	0	0	0	0	0	0	0	2
YPEL5	0	0	0	0	0	0	0	0	0	0	0	0	0	0	0	0	0	1	0	0	0	0	0	1	0	0	0	0	2
LYAR	0	0	0	0	0	0	0	0	0	0	0	0	0	0	0	0	0	0	1	0	0	1	0	0	0	0	0	0	2
PXN	0	0	0	0	0	0	0	0	0	0	0	0	0	0	0	0	0	0	1	0	0	1	0	0	0	0	0	0	2
CD27	0	0	0	0	0	0	0	0	0	0	0	0	0	0	0	0	0	0	0	0	0	0	0	0	0	0	1	1	2
ACTB	0	0	0	0	0	0	0	0	0	0	0	0	0	0	0	0	0	0	0	0	0	0	0	0	0	0	1	1	2
MAGED1	0	0	0	0	0	0	0	0	0	0	0	0	0	0	0	0	0	0	0	1	0	0	0	0	1	0	0	0	2
TOX	0	0	0	0	0	0	0	0	0	0	0	0	0	0	0	0	0	0	0	0	1	0	0	0	0	0	1	0	2
MYO1E	0	0	0	0	0	0	0	0	0	0	0	0	0	0	0	0	0	0	0	0	1	0	0	0	0	0	1	0	2
TSHZ2	0	0	0	0	0	0	0	0	0	0	0	0	0	0	0	0	0	0	0	0	0	0	0	1	0	0	1	0	2
CCR8	0	0	0	0	0	0	0	0	0	0	0	1	0	0	0	0	0	0	0	0	0	0	0	0	0	0	0	0	1
TNFRSF9	0	0	0	0	0	0	0	0	0	0	0	1	0	0	0	0	0	0	0	0	0	0	0	0	0	0	0	0	1
APOBEC3C	0	0	0	0	0	0	0	0	0	0	0	1	0	0	0	0	0	0	0	0	0	0	0	0	0	0	0	0	1
IFI6	0	0	0	0	0	0	0	0	0	0	0	1	0	0	0	0	0	0	0	0	0	0	0	0	0	0	0	0	1
TPI1	0	0	0	0	0	0	0	0	0	0	0	1	0	0	0	0	0	0	0	0	0	0	0	0	0	0	0	0	1
CD82	0	0	0	0	0	0	0	0	0	0	0	1	0	0	0	0	0	0	0	0	0	0	0	0	0	0	0	0	1
CST7	0	0	0	0	0	0	0	0	0	0	0	1	0	0	0	0	0	0	0	0	0	0	0	0	0	0	0	0	1
BST2	0	0	0	0	0	0	0	0	0	0	0	1	0	0	0	0	0	0	0	0	0	0	0	0	0	0	0	0	1
FKBP1A	0	0	0	0	0	0	0	0	0	0	0	1	0	0	0	0	0	0	0	0	0	0	0	0	0	0	0	0	1
RHOC	0	0	0	0	0	0	0	0	0	0	0	1	0	0	0	0	0	0	0	0	0	0	0	0	0	0	0	0	1
DUSP4	0	0	0	0	0	0	0	0	0	0	0	1	0	0	0	0	0	0	0	0	0	0	0	0	0	0	0	0	1
LAYN	0	0	0	0	0	0	0	0	0	0	0	1	0	0	0	0	0	0	0	0	0	0	0	0	0	0	0	0	1
COX5A	0	0	0	0	0	0	0	0	0	0	0	1	0	0	0	0	0	0	0	0	0	0	0	0	0	0	0	0	1
CCND2	0	0	0	0	0	0	0	0	0	0	0	1	0	0	0	0	0	0	0	0	0	0	0	0	0	0	0	0	1
MAGEH1	0	0	0	0	0	0	0	0	0	0	0	1	0	0	0	0	0	0	0	0	0	0	0	0	0	0	0	0	1
COMMD3	0	0	0	0	0	0	0	0	0	0	0	1	0	0	0	0	0	0	0	0	0	0	0	0	0	0	0	0	1
GALM	0	0	0	0	0	0	0	0	0	0	0	1	0	0	0	0	0	0	0	0	0	0	0	0	0	0	0	0	1
SDC4	0	0	0	0	0	0	0	0	0	0	0	1	0	0	0	0	0	0	0	0	0	0	0	0	0	0	0	0	1
MIR497HG	0	0	0	0	0	0	0	0	0	0	0	1	0	0	0	0	0	0	0	0	0	0	0	0	0	0	0	0	1
TYMP	0	0	0	0	0	0	0	0	0	0	0	1	0	0	0	0	0	0	0	0	0	0	0	0	0	0	0	0	1
FOXP3	0	0	0	0	0	0	0	0	0	0	0	1	0	0	0	0	0	0	0	0	0	0	0	0	0	0	0	0	1
SH2D2A	0	0	0	0	0	0	0	0	0	0	0	1	0	0	0	0	0	0	0	0	0	0	0	0	0	0	0	0	1
PKM	0	0	0	0	0	0	0	0	0	0	0	1	0	0	0	0	0	0	0	0	0	0	0	0	0	0	0	0	1
IFI35	0	0	0	0	0	0	0	0	0	0	0	1	0	0	0	0	0	0	0	0	0	0	0	0	0	0	0	0	1
PHTF2	0	0	0	0	0	0	0	0	0	0	0	1	0	0	0	0	0	0	0	0	0	0	0	0	0	0	0	0	1
IL2RA	0	0	0	0	0	0	0	0	0	0	0	1	0	0	0	0	0	0	0	0	0	0	0	0	0	0	0	0	1
STAT3	0	0	0	0	0	0	0	0	0	0	0	1	0	0	0	0	0	0	0	0	0	0	0	0	0	0	0	0	1
IL2RB	0	0	0	0	0	0	0	0	0	0	0	1	0	0	0	0	0	0	0	0	0	0	0	0	0	0	0	0	1
VDR	0	0	0	0	0	0	0	0	0	0	0	1	0	0	0	0	0	0	0	0	0	0	0	0	0	0	0	0	1
VCP	0	0	0	0	0	0	0	0	0	0	0	1	0	0	0	0	0	0	0	0	0	0	0	0	0	0	0	0	1
EBI3	0	0	0	0	0	0	0	0	0	0	0	1	0	0	0	0	0	0	0	0	0	0	0	0	0	0	0	0	1
PTPN7	0	0	0	0	0	0	0	0	0	0	0	1	0	0	0	0	0	0	0	0	0	0	0	0	0	0	0	0	1
GLRX	0	0	0	0	0	0	0	0	0	0	0	1	0	0	0	0	0	0	0	0	0	0	0	0	0	0	0	0	1
BCL2L1	0	0	0	0	0	0	0	0	0	0	0	1	0	0	0	0	0	0	0	0	0	0	0	0	0	0	0	0	1
MX1	0	0	0	0	0	0	0	0	0	0	0	1	0	0	0	0	0	0	0	0	0	0	0	0	0	0	0	0	1
PRDX3	0	0	0	0	0	0	0	0	0	0	0	1	0	0	0	0	0	0	0	0	0	0	0	0	0	0	0	0	1
ACP5	0	0	0	0	0	0	0	0	0	0	0	1	0	0	0	0	0	0	0	0	0	0	0	0	0	0	0	0	1
SIRPG	0	0	0	0	0	0	0	0	0	0	0	1	0	0	0	0	0	0	0	0	0	0	0	0	0	0	0	0	1
SCO2	0	0	0	0	0	0	0	0	0	0	0	1	0	0	0	0	0	0	0	0	0	0	0	0	0	0	0	0	1
PSMB6	0	0	0	0	0	0	0	0	0	0	0	1	0	0	0	0	0	0	0	0	0	0	0	0	0	0	0	0	1
CD79B	0	0	0	0	0	0	0	0	0	0	0	1	0	0	0	0	0	0	0	0	0	0	0	0	0	0	0	0	1
ISG15	0	0	0	0	0	0	0	0	0	0	0	1	0	0	0	0	0	0	0	0	0	0	0	0	0	0	0	0	1
MRPS6	0	0	0	0	0	0	0	0	0	0	0	1	0	0	0	0	0	0	0	0	0	0	0	0	0	0	0	0	1
RHOG	0	0	0	0	0	0	0	0	0	0	0	1	0	0	0	0	0	0	0	0	0	0	0	0	0	0	0	0	1
SAT1	0	0	0	0	0	0	0	0	0	0	0	1	0	0	0	0	0	0	0	0	0	0	0	0	0	0	0	0	1
TFRC	0	0	0	0	0	0	0	0	0	0	0	1	0	0	0	0	0	0	0	0	0	0	0	0	0	0	0	0	1
PHLDA1	0	0	0	0	0	0	0	0	0	0	0	1	0	0	0	0	0	0	0	0	0	0	0	0	0	0	0	0	1
PRDX5	0	0	0	0	0	0	0	0	0	0	0	1	0	0	0	0	0	0	0	0	0	0	0	0	0	0	0	0	1
UBE2L6	0	0	0	0	0	0	0	0	0	0	0	1	0	0	0	0	0	0	0	0	0	0	0	0	0	0	0	0	1
LAIR2	0	0	0	0	0	0	0	0	0	0	0	1	0	0	0	0	0	0	0	0	0	0	0	0	0	0	0	0	1
IL21R	0	0	0	0	0	0	0	0	0	0	0	1	0	0	0	0	0	0	0	0	0	0	0	0	0	0	0	0	1
CISH	0	0	0	0	0	0	0	0	0	0	0	1	0	0	0	0	0	0	0	0	0	0	0	0	0	0	0	0	1
NAMPT	0	0	0	0	0	0	0	0	0	0	0	1	0	0	0	0	0	0	0	0	0	0	0	0	0	0	0	0	1
EPSTI1	0	0	0	0	0	0	0	0	0	0	0	1	0	0	0	0	0	0	0	0	0	0	0	0	0	0	0	0	1
CD177	0	0	0	0	0	0	0	0	0	0	0	1	0	0	0	0	0	0	0	0	0	0	0	0	0	0	0	0	1
CD7	0	0	0	0	0	0	0	0	0	0	0	1	0	0	0	0	0	0	0	0	0	0	0	0	0	0	0	0	1
LAP3	0	0	0	0	0	0	0	0	0	0	0	1	0	0	0	0	0	0	0	0	0	0	0	0	0	0	0	0	1
HADHB	0	0	0	0	0	0	0	0	0	0	0	1	0	0	0	0	0	0	0	0	0	0	0	0	0	0	0	0	1
HLA-DRB5	0	0	0	0	0	0	0	0	0	0	0	1	0	0	0	0	0	0	0	0	0	0	0	0	0	0	0	0	1
PSMB3	0	0	0	0	0	0	0	0	0	0	0	1	0	0	0	0	0	0	0	0	0	0	0	0	0	0	0	0	1
CD58	0	0	0	0	0	0	0	0	0	0	0	1	0	0	0	0	0	0	0	0	0	0	0	0	0	0	0	0	1
LGALS1	0	0	0	0	0	0	0	0	0	0	0	1	0	0	0	0	0	0	0	0	0	0	0	0	0	0	0	0	1
C7orf25	0	0	0	0	0	0	0	0	0	0	0	1	0	0	0	0	0	0	0	0	0	0	0	0	0	0	0	0	1
IL1R1	0	0	0	0	0	0	0	0	0	0	0	1	0	0	0	0	0	0	0	0	0	0	0	0	0	0	0	0	1
ILF2	0	0	0	0	0	0	0	0	0	0	0	1	0	0	0	0	0	0	0	0	0	0	0	0	0	0	0	0	1
C20orf24	0	0	0	0	0	0	0	0	0	0	0	1	0	0	0	0	0	0	0	0	0	0	0	0	0	0	0	0	1
GADD45A	0	0	0	0	0	0	0	0	0	0	0	1	0	0	0	0	0	0	0	0	0	0	0	0	0	0	0	0	1
SLC3A2	0	0	0	0	0	0	0	0	0	0	0	1	0	0	0	0	0	0	0	0	0	0	0	0	0	0	0	0	1
HLA-DRB6	0	0	0	0	0	0	0	0	0	0	0	1	0	0	0	0	0	0	0	0	0	0	0	0	0	0	0	0	1
NUDT5	0	0	0	0	0	0	0	0	0	0	0	1	0	0	0	0	0	0	0	0	0	0	0	0	0	0	0	0	1
MIR4761	0	0	0	0	0	0	0	0	0	0	0	1	0	0	0	0	0	0	0	0	0	0	0	0	0	0	0	0	1
DYNLL1	0	0	0	0	0	0	0	0	0	0	0	1	0	0	0	0	0	0	0	0	0	0	0	0	0	0	0	0	1
HLA-DPA1	0	0	0	0	0	0	0	0	0	0	0	1	0	0	0	0	0	0	0	0	0	0	0	0	0	0	0	0	1
IFI27L2	0	0	0	0	0	0	0	0	0	0	0	1	0	0	0	0	0	0	0	0	0	0	0	0	0	0	0	0	1
COMMD3-BMI1	0	0	0	0	0	0	0	0	0	0	0	1	0	0	0	0	0	0	0	0	0	0	0	0	0	0	0	0	1
TGIF2-C20orf24	0	0	0	0	0	0	0	0	0	0	0	1	0	0	0	0	0	0	0	0	0	0	0	0	0	0	0	0	1
STAT1	0	0	0	0	0	0	0	0	0	0	0	1	0	0	0	0	0	0	0	0	0	0	0	0	0	0	0	0	1
FKBP1A-SDCBP2	0	0	0	0	0	0	0	0	0	0	0	1	0	0	0	0	0	0	0	0	0	0	0	0	0	0	0	0	1
SAMSN1	0	0	0	0	0	0	0	0	0	0	0	1	0	0	0	0	0	0	0	0	0	0	0	0	0	0	0	0	1
MIR4632	0	0	0	0	0	0	0	0	0	0	0	1	0	0	0	0	0	0	0	0	0	0	0	0	0	0	0	0	1
NEDD9	0	0	0	0	0	0	0	0	0	0	0	1	0	0	0	0	0	0	0	0	0	0	0	0	0	0	0	0	1
LAPTM4B	0	0	0	0	0	0	0	0	0	0	0	1	0	0	0	0	0	0	0	0	0	0	0	0	0	0	0	0	1
PSMA2	0	0	0	0	0	0	0	0	0	0	0	1	0	0	0	0	0	0	0	0	0	0	0	0	0	0	0	0	1
SYNGR2	0	0	0	0	0	0	0	0	0	0	0	1	0	0	0	0	0	0	0	0	0	0	0	0	0	0	0	0	1
SLC25A5	0	0	0	0	0	0	0	0	0	0	0	1	0	0	0	0	0	0	0	0	0	0	0	0	0	0	0	0	1
IL21R-AS1	0	0	0	0	0	0	0	0	0	0	0	1	0	0	0	0	0	0	0	0	0	0	0	0	0	0	0	0	1
OAS1	0	0	0	0	0	0	0	0	0	0	0	1	0	0	0	0	0	0	0	0	0	0	0	0	0	0	0	0	1
PTPRJ	0	0	0	0	0	0	0	0	0	0	0	1	0	0	0	0	0	0	0	0	0	0	0	0	0	0	0	0	1
CRADD	0	0	0	0	0	0	0	0	0	0	0	1	0	0	0	0	0	0	0	0	0	0	0	0	0	0	0	0	1
CYCS	0	0	0	0	0	0	0	0	0	0	0	1	0	0	0	0	0	0	0	0	0	0	0	0	0	0	0	0	1
MRPL51	0	0	0	0	0	0	0	0	0	0	0	1	0	0	0	0	0	0	0	0	0	0	0	0	0	0	0	0	1
PPP1CB	0	0	0	0	0	0	0	0	0	0	0	1	0	0	0	0	0	0	0	0	0	0	0	0	0	0	0	0	1
MZB1	0	0	0	0	0	0	0	0	0	0	0	1	0	0	0	0	0	0	0	0	0	0	0	0	0	0	0	0	1
EFHD2	0	0	0	0	0	0	0	0	0	0	0	1	0	0	0	0	0	0	0	0	0	0	0	0	0	0	0	0	1
ARPP19	0	0	0	0	0	0	0	0	0	0	0	1	0	0	0	0	0	0	0	0	0	0	0	0	0	0	0	0	1
PPA1	0	0	0	0	0	0	0	0	0	0	0	1	0	0	0	0	0	0	0	0	0	0	0	0	0	0	0	0	1
MIR4435-2HG	0	0	0	0	0	0	0	0	0	0	0	1	0	0	0	0	0	0	0	0	0	0	0	0	0	0	0	0	1
HN1	0	0	0	0	0	0	0	0	0	0	0	1	0	0	0	0	0	0	0	0	0	0	0	0	0	0	0	0	1
LYST	0	0	0	0	0	0	0	0	0	0	0	1	0	0	0	0	0	0	0	0	0	0	0	0	0	0	0	0	1
PDIA6	0	0	0	0	0	0	0	0	0	0	0	1	0	0	0	0	0	0	0	0	0	0	0	0	0	0	0	0	1
NOP10	0	0	0	0	0	0	0	0	0	0	0	1	0	0	0	0	0	0	0	0	0	0	0	0	0	0	0	0	1
NRBP1	0	0	0	0	0	0	0	0	0	0	0	1	0	0	0	0	0	0	0	0	0	0	0	0	0	0	0	0	1
C3AR1	0	0	0	0	0	0	0	0	0	0	0	1	0	0	0	0	0	0	0	0	0	0	0	0	0	0	0	0	1
ANKRD10	0	0	0	0	0	0	0	0	0	0	0	1	0	0	0	0	0	0	0	0	0	0	0	0	0	0	0	0	1
GNG2	0	0	0	0	0	0	0	0	0	0	0	1	0	0	0	0	0	0	0	0	0	0	0	0	0	0	0	0	1
SQRDL	0	0	0	0	0	0	0	0	0	0	0	1	0	0	0	0	0	0	0	0	0	0	0	0	0	0	0	0	1
ZBTB32	0	0	0	0	0	0	0	0	0	0	0	1	0	0	0	0	0	0	0	0	0	0	0	0	0	0	0	0	1
CHMP2A	0	0	0	0	0	0	0	0	0	0	0	1	0	0	0	0	0	0	0	0	0	0	0	0	0	0	0	0	1
GATA3	0	0	0	0	0	0	0	0	0	0	0	1	0	0	0	0	0	0	0	0	0	0	0	0	0	0	0	0	1
ASB2	0	0	0	0	0	0	0	0	0	0	0	1	0	0	0	0	0	0	0	0	0	0	0	0	0	0	0	0	1
CASP1	0	0	0	0	0	0	0	0	0	0	0	1	0	0	0	0	0	0	0	0	0	0	0	0	0	0	0	0	1
SLC35F2	0	0	0	0	0	0	0	0	0	0	0	1	0	0	0	0	0	0	0	0	0	0	0	0	0	0	0	0	1
HLA-DRB1	0	0	0	0	0	0	0	0	0	0	0	1	0	0	0	0	0	0	0	0	0	0	0	0	0	0	0	0	1
CDKN1A	0	0	0	0	0	0	0	0	0	0	0	1	0	0	0	0	0	0	0	0	0	0	0	0	0	0	0	0	1
IL4R	0	0	0	0	0	0	0	0	0	0	0	1	0	0	0	0	0	0	0	0	0	0	0	0	0	0	0	0	1
PTPN22	0	0	0	0	0	0	0	0	0	0	0	1	0	0	0	0	0	0	0	0	0	0	0	0	0	0	0	0	1
WSB1	0	0	0	0	0	0	0	0	0	0	0	1	0	0	0	0	0	0	0	0	0	0	0	0	0	0	0	0	1
IL12RB1	0	0	0	0	0	0	0	0	0	0	0	1	0	0	0	0	0	0	0	0	0	0	0	0	0	0	0	0	1
ETV7	0	0	0	0	0	0	0	0	0	0	0	1	0	0	0	0	0	0	0	0	0	0	0	0	0	0	0	0	1
PSME2	0	0	0	0	0	0	0	0	0	0	0	1	0	0	0	0	0	0	0	0	0	0	0	0	0	0	0	0	1
GBP2	0	0	0	0	0	0	0	0	0	0	0	1	0	0	0	0	0	0	0	0	0	0	0	0	0	0	0	0	1
SURF4	0	0	0	0	0	0	0	0	0	0	0	1	0	0	0	0	0	0	0	0	0	0	0	0	0	0	0	0	1
CCT3	0	0	0	0	0	0	0	0	0	0	0	1	0	0	0	0	0	0	0	0	0	0	0	0	0	0	0	0	1
SAMD9L	0	0	0	0	0	0	0	0	0	0	0	1	0	0	0	0	0	0	0	0	0	0	0	0	0	0	0	0	1
SH3BGRL	0	0	0	0	0	0	0	0	0	0	0	1	0	0	0	0	0	0	0	0	0	0	0	0	0	0	0	0	1
MIR3656	0	0	0	0	0	0	0	0	0	0	0	1	0	0	0	0	0	0	0	0	0	0	0	0	0	0	0	0	1
RHBDD2	0	0	0	0	0	0	0	0	0	0	0	1	0	0	0	0	0	0	0	0	0	0	0	0	0	0	0	0	1
RANBP1	0	0	0	0	0	0	0	0	0	0	0	1	0	0	0	0	0	0	0	0	0	0	0	0	0	0	0	0	1
CMTM6	0	0	0	0	0	0	0	0	0	0	0	1	0	0	0	0	0	0	0	0	0	0	0	0	0	0	0	0	1
GCNT1	0	0	0	0	0	0	0	0	0	0	0	1	0	0	0	0	0	0	0	0	0	0	0	0	0	0	0	0	1
IL12RB2	0	0	0	0	0	0	0	0	0	0	0	1	0	0	0	0	0	0	0	0	0	0	0	0	0	0	0	0	1
SLC16A1	0	0	0	0	0	0	0	0	0	0	0	1	0	0	0	0	0	0	0	0	0	0	0	0	0	0	0	0	1
PSMA4	0	0	0	0	0	0	0	0	0	0	0	1	0	0	0	0	0	0	0	0	0	0	0	0	0	0	0	0	1
ATP6V1C2	0	0	0	0	0	0	0	0	0	0	0	1	0	0	0	0	0	0	0	0	0	0	0	0	0	0	0	0	1
COMT	0	0	0	0	0	0	0	0	0	0	0	1	0	0	0	0	0	0	0	0	0	0	0	0	0	0	0	0	1
PSMA5	0	0	0	0	0	0	0	0	0	0	0	1	0	0	0	0	0	0	0	0	0	0	0	0	0	0	0	0	1
TMX1	0	0	0	0	0	0	0	0	0	0	0	1	0	0	0	0	0	0	0	0	0	0	0	0	0	0	0	0	1
PHPT1	0	0	0	0	0	0	0	0	0	0	0	1	0	0	0	0	0	0	0	0	0	0	0	0	0	0	0	0	1
ADRM1	0	0	0	0	0	0	0	0	0	0	0	1	0	0	0	0	0	0	0	0	0	0	0	0	0	0	0	0	1
FAM104A	0	0	0	0	0	0	0	0	0	0	0	1	0	0	0	0	0	0	0	0	0	0	0	0	0	0	0	0	1
SEC14L1	0	0	0	0	0	0	0	0	0	0	0	1	0	0	0	0	0	0	0	0	0	0	0	0	0	0	0	0	1
ATP5G3	0	0	0	0	0	0	0	0	0	0	0	1	0	0	0	0	0	0	0	0	0	0	0	0	0	0	0	0	1
SEC11C	0	0	0	0	0	0	0	0	0	0	0	1	0	0	0	0	0	0	0	0	0	0	0	0	0	0	0	0	1
MIR1204	0	0	0	0	0	0	0	0	0	0	0	1	0	0	0	0	0	0	0	0	0	0	0	0	0	0	0	0	1
HTATIP2	0	0	0	0	0	0	0	0	0	0	0	1	0	0	0	0	0	0	0	0	0	0	0	0	0	0	0	0	1
KCNN4	0	0	0	0	0	0	0	0	0	0	0	1	0	0	0	0	0	0	0	0	0	0	0	0	0	0	0	0	1
LASP1	0	0	0	0	0	0	0	0	0	0	0	1	0	0	0	0	0	0	0	0	0	0	0	0	0	0	0	0	1
ENO1	0	0	0	0	0	0	0	0	0	0	0	1	0	0	0	0	0	0	0	0	0	0	0	0	0	0	0	0	1
CTNNB1	0	0	0	0	0	0	0	0	0	0	0	1	0	0	0	0	0	0	0	0	0	0	0	0	0	0	0	0	1
PFKP	0	0	0	0	0	0	0	0	0	0	0	1	0	0	0	0	0	0	0	0	0	0	0	0	0	0	0	0	1
GNG5	0	0	0	0	0	0	0	0	0	0	0	1	0	0	0	0	0	0	0	0	0	0	0	0	0	0	0	0	1
NDUFA6	0	0	0	0	0	0	0	0	0	0	0	1	0	0	0	0	0	0	0	0	0	0	0	0	0	0	0	0	1
PSMC3	0	0	0	0	0	0	0	0	0	0	0	1	0	0	0	0	0	0	0	0	0	0	0	0	0	0	0	0	1
LY75	0	0	0	0	0	0	0	0	0	0	0	1	0	0	0	0	0	0	0	0	0	0	0	0	0	0	0	0	1
BUD31	0	0	0	0	0	0	0	0	0	0	0	1	0	0	0	0	0	0	0	0	0	0	0	0	0	0	0	0	1
POMP	0	0	0	0	0	0	0	0	0	0	0	1	0	0	0	0	0	0	0	0	0	0	0	0	0	0	0	0	1
PPP1CA	0	0	0	0	0	0	0	0	0	0	0	1	0	0	0	0	0	0	0	0	0	0	0	0	0	0	0	0	1
C9orf16	0	0	0	0	0	0	0	0	0	0	0	1	0	0	0	0	0	0	0	0	0	0	0	0	0	0	0	0	1
VMP1	0	0	0	0	0	0	0	0	0	0	0	1	0	0	0	0	0	0	0	0	0	0	0	0	0	0	0	0	1
PSMD1	0	0	0	0	0	0	0	0	0	0	0	1	0	0	0	0	0	0	0	0	0	0	0	0	0	0	0	0	1
NAB1	0	0	0	0	0	0	0	0	0	0	0	1	0	0	0	0	0	0	0	0	0	0	0	0	0	0	0	0	1
EMC7	0	0	0	0	0	0	0	0	0	0	0	1	0	0	0	0	0	0	0	0	0	0	0	0	0	0	0	0	1
GBP5	0	0	0	0	0	0	0	0	0	0	0	1	0	0	0	0	0	0	0	0	0	0	0	0	0	0	0	0	1
PTP4A3	0	0	0	0	0	0	0	0	0	0	0	1	0	0	0	0	0	0	0	0	0	0	0	0	0	0	0	0	1
CFLAR-AS1	0	0	0	0	0	0	0	0	0	0	0	1	0	0	0	0	0	0	0	0	0	0	0	0	0	0	0	0	1
TPM4	0	0	0	0	0	0	0	0	0	0	0	1	0	0	0	0	0	0	0	0	0	0	0	0	0	0	0	0	1
PSMD8	0	0	0	0	0	0	0	0	0	0	0	1	0	0	0	0	0	0	0	0	0	0	0	0	0	0	0	0	1
GBP4	0	0	0	0	0	0	0	0	0	0	0	1	0	0	0	0	0	0	0	0	0	0	0	0	0	0	0	0	1
ARPC1B	0	0	0	0	0	0	0	0	0	0	0	1	0	0	0	0	0	0	0	0	0	0	0	0	0	0	0	0	1
PSMA7	0	0	0	0	0	0	0	0	0	0	0	1	0	0	0	0	0	0	0	0	0	0	0	0	0	0	0	0	1
LAMTOR5	0	0	0	0	0	0	0	0	0	0	0	1	0	0	0	0	0	0	0	0	0	0	0	0	0	0	0	0	1
AP2S1	0	0	0	0	0	0	0	0	0	0	0	1	0	0	0	0	0	0	0	0	0	0	0	0	0	0	0	0	1
RBBP7	0	0	0	0	0	0	0	0	0	0	0	1	0	0	0	0	0	0	0	0	0	0	0	0	0	0	0	0	1
HPRT1	0	0	0	0	0	0	0	0	0	0	0	1	0	0	0	0	0	0	0	0	0	0	0	0	0	0	0	0	1
PRDX1	0	0	0	0	0	0	0	0	0	0	0	1	0	0	0	0	0	0	0	0	0	0	0	0	0	0	0	0	1
OS9	0	0	0	0	0	0	0	0	0	0	0	1	0	0	0	0	0	0	0	0	0	0	0	0	0	0	0	0	1
CALR	0	0	0	0	0	0	0	0	0	0	0	1	0	0	0	0	0	0	0	0	0	0	0	0	0	0	0	0	1
HNRNPLL	0	0	0	0	0	0	0	0	0	0	0	1	0	0	0	0	0	0	0	0	0	0	0	0	0	0	0	0	1
CD74	0	0	0	0	0	0	0	0	0	0	0	1	0	0	0	0	0	0	0	0	0	0	0	0	0	0	0	0	1
PPM1G	0	0	0	0	0	0	0	0	0	0	0	1	0	0	0	0	0	0	0	0	0	0	0	0	0	0	0	0	1
ATOX1	0	0	0	0	0	0	0	0	0	0	0	1	0	0	0	0	0	0	0	0	0	0	0	0	0	0	0	0	1
GABARAP	0	0	0	0	0	0	0	0	0	0	0	1	0	0	0	0	0	0	0	0	0	0	0	0	0	0	0	0	1
OTUD5	0	0	0	0	0	0	0	0	0	0	0	1	0	0	0	0	0	0	0	0	0	0	0	0	0	0	0	0	1
RNASEK-C17orf49	0	0	0	0	0	0	0	0	0	0	0	1	0	0	0	0	0	0	0	0	0	0	0	0	0	0	0	0	1
ACOT9	0	0	0	0	0	0	0	0	0	0	0	1	0	0	0	0	0	0	0	0	0	0	0	0	0	0	0	0	1
SNX17	0	0	0	0	0	0	0	0	0	0	0	1	0	0	0	0	0	0	0	0	0	0	0	0	0	0	0	0	1
SPATS2L	0	0	0	0	0	0	0	0	0	0	0	1	0	0	0	0	0	0	0	0	0	0	0	0	0	0	0	0	1
DDOST	0	0	0	0	0	0	0	0	0	0	0	1	0	0	0	0	0	0	0	0	0	0	0	0	0	0	0	0	1
TRIM69	0	0	0	0	0	0	0	0	0	0	0	1	0	0	0	0	0	0	0	0	0	0	0	0	0	0	0	0	1
VAMP8	0	0	0	0	0	0	0	0	0	0	0	1	0	0	0	0	0	0	0	0	0	0	0	0	0	0	0	0	1
ATP5B	0	0	0	0	0	0	0	0	0	0	0	1	0	0	0	0	0	0	0	0	0	0	0	0	0	0	0	0	1
NINJ1	0	0	0	0	0	0	0	0	0	0	0	1	0	0	0	0	0	0	0	0	0	0	0	0	0	0	0	0	1
SUMO1	0	0	0	0	0	0	0	0	0	0	0	1	0	0	0	0	0	0	0	0	0	0	0	0	0	0	0	0	1
PRDX2	0	0	0	0	0	0	0	0	0	0	0	1	0	0	0	0	0	0	0	0	0	0	0	0	0	0	0	0	1
C15orf53	0	0	0	0	0	0	0	0	0	0	0	1	0	0	0	0	0	0	0	0	0	0	0	0	0	0	0	0	1
MAP1LC3A	0	0	0	0	0	0	0	0	0	0	0	1	0	0	0	0	0	0	0	0	0	0	0	0	0	0	0	0	1
HADHA	0	0	0	0	0	0	0	0	0	0	0	1	0	0	0	0	0	0	0	0	0	0	0	0	0	0	0	0	1
DOK2	0	0	0	0	0	0	0	0	0	0	0	1	0	0	0	0	0	0	0	0	0	0	0	0	0	0	0	0	1
TBC1D8	0	0	0	0	0	0	0	0	0	0	0	1	0	0	0	0	0	0	0	0	0	0	0	0	0	0	0	0	1
ST6GALNAC6	0	0	0	0	0	0	0	0	0	0	0	1	0	0	0	0	0	0	0	0	0	0	0	0	0	0	0	0	1
TXN2	0	0	0	0	0	0	0	0	0	0	0	1	0	0	0	0	0	0	0	0	0	0	0	0	0	0	0	0	1
ATP6V1B2	0	0	0	0	0	0	0	0	0	0	0	1	0	0	0	0	0	0	0	0	0	0	0	0	0	0	0	0	1
TMEM154	0	0	0	0	0	0	0	0	0	0	0	1	0	0	0	0	0	0	0	0	0	0	0	0	0	0	0	0	1
FANK1	0	0	0	0	0	0	0	0	0	0	0	1	0	0	0	0	0	0	0	0	0	0	0	0	0	0	0	0	1
MOB3A	0	0	0	0	0	0	0	0	0	0	0	1	0	0	0	0	0	0	0	0	0	0	0	0	0	0	0	0	1
IRF2	0	0	0	0	0	0	0	0	0	0	0	1	0	0	0	0	0	0	0	0	0	0	0	0	0	0	0	0	1
GOT2	0	0	0	0	0	0	0	0	0	0	0	1	0	0	0	0	0	0	0	0	0	0	0	0	0	0	0	0	1
SFT2D1	0	0	0	0	0	0	0	0	0	0	0	1	0	0	0	0	0	0	0	0	0	0	0	0	0	0	0	0	1
TNIP1	0	0	0	0	0	0	0	0	0	0	0	1	0	0	0	0	0	0	0	0	0	0	0	0	0	0	0	0	1
CEACAM1	0	0	0	0	0	0	0	0	0	0	0	1	0	0	0	0	0	0	0	0	0	0	0	0	0	0	0	0	1
ISOC1	0	0	0	0	0	0	0	0	0	0	0	1	0	0	0	0	0	0	0	0	0	0	0	0	0	0	0	0	1
LPXN	0	0	0	0	0	0	0	0	0	0	0	1	0	0	0	0	0	0	0	0	0	0	0	0	0	0	0	0	1
PRF1	0	0	0	0	0	0	0	0	0	0	0	1	0	0	0	0	0	0	0	0	0	0	0	0	0	0	0	0	1
TNIP3	0	0	0	0	0	0	0	0	0	0	0	1	0	0	0	0	0	0	0	0	0	0	0	0	0	0	0	0	1
NCALD	0	0	0	0	0	0	0	0	0	0	0	1	0	0	0	0	0	0	0	0	0	0	0	0	0	0	0	0	1
CMC2	0	0	0	0	0	0	0	0	0	0	0	1	0	0	0	0	0	0	0	0	0	0	0	0	0	0	0	0	1
NDUFAB1	0	0	0	0	0	0	0	0	0	0	0	1	0	0	0	0	0	0	0	0	0	0	0	0	0	0	0	0	1
COX17	0	0	0	0	0	0	0	0	0	0	0	1	0	0	0	0	0	0	0	0	0	0	0	0	0	0	0	0	1
PSMB4	0	0	0	0	0	0	0	0	0	0	0	1	0	0	0	0	0	0	0	0	0	0	0	0	0	0	0	0	1
BRE	0	0	0	0	0	0	0	0	0	0	0	1	0	0	0	0	0	0	0	0	0	0	0	0	0	0	0	0	1
PSMC2	0	0	0	0	0	0	0	0	0	0	0	1	0	0	0	0	0	0	0	0	0	0	0	0	0	0	0	0	1
APLP2	0	0	0	0	0	0	0	0	0	0	0	1	0	0	0	0	0	0	0	0	0	0	0	0	0	0	0	0	1
CD79A	0	0	0	0	0	0	0	0	0	0	0	1	0	0	0	0	0	0	0	0	0	0	0	0	0	0	0	0	1
PARK7	0	0	0	0	0	0	0	0	0	0	0	1	0	0	0	0	0	0	0	0	0	0	0	0	0	0	0	0	1
OAS3	0	0	0	0	0	0	0	0	0	0	0	1	0	0	0	0	0	0	0	0	0	0	0	0	0	0	0	0	1
GTF3C6	0	0	0	0	0	0	0	0	0	0	0	1	0	0	0	0	0	0	0	0	0	0	0	0	0	0	0	0	1
NDUFA12	0	0	0	0	0	0	0	0	0	0	0	1	0	0	0	0	0	0	0	0	0	0	0	0	0	0	0	0	1
SRA1	0	0	0	0	0	0	0	0	0	0	0	1	0	0	0	0	0	0	0	0	0	0	0	0	0	0	0	0	1
CCDC22	0	0	0	0	0	0	0	0	0	0	0	1	0	0	0	0	0	0	0	0	0	0	0	0	0	0	0	0	1
NSF	0	0	0	0	0	0	0	0	0	0	0	1	0	0	0	0	0	0	0	0	0	0	0	0	0	0	0	0	1
AP2M1	0	0	0	0	0	0	0	0	0	0	0	1	0	0	0	0	0	0	0	0	0	0	0	0	0	0	0	0	1
DYNC1I2	0	0	0	0	0	0	0	0	0	0	0	1	0	0	0	0	0	0	0	0	0	0	0	0	0	0	0	0	1
SMS	0	0	0	0	0	0	0	0	0	0	0	1	0	0	0	0	0	0	0	0	0	0	0	0	0	0	0	0	1
RAB10	0	0	0	0	0	0	0	0	0	0	0	1	0	0	0	0	0	0	0	0	0	0	0	0	0	0	0	0	1
STIP1	0	0	0	0	0	0	0	0	0	0	0	1	0	0	0	0	0	0	0	0	0	0	0	0	0	0	0	0	1
CTNNA1	0	0	0	0	0	0	0	0	0	0	0	1	0	0	0	0	0	0	0	0	0	0	0	0	0	0	0	0	1
NCOA3	0	0	0	0	0	0	0	0	0	0	0	1	0	0	0	0	0	0	0	0	0	0	0	0	0	0	0	0	1
CDIP1	0	0	0	0	0	0	0	0	0	0	0	1	0	0	0	0	0	0	0	0	0	0	0	0	0	0	0	0	1
ENTPD1-AS1	0	0	0	0	0	0	0	0	0	0	0	1	0	0	0	0	0	0	0	0	0	0	0	0	0	0	0	0	1
MIIP	0	0	0	0	0	0	0	0	0	0	0	1	0	0	0	0	0	0	0	0	0	0	0	0	0	0	0	0	1
COPS6	0	0	0	0	0	0	0	0	0	0	0	1	0	0	0	0	0	0	0	0	0	0	0	0	0	0	0	0	1
PSMD4	0	0	0	0	0	0	0	0	0	0	0	1	0	0	0	0	0	0	0	0	0	0	0	0	0	0	0	0	1
UBA1	0	0	0	0	0	0	0	0	0	0	0	1	0	0	0	0	0	0	0	0	0	0	0	0	0	0	0	0	1
IRF9	0	0	0	0	0	0	0	0	0	0	0	1	0	0	0	0	0	0	0	0	0	0	0	0	0	0	0	0	1
LAMTOR2	0	0	0	0	0	0	0	0	0	0	0	1	0	0	0	0	0	0	0	0	0	0	0	0	0	0	0	0	1
GSTO1	0	0	0	0	0	0	0	0	0	0	0	1	0	0	0	0	0	0	0	0	0	0	0	0	0	0	0	0	1
NDUFB8	0	0	0	0	0	0	0	0	0	0	0	1	0	0	0	0	0	0	0	0	0	0	0	0	0	0	0	0	1
STARD7	0	0	0	0	0	0	0	0	0	0	0	1	0	0	0	0	0	0	0	0	0	0	0	0	0	0	0	0	1
DYNLRB1	0	0	0	0	0	0	0	0	0	0	0	1	0	0	0	0	0	0	0	0	0	0	0	0	0	0	0	0	1
SLC25A3	0	0	0	0	0	0	0	0	0	0	0	1	0	0	0	0	0	0	0	0	0	0	0	0	0	0	0	0	1
LRRC61	0	0	0	0	0	0	0	0	0	0	0	1	0	0	0	0	0	0	0	0	0	0	0	0	0	0	0	0	1
ITFG1	0	0	0	0	0	0	0	0	0	0	0	1	0	0	0	0	0	0	0	0	0	0	0	0	0	0	0	0	1
COX7A2L	0	0	0	0	0	0	0	0	0	0	0	1	0	0	0	0	0	0	0	0	0	0	0	0	0	0	0	0	1
MAN1A2	0	0	0	0	0	0	0	0	0	0	0	1	0	0	0	0	0	0	0	0	0	0	0	0	0	0	0	0	1
SEC61A2	0	0	0	0	0	0	0	0	0	0	0	1	0	0	0	0	0	0	0	0	0	0	0	0	0	0	0	0	1
FANCL	0	0	0	0	0	0	0	0	0	0	0	1	0	0	0	0	0	0	0	0	0	0	0	0	0	0	0	0	1
LY75-CD302	0	0	0	0	0	0	0	0	0	0	0	1	0	0	0	0	0	0	0	0	0	0	0	0	0	0	0	0	1
TIMM17A	0	0	0	0	0	0	0	0	0	0	0	1	0	0	0	0	0	0	0	0	0	0	0	0	0	0	0	0	1
C14orf166	0	0	0	0	0	0	0	0	0	0	0	1	0	0	0	0	0	0	0	0	0	0	0	0	0	0	0	0	1
CD80	0	0	0	0	0	0	0	0	0	0	0	1	0	0	0	0	0	0	0	0	0	0	0	0	0	0	0	0	1
TAGLN2	0	0	0	0	0	0	0	0	0	0	0	1	0	0	0	0	0	0	0	0	0	0	0	0	0	0	0	0	1
PMAIP1	0	0	0	0	0	0	0	0	0	0	0	1	0	0	0	0	0	0	0	0	0	0	0	0	0	0	0	0	1
BTG3	0	0	0	0	0	0	0	0	0	0	0	1	0	0	0	0	0	0	0	0	0	0	0	0	0	0	0	0	1
ARL6IP1	0	0	0	0	0	0	0	0	0	0	0	1	0	0	0	0	0	0	0	0	0	0	0	0	0	0	0	0	1
HM13	0	0	0	0	0	0	0	0	0	0	0	1	0	0	0	0	0	0	0	0	0	0	0	0	0	0	0	0	1
CREB3L2	0	0	0	0	0	0	0	0	0	0	0	1	0	0	0	0	0	0	0	0	0	0	0	0	0	0	0	0	1
IKZF4	0	0	0	0	0	0	0	0	0	0	0	1	0	0	0	0	0	0	0	0	0	0	0	0	0	0	0	0	1
ARPC1A	0	0	0	0	0	0	0	0	0	0	0	1	0	0	0	0	0	0	0	0	0	0	0	0	0	0	0	0	1
IRF5	0	0	0	0	0	0	0	0	0	0	0	1	0	0	0	0	0	0	0	0	0	0	0	0	0	0	0	0	1
ROMO1	0	0	0	0	0	0	0	0	0	0	0	1	0	0	0	0	0	0	0	0	0	0	0	0	0	0	0	0	1
ELOF1	0	0	0	0	0	0	0	0	0	0	0	1	0	0	0	0	0	0	0	0	0	0	0	0	0	0	0	0	1
SLC5A3	0	0	0	0	0	0	0	0	0	0	0	1	0	0	0	0	0	0	0	0	0	0	0	0	0	0	0	0	1
RAB5C	0	0	0	0	0	0	0	0	0	0	0	1	0	0	0	0	0	0	0	0	0	0	0	0	0	0	0	0	1
RPS27L	0	0	0	0	0	0	0	0	0	0	0	1	0	0	0	0	0	0	0	0	0	0	0	0	0	0	0	0	1
NAGK	0	0	0	0	0	0	0	0	0	0	0	1	0	0	0	0	0	0	0	0	0	0	0	0	0	0	0	0	1
RNF181	0	0	0	0	0	0	0	0	0	0	0	1	0	0	0	0	0	0	0	0	0	0	0	0	0	0	0	0	1
TRMT112	0	0	0	0	0	0	0	0	0	0	0	1	0	0	0	0	0	0	0	0	0	0	0	0	0	0	0	0	1
COX7B	0	0	0	0	0	0	0	0	0	0	0	1	0	0	0	0	0	0	0	0	0	0	0	0	0	0	0	0	1
TLK1	0	0	0	0	0	0	0	0	0	0	0	1	0	0	0	0	0	0	0	0	0	0	0	0	0	0	0	0	1
UBE2N	0	0	0	0	0	0	0	0	0	0	0	1	0	0	0	0	0	0	0	0	0	0	0	0	0	0	0	0	1
HSPA1L	0	0	0	0	0	0	0	0	0	0	0	1	0	0	0	0	0	0	0	0	0	0	0	0	0	0	0	0	1
CADM1	0	0	0	0	0	0	0	0	0	0	0	1	0	0	0	0	0	0	0	0	0	0	0	0	0	0	0	0	1
BRE-AS1	0	0	0	0	0	0	0	0	0	0	0	1	0	0	0	0	0	0	0	0	0	0	0	0	0	0	0	0	1
LSM10	0	0	0	0	0	0	0	0	0	0	0	1	0	0	0	0	0	0	0	0	0	0	0	0	0	0	0	0	1
C5orf45	0	0	0	0	0	0	0	0	0	0	0	1	0	0	0	0	0	0	0	0	0	0	0	0	0	0	0	0	1
NFAT5	0	0	0	0	0	0	0	0	0	0	0	1	0	0	0	0	0	0	0	0	0	0	0	0	0	0	0	0	1
NDUFB3	0	0	0	0	0	0	0	0	0	0	0	1	0	0	0	0	0	0	0	0	0	0	0	0	0	0	0	0	1
SNX9	0	0	0	0	0	0	0	0	0	0	0	1	0	0	0	0	0	0	0	0	0	0	0	0	0	0	0	0	1
NDUFS6	0	0	0	0	0	0	0	0	0	0	0	1	0	0	0	0	0	0	0	0	0	0	0	0	0	0	0	0	1
TAX1BP1	0	0	0	0	0	0	0	0	0	0	0	1	0	0	0	0	0	0	0	0	0	0	0	0	0	0	0	0	1
SNRPC	0	0	0	0	0	0	0	0	0	0	0	1	0	0	0	0	0	0	0	0	0	0	0	0	0	0	0	0	1
TXNDC17	0	0	0	0	0	0	0	0	0	0	0	1	0	0	0	0	0	0	0	0	0	0	0	0	0	0	0	0	1
TPMT	0	0	0	0	0	0	0	0	0	0	0	1	0	0	0	0	0	0	0	0	0	0	0	0	0	0	0	0	1
GRSF1	0	0	0	0	0	0	0	0	0	0	0	1	0	0	0	0	0	0	0	0	0	0	0	0	0	0	0	0	1
PMVK	0	0	0	0	0	0	0	0	0	0	0	1	0	0	0	0	0	0	0	0	0	0	0	0	0	0	0	0	1
ADORA2A	0	0	0	0	0	0	0	0	0	0	0	1	0	0	0	0	0	0	0	0	0	0	0	0	0	0	0	0	1
ZC2HC1A	0	0	0	0	0	0	0	0	0	0	0	1	0	0	0	0	0	0	0	0	0	0	0	0	0	0	0	0	1
RBX1	0	0	0	0	0	0	0	0	0	0	0	1	0	0	0	0	0	0	0	0	0	0	0	0	0	0	0	0	1
NDUFC2	0	0	0	0	0	0	0	0	0	0	0	1	0	0	0	0	0	0	0	0	0	0	0	0	0	0	0	0	1
IL27RA	0	0	0	0	0	0	0	0	0	0	0	1	0	0	0	0	0	0	0	0	0	0	0	0	0	0	0	0	1
EZR-AS1	0	0	0	0	0	0	0	0	0	0	0	1	0	0	0	0	0	0	0	0	0	0	0	0	0	0	0	0	1
FDPS	0	0	0	0	0	0	0	0	0	0	0	1	0	0	0	0	0	0	0	0	0	0	0	0	0	0	0	0	1
SQSTM1	0	0	0	0	0	0	0	0	0	0	0	1	0	0	0	0	0	0	0	0	0	0	0	0	0	0	0	0	1
DPYSL2	0	0	0	0	0	0	0	0	0	0	0	1	0	0	0	0	0	0	0	0	0	0	0	0	0	0	0	0	1
SUMO2	0	0	0	0	0	0	0	0	0	0	0	1	0	0	0	0	0	0	0	0	0	0	0	0	0	0	0	0	1
AGTRAP	0	0	0	0	0	0	0	0	0	0	0	1	0	0	0	0	0	0	0	0	0	0	0	0	0	0	0	0	1
RAD9A	0	0	0	0	0	0	0	0	0	0	0	1	0	0	0	0	0	0	0	0	0	0	0	0	0	0	0	0	1
PAIP2	0	0	0	0	0	0	0	0	0	0	0	1	0	0	0	0	0	0	0	0	0	0	0	0	0	0	0	0	1
HLA-DRA	0	0	0	0	0	0	0	0	0	0	0	1	0	0	0	0	0	0	0	0	0	0	0	0	0	0	0	0	1
SLC43A3	0	0	0	0	0	0	0	0	0	0	0	1	0	0	0	0	0	0	0	0	0	0	0	0	0	0	0	0	1
FLVCR2	0	0	0	0	0	0	0	0	0	0	0	1	0	0	0	0	0	0	0	0	0	0	0	0	0	0	0	0	1
PSMB1	0	0	0	0	0	0	0	0	0	0	0	1	0	0	0	0	0	0	0	0	0	0	0	0	0	0	0	0	1
NDUFC2-KCTD14	0	0	0	0	0	0	0	0	0	0	0	1	0	0	0	0	0	0	0	0	0	0	0	0	0	0	0	0	1
NINJ2	0	0	0	0	0	0	0	0	0	0	0	1	0	0	0	0	0	0	0	0	0	0	0	0	0	0	0	0	1
C12orf57	0	0	0	0	0	0	0	0	0	0	0	1	0	0	0	0	0	0	0	0	0	0	0	0	0	0	0	0	1
AFTPH	0	0	0	0	0	0	0	0	0	0	0	1	0	0	0	0	0	0	0	0	0	0	0	0	0	0	0	0	1
HLA-DQA1	0	0	0	0	0	0	0	0	0	0	0	1	0	0	0	0	0	0	0	0	0	0	0	0	0	0	0	0	1
CCL22	0	0	0	0	0	0	0	0	0	0	0	1	0	0	0	0	0	0	0	0	0	0	0	0	0	0	0	0	1
CLNK	0	0	0	0	0	0	0	0	0	0	0	1	0	0	0	0	0	0	0	0	0	0	0	0	0	0	0	0	1
HDAC7	0	0	0	0	0	0	0	0	0	0	0	1	0	0	0	0	0	0	0	0	0	0	0	0	0	0	0	0	1
CUTA	0	0	0	0	0	0	0	0	0	0	0	1	0	0	0	0	0	0	0	0	0	0	0	0	0	0	0	0	1
SLC38A2	0	0	0	0	0	0	0	0	0	0	0	1	0	0	0	0	0	0	0	0	0	0	0	0	0	0	0	0	1
SLC39A1	0	0	0	0	0	0	0	0	0	0	0	1	0	0	0	0	0	0	0	0	0	0	0	0	0	0	0	0	1
ATP5J2	0	0	0	0	0	0	0	0	0	0	0	1	0	0	0	0	0	0	0	0	0	0	0	0	0	0	0	0	1
PRG2	0	0	0	0	0	0	0	0	0	0	0	1	0	0	0	0	0	0	0	0	0	0	0	0	0	0	0	0	1
PAM	0	0	0	0	0	0	0	0	0	0	0	1	0	0	0	0	0	0	0	0	0	0	0	0	0	0	0	0	1
NME3	0	0	0	0	0	0	0	0	0	0	0	1	0	0	0	0	0	0	0	0	0	0	0	0	0	0	0	0	1
GRINA	0	0	0	0	0	0	0	0	0	0	0	1	0	0	0	0	0	0	0	0	0	0	0	0	0	0	0	0	1
PRKCDBP	0	0	0	0	0	0	0	0	0	0	0	1	0	0	0	0	0	0	0	0	0	0	0	0	0	0	0	0	1
SERPINB9	0	0	0	0	0	0	0	0	0	0	0	1	0	0	0	0	0	0	0	0	0	0	0	0	0	0	0	0	1
EDF1	0	0	0	0	0	0	0	0	0	0	0	1	0	0	0	0	0	0	0	0	0	0	0	0	0	0	0	0	1
ADPRH	0	0	0	0	0	0	0	0	0	0	0	1	0	0	0	0	0	0	0	0	0	0	0	0	0	0	0	0	1
FAM129A	0	0	0	0	0	0	0	0	0	0	0	1	0	0	0	0	0	0	0	0	0	0	0	0	0	0	0	0	1
REL	0	0	0	0	0	0	0	0	0	0	0	1	0	0	0	0	0	0	0	0	0	0	0	0	0	0	0	0	1
TRAF1	0	0	0	0	0	0	0	0	0	0	0	1	0	0	0	0	0	0	0	0	0	0	0	0	0	0	0	0	1
THADA	0	0	0	0	0	0	0	0	0	0	0	1	0	0	0	0	0	0	0	0	0	0	0	0	0	0	0	0	1
TPP1	0	0	0	0	0	0	0	0	0	0	0	1	0	0	0	0	0	0	0	0	0	0	0	0	0	0	0	0	1
ADAT2	0	0	0	0	0	0	0	0	0	0	0	1	0	0	0	0	0	0	0	0	0	0	0	0	0	0	0	0	1
DESI1	0	0	0	0	0	0	0	0	0	0	0	1	0	0	0	0	0	0	0	0	0	0	0	0	0	0	0	0	1
COL9A2	0	0	0	0	0	0	0	0	0	0	0	1	0	0	0	0	0	0	0	0	0	0	0	0	0	0	0	0	1
CALM3	0	0	0	0	0	0	0	0	0	0	0	1	0	0	0	0	0	0	0	0	0	0	0	0	0	0	0	0	1
ACTA2	0	0	0	0	0	0	0	0	0	0	0	1	0	0	0	0	0	0	0	0	0	0	0	0	0	0	0	0	1
FAM53B	0	0	0	0	0	0	0	0	0	0	0	1	0	0	0	0	0	0	0	0	0	0	0	0	0	0	0	0	1
DFNB31	0	0	0	0	0	0	0	0	0	0	0	1	0	0	0	0	0	0	0	0	0	0	0	0	0	0	0	0	1
SNX5	0	0	0	0	0	0	0	0	0	0	0	1	0	0	0	0	0	0	0	0	0	0	0	0	0	0	0	0	1
COX8A	0	0	0	0	0	0	0	0	0	0	0	1	0	0	0	0	0	0	0	0	0	0	0	0	0	0	0	0	1
LINC01588	0	0	0	0	0	0	0	0	0	0	0	1	0	0	0	0	0	0	0	0	0	0	0	0	0	0	0	0	1
GK	0	0	0	0	0	0	0	0	0	0	0	1	0	0	0	0	0	0	0	0	0	0	0	0	0	0	0	0	1
ACTR3C	0	0	0	0	0	0	0	0	0	0	0	1	0	0	0	0	0	0	0	0	0	0	0	0	0	0	0	0	1
CUL9	0	0	0	0	0	0	0	0	0	0	0	1	0	0	0	0	0	0	0	0	0	0	0	0	0	0	0	0	1
TRAF3	0	0	0	0	0	0	0	0	0	0	0	1	0	0	0	0	0	0	0	0	0	0	0	0	0	0	0	0	1
ATP5F1B	0	0	0	0	0	0	0	0	0	0	0	1	0	0	0	0	0	0	0	0	0	0	0	0	0	0	0	0	1
WHRN	0	0	0	0	0	0	0	0	0	0	0	1	0	0	0	0	0	0	0	0	0	0	0	0	0	0	0	0	1
ZSWIM1	0	0	0	0	0	0	0	0	0	0	0	0	1	0	0	0	0	0	0	0	0	0	0	0	0	0	0	0	1
NPRL3	0	0	0	0	0	0	0	0	0	0	0	0	1	0	0	0	0	0	0	0	0	0	0	0	0	0	0	0	1
GOLGA7	0	0	0	0	0	0	0	0	0	0	0	0	1	0	0	0	0	0	0	0	0	0	0	0	0	0	0	0	1
ST6GALNAC4	0	0	0	0	0	0	0	0	0	0	0	0	1	0	0	0	0	0	0	0	0	0	0	0	0	0	0	0	1
CDC16	0	0	0	0	0	0	0	0	0	0	0	0	1	0	0	0	0	0	0	0	0	0	0	0	0	0	0	0	1
ITPK1	0	0	0	0	0	0	0	0	0	0	0	0	1	0	0	0	0	0	0	0	0	0	0	0	0	0	0	0	1
PCSK4	0	0	0	0	0	0	0	0	0	0	0	0	1	0	0	0	0	0	0	0	0	0	0	0	0	0	0	0	1
CD8A	0	0	0	0	0	0	0	0	0	0	0	0	0	1	0	0	0	0	0	0	0	0	0	0	0	0	0	0	1
BTG1	0	0	0	0	0	0	0	0	0	0	0	0	0	0	0	1	0	0	0	0	0	0	0	0	0	0	0	0	1
JUND	0	0	0	0	0	0	0	0	0	0	0	0	0	0	0	1	0	0	0	0	0	0	0	0	0	0	0	0	1
IER3	0	0	0	0	0	0	0	0	0	0	0	0	0	0	0	1	0	0	0	0	0	0	0	0	0	0	0	0	1
CMTM8	0	0	0	0	0	0	0	0	0	0	0	0	0	0	1	0	0	0	0	0	0	0	0	0	0	0	0	0	1
SH3YL1	0	0	0	0	0	0	0	0	0	0	0	0	0	0	1	0	0	0	0	0	0	0	0	0	0	0	0	0	1
SPINT2	0	0	0	0	0	0	0	0	0	0	0	0	0	0	1	0	0	0	0	0	0	0	0	0	0	0	0	0	1
SOCS3	0	0	0	0	0	0	0	0	0	0	0	0	0	0	1	0	0	0	0	0	0	0	0	0	0	0	0	0	1
AAED1	0	0	0	0	0	0	0	0	0	0	0	0	0	0	1	0	0	0	0	0	0	0	0	0	0	0	0	0	1
SNAPC1	0	0	0	0	0	0	0	0	0	0	0	0	0	0	1	0	0	0	0	0	0	0	0	0	0	0	0	0	1
LSR	0	0	0	0	0	0	0	0	0	0	0	0	0	0	1	0	0	0	0	0	0	0	0	0	0	0	0	0	1
RPS13	0	0	0	0	0	0	0	0	0	0	0	0	0	0	1	0	0	0	0	0	0	0	0	0	0	0	0	0	1
RPL21	0	0	0	0	0	0	0	0	0	0	0	0	0	0	1	0	0	0	0	0	0	0	0	0	0	0	0	0	1
GIMAP5	0	0	0	0	0	0	0	0	0	0	0	0	0	0	1	0	0	0	0	0	0	0	0	0	0	0	0	0	1
RPL30	0	0	0	0	0	0	0	0	0	0	0	0	0	0	1	0	0	0	0	0	0	0	0	0	0	0	0	0	1
PRXL2C	0	0	0	0	0	0	0	0	0	0	0	0	0	0	1	0	0	0	0	0	0	0	0	0	0	0	0	0	1
AGMAT	1	0	0	0	0	0	0	0	0	0	0	0	0	0	0	0	0	0	0	0	0	0	0	0	0	0	0	0	1
AMIGO1	1	0	0	0	0	0	0	0	0	0	0	0	0	0	0	0	0	0	0	0	0	0	0	0	0	0	0	0	1
ATP8B2	1	0	0	0	0	0	0	0	0	0	0	0	0	0	0	0	0	0	0	0	0	0	0	0	0	0	0	0	1
BEX5	1	0	0	0	0	0	0	0	0	0	0	0	0	0	0	0	0	0	0	0	0	0	0	0	0	0	0	0	1
DVL3	1	0	0	0	0	0	0	0	0	0	0	0	0	0	0	0	0	0	0	0	0	0	0	0	0	0	0	0	1
GPRASP1	1	0	0	0	0	0	0	0	0	0	0	0	0	0	0	0	0	0	0	0	0	0	0	0	0	0	0	0	1
HEMGN	1	0	0	0	0	0	0	0	0	0	0	0	0	0	0	0	0	0	0	0	0	0	0	0	0	0	0	0	1
LRRN3	1	0	0	0	0	0	0	0	0	0	0	0	0	0	0	0	0	0	0	0	0	0	0	0	0	0	0	0	1
MGP	1	0	0	0	0	0	0	0	0	0	0	0	0	0	0	0	0	0	0	0	0	0	0	0	0	0	0	0	1
NR3C2	1	0	0	0	0	0	0	0	0	0	0	0	0	0	0	0	0	0	0	0	0	0	0	0	0	0	0	0	1
PPP1R13B	1	0	0	0	0	0	0	0	0	0	0	0	0	0	0	0	0	0	0	0	0	0	0	0	0	0	0	0	1
SMAGP	1	0	0	0	0	0	0	0	0	0	0	0	0	0	0	0	0	0	0	0	0	0	0	0	0	0	0	0	1
STRN4	1	0	0	0	0	0	0	0	0	0	0	0	0	0	0	0	0	0	0	0	0	0	0	0	0	0	0	0	1
TCEA3	1	0	0	0	0	0	0	0	0	0	0	0	0	0	0	0	0	0	0	0	0	0	0	0	0	0	0	0	1
ZNF540	1	0	0	0	0	0	0	0	0	0	0	0	0	0	0	0	0	0	0	0	0	0	0	0	0	0	0	0	1
LINC01963	0	1	0	0	0	0	0	0	0	0	0	0	0	0	0	0	0	0	0	0	0	0	0	0	0	0	0	0	1
AL357033.4	0	1	0	0	0	0	0	0	0	0	0	0	0	0	0	0	0	0	0	0	0	0	0	0	0	0	0	0	1
LINC01980	0	1	0	0	0	0	0	0	0	0	0	0	0	0	0	0	0	0	0	0	0	0	0	0	0	0	0	0	1
AL132989.1	0	1	0	0	0	0	0	0	0	0	0	0	0	0	0	0	0	0	0	0	0	0	0	0	0	0	0	0	1
AATBC	0	1	0	0	0	0	0	0	0	0	0	0	0	0	0	0	0	0	0	0	0	0	0	0	0	0	0	0	1
ELF3-AS1	0	1	0	0	0	0	0	0	0	0	0	0	0	0	0	0	0	0	0	0	0	0	0	0	0	0	0	0	1
AC135050.6	0	1	0	0	0	0	0	0	0	0	0	0	0	0	0	0	0	0	0	0	0	0	0	0	0	0	0	0	1
AL161431.1	0	1	0	0	0	0	0	0	0	0	0	0	0	0	0	0	0	0	0	0	0	0	0	0	0	0	0	0	1
AC106820.3	0	1	0	0	0	0	0	0	0	0	0	0	0	0	0	0	0	0	0	0	0	0	0	0	0	0	0	0	1
AL451085.2	0	1	0	0	0	0	0	0	0	0	0	0	0	0	0	0	0	0	0	0	0	0	0	0	0	0	0	0	1
AC007991.2	0	1	0	0	0	0	0	0	0	0	0	0	0	0	0	0	0	0	0	0	0	0	0	0	0	0	0	0	1
AC136475.2	0	1	0	0	0	0	0	0	0	0	0	0	0	0	0	0	0	0	0	0	0	0	0	0	0	0	0	0	1
AC012467.2	0	1	0	0	0	0	0	0	0	0	0	0	0	0	0	0	0	0	0	0	0	0	0	0	0	0	0	0	1
AC144831.1	0	1	0	0	0	0	0	0	0	0	0	0	0	0	0	0	0	0	0	0	0	0	0	0	0	0	0	0	1
AC116914.2	0	1	0	0	0	0	0	0	0	0	0	0	0	0	0	0	0	0	0	0	0	0	0	0	0	0	0	0	1
AC008115.3	0	1	0	0	0	0	0	0	0	0	0	0	0	0	0	0	0	0	0	0	0	0	0	0	0	0	0	0	1
PSMA3-AS1	0	1	0	0	0	0	0	0	0	0	0	0	0	0	0	0	0	0	0	0	0	0	0	0	0	0	0	0	1
PCED1B-AS1	0	1	0	0	0	0	0	0	0	0	0	0	0	0	0	0	0	0	0	0	0	0	0	0	0	0	0	0	1
AL139158.2	0	1	0	0	0	0	0	0	0	0	0	0	0	0	0	0	0	0	0	0	0	0	0	0	0	0	0	0	1
EP300-AS1	0	1	0	0	0	0	0	0	0	0	0	0	0	0	0	0	0	0	0	0	0	0	0	0	0	0	0	0	1
AC104083.1	0	1	0	0	0	0	0	0	0	0	0	0	0	0	0	0	0	0	0	0	0	0	0	0	0	0	0	0	1
AL022328.2	0	1	0	0	0	0	0	0	0	0	0	0	0	0	0	0	0	0	0	0	0	0	0	0	0	0	0	0	1
AC012640.2	0	1	0	0	0	0	0	0	0	0	0	0	0	0	0	0	0	0	0	0	0	0	0	0	0	0	0	0	1
PAX8-AS1	0	1	0	0	0	0	0	0	0	0	0	0	0	0	0	0	0	0	0	0	0	0	0	0	0	0	0	0	1
AL450992.2	0	1	0	0	0	0	0	0	0	0	0	0	0	0	0	0	0	0	0	0	0	0	0	0	0	0	0	0	1
HSPA1B	0	0	0	0	0	1	0	0	0	0	0	0	0	0	0	0	0	0	0	0	0	0	0	0	0	0	0	0	1
DNAJB1	0	0	0	0	0	1	0	0	0	0	0	0	0	0	0	0	0	0	0	0	0	0	0	0	0	0	0	0	1
HSPA6	0	0	0	0	0	1	0	0	0	0	0	0	0	0	0	0	0	0	0	0	0	0	0	0	0	0	0	0	1
ZFAND2A	0	0	0	0	0	1	0	0	0	0	0	0	0	0	0	0	0	0	0	0	0	0	0	0	0	0	0	0	1
BAG3	0	0	0	0	0	1	0	0	0	0	0	0	0	0	0	0	0	0	0	0	0	0	0	0	0	0	0	0	1
SERPINH1	0	0	0	0	0	1	0	0	0	0	0	0	0	0	0	0	0	0	0	0	0	0	0	0	0	0	0	0	1
JUN	0	0	0	0	0	1	0	0	0	0	0	0	0	0	0	0	0	0	0	0	0	0	0	0	0	0	0	0	1
NR4A1	0	0	0	0	0	1	0	0	0	0	0	0	0	0	0	0	0	0	0	0	0	0	0	0	0	0	0	0	1
DNAJB4	0	0	0	0	0	1	0	0	0	0	0	0	0	0	0	0	0	0	0	0	0	0	0	0	0	0	0	0	1
DUSP1	0	0	0	0	0	1	0	0	0	0	0	0	0	0	0	0	0	0	0	0	0	0	0	0	0	0	0	0	1
MRPL18	0	0	0	0	0	1	0	0	0	0	0	0	0	0	0	0	0	0	0	0	0	0	0	0	0	0	0	0	1
HSP90AA1	0	0	0	0	0	1	0	0	0	0	0	0	0	0	0	0	0	0	0	0	0	0	0	0	0	0	0	0	1
HSPE1	0	0	0	0	0	1	0	0	0	0	0	0	0	0	0	0	0	0	0	0	0	0	0	0	0	0	0	0	1
DNAJA1	0	0	0	0	0	1	0	0	0	0	0	0	0	0	0	0	0	0	0	0	0	0	0	0	0	0	0	0	1
FOSB	0	0	0	0	0	1	0	0	0	0	0	0	0	0	0	0	0	0	0	0	0	0	0	0	0	0	0	0	1
ATF3	0	0	0	0	0	1	0	0	0	0	0	0	0	0	0	0	0	0	0	0	0	0	0	0	0	0	0	0	1
FKBP4	0	0	0	0	0	1	0	0	0	0	0	0	0	0	0	0	0	0	0	0	0	0	0	0	0	0	0	0	1
HSPH1	0	0	0	0	0	1	0	0	0	0	0	0	0	0	0	0	0	0	0	0	0	0	0	0	0	0	0	0	1
KLF6	0	0	0	0	0	1	0	0	0	0	0	0	0	0	0	0	0	0	0	0	0	0	0	0	0	0	0	0	1
DEDD2	0	0	0	0	0	1	0	0	0	0	0	0	0	0	0	0	0	0	0	0	0	0	0	0	0	0	0	0	1
MXD1	0	0	0	0	0	1	0	0	0	0	0	0	0	0	0	0	0	0	0	0	0	0	0	0	0	0	0	0	1
PPP1R15A	0	0	0	0	0	1	0	0	0	0	0	0	0	0	0	0	0	0	0	0	0	0	0	0	0	0	0	0	1
ANKRD37	0	0	0	0	0	1	0	0	0	0	0	0	0	0	0	0	0	0	0	0	0	0	0	0	0	0	0	0	1
HSPD1	0	0	0	0	0	1	0	0	0	0	0	0	0	0	0	0	0	0	0	0	0	0	0	0	0	0	0	0	1
RHOB	0	0	0	0	0	1	0	0	0	0	0	0	0	0	0	0	0	0	0	0	0	0	0	0	0	0	0	0	1
CHORDC1	0	0	0	0	0	1	0	0	0	0	0	0	0	0	0	0	0	0	0	0	0	0	0	0	0	0	0	0	1
NEU1	0	0	0	0	0	1	0	0	0	0	0	0	0	0	0	0	0	0	0	0	0	0	0	0	0	0	0	0	1
AHSA1	0	0	0	0	0	1	0	0	0	0	0	0	0	0	0	0	0	0	0	0	0	0	0	0	0	0	0	0	1
RGS2	0	0	0	0	0	1	0	0	0	0	0	0	0	0	0	0	0	0	0	0	0	0	0	0	0	0	0	0	1
CITED2	0	0	0	0	0	1	0	0	0	0	0	0	0	0	0	0	0	0	0	0	0	0	0	0	0	0	0	0	1
HSPA8	0	0	0	0	0	1	0	0	0	0	0	0	0	0	0	0	0	0	0	0	0	0	0	0	0	0	0	0	1
CLK1	0	0	0	0	0	1	0	0	0	0	0	0	0	0	0	0	0	0	0	0	0	0	0	0	0	0	0	0	1
TUBA1A	0	0	0	0	0	1	0	0	0	0	0	0	0	0	0	0	0	0	0	0	0	0	0	0	0	0	0	0	1
TAGAP	0	0	0	0	0	1	0	0	0	0	0	0	0	0	0	0	0	0	0	0	0	0	0	0	0	0	0	0	1
MIR24-2	0	0	0	0	0	1	0	0	0	0	0	0	0	0	0	0	0	0	0	0	0	0	0	0	0	0	0	0	1
DDIT3	0	0	0	0	0	1	0	0	0	0	0	0	0	0	0	0	0	0	0	0	0	0	0	0	0	0	0	0	1
SERTAD1	0	0	0	0	0	1	0	0	0	0	0	0	0	0	0	0	0	0	0	0	0	0	0	0	0	0	0	0	1
CDC42EP3	0	0	0	0	0	1	0	0	0	0	0	0	0	0	0	0	0	0	0	0	0	0	0	0	0	0	0	0	1
GADD45B	0	0	0	0	0	1	0	0	0	0	0	0	0	0	0	0	0	0	0	0	0	0	0	0	0	0	0	0	1
ABHD3	0	0	0	0	0	1	0	0	0	0	0	0	0	0	0	0	0	0	0	0	0	0	0	0	0	0	0	0	1
BTG2	0	0	0	0	0	1	0	0	0	0	0	0	0	0	0	0	0	0	0	0	0	0	0	0	0	0	0	0	1
AFF3	0	0	1	0	0	0	0	0	0	0	0	0	0	0	0	0	0	0	0	0	0	0	0	0	0	0	0	0	1
SLAMF6	0	0	1	0	0	0	0	0	0	0	0	0	0	0	0	0	0	0	0	0	0	0	0	0	0	0	0	0	1
OTX1	0	0	1	0	0	0	0	0	0	0	0	0	0	0	0	0	0	0	0	0	0	0	0	0	0	0	0	0	1
TNFRSF25	0	0	1	0	0	0	0	0	0	0	0	0	0	0	0	0	0	0	0	0	0	0	0	0	0	0	0	0	1
VAT1L	0	0	1	0	0	0	0	0	0	0	0	0	0	0	0	0	0	0	0	0	0	0	0	0	0	0	0	0	1
HECTD2	0	0	1	0	0	0	0	0	0	0	0	0	0	0	0	0	0	0	0	0	0	0	0	0	0	0	0	0	1
MAPK11	0	0	1	0	0	0	0	0	0	0	0	0	0	0	0	0	0	0	0	0	0	0	0	0	0	0	0	0	1
FAM84A	0	0	1	0	0	0	0	0	0	0	0	0	0	0	0	0	0	0	0	0	0	0	0	0	0	0	0	0	1
LIF	0	0	1	0	0	0	0	0	0	0	0	0	0	0	0	0	0	0	0	0	0	0	0	0	0	0	0	0	1
TREML2	0	0	1	0	0	0	0	0	0	0	0	0	0	0	0	0	0	0	0	0	0	0	0	0	0	0	0	0	1
SYNPO	0	0	1	0	0	0	0	0	0	0	0	0	0	0	0	0	0	0	0	0	0	0	0	0	0	0	0	0	1
WNT10A	0	0	1	0	0	0	0	0	0	0	0	0	0	0	0	0	0	0	0	0	0	0	0	0	0	0	0	0	1
KCNMB1	0	0	1	0	0	0	0	0	0	0	0	0	0	0	0	0	0	0	0	0	0	0	0	0	0	0	0	0	1
CD40LG	0	0	1	0	0	0	0	0	0	0	0	0	0	0	0	0	0	0	0	0	0	0	0	0	0	0	0	0	1
DTX1	0	0	1	0	0	0	0	0	0	0	0	0	0	0	0	0	0	0	0	0	0	0	0	0	0	0	0	0	1
DHRS3	0	0	1	0	0	0	0	0	0	0	0	0	0	0	0	0	0	0	0	0	0	0	0	0	0	0	0	0	1
ST8SIA1	0	0	1	0	0	0	0	0	0	0	0	0	0	0	0	0	0	0	0	0	0	0	0	0	0	0	0	0	1
TNFRSF13B	0	0	1	0	0	0	0	0	0	0	0	0	0	0	0	0	0	0	0	0	0	0	0	0	0	0	0	0	1
CXXC5	0	0	1	0	0	0	0	0	0	0	0	0	0	0	0	0	0	0	0	0	0	0	0	0	0	0	0	0	1
PLA2G4F	0	0	1	0	0	0	0	0	0	0	0	0	0	0	0	0	0	0	0	0	0	0	0	0	0	0	0	0	1
CYR61	0	0	1	0	0	0	0	0	0	0	0	0	0	0	0	0	0	0	0	0	0	0	0	0	0	0	0	0	1
S1PR5	0	0	1	0	0	0	0	0	0	0	0	0	0	0	0	0	0	0	0	0	0	0	0	0	0	0	0	0	1
SH2B3	0	0	1	0	0	0	0	0	0	0	0	0	0	0	0	0	0	0	0	0	0	0	0	0	0	0	0	0	1
LRIG1	0	0	1	0	0	0	0	0	0	0	0	0	0	0	0	0	0	0	0	0	0	0	0	0	0	0	0	0	1
SSPO	0	0	1	0	0	0	0	0	0	0	0	0	0	0	0	0	0	0	0	0	0	0	0	0	0	0	0	0	1
P2RX7	0	0	1	0	0	0	0	0	0	0	0	0	0	0	0	0	0	0	0	0	0	0	0	0	0	0	0	0	1
IFNGR1	0	0	0	0	0	0	0	1	0	0	0	0	0	0	0	0	0	0	0	0	0	0	0	0	0	0	0	0	1
NFKBIA	0	0	0	0	0	0	0	1	0	0	0	0	0	0	0	0	0	0	0	0	0	0	0	0	0	0	0	0	1
ODF2L	0	0	0	0	0	0	0	1	0	0	0	0	0	0	0	0	0	0	0	0	0	0	0	0	0	0	0	0	1
ZFP36	0	0	0	0	0	0	0	1	0	0	0	0	0	0	0	0	0	0	0	0	0	0	0	0	0	0	0	0	1
EIF3E	0	0	0	0	0	0	0	1	0	0	0	0	0	0	0	0	0	0	0	0	0	0	0	0	0	0	0	0	1
TPT1	0	0	0	0	0	0	0	1	0	0	0	0	0	0	0	0	0	0	0	0	0	0	0	0	0	0	0	0	1
FKBP11	0	0	0	0	0	0	0	1	0	0	0	0	0	0	0	0	0	0	0	0	0	0	0	0	0	0	0	0	1
RPL22	0	0	0	0	0	0	0	1	0	0	0	0	0	0	0	0	0	0	0	0	0	0	0	0	0	0	0	0	1
RPL5	0	0	0	0	0	0	0	1	0	0	0	0	0	0	0	0	0	0	0	0	0	0	0	0	0	0	0	0	1
PFKFB3	0	0	0	0	0	0	0	1	0	0	0	0	0	0	0	0	0	0	0	0	0	0	0	0	0	0	0	0	1
RPL17	0	0	0	0	0	0	0	1	0	0	0	0	0	0	0	0	0	0	0	0	0	0	0	0	0	0	0	0	1
ZFP36L2	0	0	0	0	0	0	0	1	0	0	0	0	0	0	0	0	0	0	0	0	0	0	0	0	0	0	0	0	1
NDFIP1	0	0	0	0	0	0	0	1	0	0	0	0	0	0	0	0	0	0	0	0	0	0	0	0	0	0	0	0	1
RPSA	0	0	0	0	0	0	0	1	0	0	0	0	0	0	0	0	0	0	0	0	0	0	0	0	0	0	0	0	1
GCHFR	0	0	0	0	0	0	0	1	0	0	0	0	0	0	0	0	0	0	0	0	0	0	0	0	0	0	0	0	1
ARL4A	0	0	0	0	0	0	0	1	0	0	0	0	0	0	0	0	0	0	0	0	0	0	0	0	0	0	0	0	1
SOCS1	0	0	0	0	0	0	0	1	0	0	0	0	0	0	0	0	0	0	0	0	0	0	0	0	0	0	0	0	1
RPL7	0	0	0	0	0	0	0	1	0	0	0	0	0	0	0	0	0	0	0	0	0	0	0	0	0	0	0	0	1
RPL10A	0	0	0	0	0	0	0	1	0	0	0	0	0	0	0	0	0	0	0	0	0	0	0	0	0	0	0	0	1
MT1X	0	0	0	0	1	0	0	0	0	0	0	0	0	0	0	0	0	0	0	0	0	0	0	0	0	0	0	0	1
MT1E	0	0	0	0	1	0	0	0	0	0	0	0	0	0	0	0	0	0	0	0	0	0	0	0	0	0	0	0	1
S100A11	0	0	0	0	1	0	0	0	0	0	0	0	0	0	0	0	0	0	0	0	0	0	0	0	0	0	0	0	1
YWHAH	0	0	0	0	1	0	0	0	0	0	0	0	0	0	0	0	0	0	0	0	0	0	0	0	0	0	0	0	1
S100A6	0	0	0	0	1	0	0	0	0	0	0	0	0	0	0	0	0	0	0	0	0	0	0	0	0	0	0	0	1
ADGRE5	0	0	0	0	1	0	0	0	0	0	0	0	0	0	0	0	0	0	0	0	0	0	0	0	0	0	0	0	1
CRIP1	0	0	0	0	1	0	0	0	0	0	0	0	0	0	0	0	0	0	0	0	0	0	0	0	0	0	0	0	1
IGFBP7	0	0	0	0	1	0	0	0	0	0	0	0	0	0	0	0	0	0	0	0	0	0	0	0	0	0	0	0	1
HOXB2	0	0	0	0	1	0	0	0	0	0	0	0	0	0	0	0	0	0	0	0	0	0	0	0	0	0	0	0	1
SPARC	0	0	0	0	1	0	0	0	0	0	0	0	0	0	0	0	0	0	0	0	0	0	0	0	0	0	0	0	1
ADAM19	0	0	0	0	1	0	0	0	0	0	0	0	0	0	0	0	0	0	0	0	0	0	0	0	0	0	0	0	1
ANKRD28	0	0	0	0	1	0	0	0	0	0	0	0	0	0	0	0	0	0	0	0	0	0	0	0	0	0	0	0	1
AHNAK	0	0	0	0	1	0	0	0	0	0	0	0	0	0	0	0	0	0	0	0	0	0	0	0	0	0	0	0	1
RBPJ	0	0	0	0	1	0	0	0	0	0	0	0	0	0	0	0	0	0	0	0	0	0	0	0	0	0	0	0	1
PLEC	0	0	0	0	1	0	0	0	0	0	0	0	0	0	0	0	0	0	0	0	0	0	0	0	0	0	0	0	1
DSE	0	0	0	0	1	0	0	0	0	0	0	0	0	0	0	0	0	0	0	0	0	0	0	0	0	0	0	0	1
MT1F	0	0	0	0	1	0	0	0	0	0	0	0	0	0	0	0	0	0	0	0	0	0	0	0	0	0	0	0	1
ATP2B1	0	0	0	0	1	0	0	0	0	0	0	0	0	0	0	0	0	0	0	0	0	0	0	0	0	0	0	0	1
CLU	0	0	0	0	1	0	0	0	0	0	0	0	0	0	0	0	0	0	0	0	0	0	0	0	0	0	0	0	1
LINC01943	0	0	0	0	1	0	0	0	0	0	0	0	0	0	0	0	0	0	0	0	0	0	0	0	0	0	0	0	1
RUNX2	0	0	0	0	1	0	0	0	0	0	0	0	0	0	0	0	0	0	0	0	0	0	0	0	0	0	0	0	1
TIMP1	0	0	0	0	1	0	0	0	0	0	0	0	0	0	0	0	0	0	0	0	0	0	0	0	0	0	0	0	1
MIR155HG	0	0	0	0	1	0	0	0	0	0	0	0	0	0	0	0	0	0	0	0	0	0	0	0	0	0	0	0	1
MSC	0	0	0	0	1	0	0	0	0	0	0	0	0	0	0	0	0	0	0	0	0	0	0	0	0	0	0	0	1
GPR25	0	0	0	0	1	0	0	0	0	0	0	0	0	0	0	0	0	0	0	0	0	0	0	0	0	0	0	0	1
MT-CYB	0	0	0	0	0	0	1	0	0	0	0	0	0	0	0	0	0	0	0	0	0	0	0	0	0	0	0	0	1
MT-ATP6	0	0	0	0	0	0	1	0	0	0	0	0	0	0	0	0	0	0	0	0	0	0	0	0	0	0	0	0	1
MT-CO1	0	0	0	0	0	0	1	0	0	0	0	0	0	0	0	0	0	0	0	0	0	0	0	0	0	0	0	0	1
MT-CO2	0	0	0	0	0	0	1	0	0	0	0	0	0	0	0	0	0	0	0	0	0	0	0	0	0	0	0	0	1
MT-CO3	0	0	0	0	0	0	1	0	0	0	0	0	0	0	0	0	0	0	0	0	0	0	0	0	0	0	0	0	1
MT-ND4	0	0	0	0	0	0	1	0	0	0	0	0	0	0	0	0	0	0	0	0	0	0	0	0	0	0	0	0	1
MT-ND4L	0	0	0	0	0	0	1	0	0	0	0	0	0	0	0	0	0	0	0	0	0	0	0	0	0	0	0	0	1
MT-ND5	0	0	0	0	0	0	1	0	0	0	0	0	0	0	0	0	0	0	0	0	0	0	0	0	0	0	0	0	1
MT-ND3	0	0	0	0	0	0	1	0	0	0	0	0	0	0	0	0	0	0	0	0	0	0	0	0	0	0	0	0	1
MALAT1	0	0	0	0	0	0	1	0	0	0	0	0	0	0	0	0	0	0	0	0	0	0	0	0	0	0	0	0	1
CXCL3	0	0	0	0	0	0	0	0	0	0	1	0	0	0	0	0	0	0	0	0	0	0	0	0	0	0	0	0	1
CXCL1	0	0	0	0	0	0	0	0	0	0	1	0	0	0	0	0	0	0	0	0	0	0	0	0	0	0	0	0	1
IL1A	0	0	0	0	0	0	0	0	0	0	1	0	0	0	0	0	0	0	0	0	0	0	0	0	0	0	0	0	1
CCL5	0	0	0	0	0	0	0	0	0	0	1	0	0	0	0	0	0	0	0	0	0	0	0	0	0	0	0	0	1
TNFRSF12A	0	0	0	0	0	0	0	0	0	0	1	0	0	0	0	0	0	0	0	0	0	0	0	0	0	0	0	0	1
NFKB1	0	0	0	0	0	0	0	0	1	0	0	0	0	0	0	0	0	0	0	0	0	0	0	0	0	0	0	0	1
LMO7	0	0	0	0	0	0	0	0	1	0	0	0	0	0	0	0	0	0	0	0	0	0	0	0	0	0	0	0	1
YES1	0	0	0	0	0	0	0	0	1	0	0	0	0	0	0	0	0	0	0	0	0	0	0	0	0	0	0	0	1
ACTN1	0	0	0	0	0	0	0	0	1	0	0	0	0	0	0	0	0	0	0	0	0	0	0	0	0	0	0	0	1
JMJD1C	0	0	0	0	0	0	0	0	1	0	0	0	0	0	0	0	0	0	0	0	0	0	0	0	0	0	0	0	1
FAM107B	0	0	0	0	0	0	0	0	1	0	0	0	0	0	0	0	0	0	0	0	0	0	0	0	0	0	0	0	1
ELL2	0	0	0	0	0	0	0	0	1	0	0	0	0	0	0	0	0	0	0	0	0	0	0	0	0	0	0	0	1
TNFAIP8	0	0	0	0	0	0	0	0	1	0	0	0	0	0	0	0	0	0	0	0	0	0	0	0	0	0	0	0	1
SDCBP	0	0	0	0	0	0	0	0	1	0	0	0	0	0	0	0	0	0	0	0	0	0	0	0	0	0	0	0	1
TLE4	0	0	0	0	0	0	0	0	1	0	0	0	0	0	0	0	0	0	0	0	0	0	0	0	0	0	0	0	1
APBA2	0	0	0	0	0	0	0	0	1	0	0	0	0	0	0	0	0	0	0	0	0	0	0	0	0	0	0	0	1
ATM	0	0	0	0	0	0	0	0	1	0	0	0	0	0	0	0	0	0	0	0	0	0	0	0	0	0	0	0	1
ESCO2	0	0	0	0	0	0	0	0	0	1	0	0	0	0	0	0	0	0	0	0	0	0	0	0	0	0	0	0	1
CDC45	0	0	0	0	0	0	0	0	0	1	0	0	0	0	0	0	0	0	0	0	0	0	0	0	0	0	0	0	1
SHCBP1	0	0	0	0	0	0	0	0	0	1	0	0	0	0	0	0	0	0	0	0	0	0	0	0	0	0	0	0	1
DLGAP5	0	0	0	0	0	0	0	0	0	1	0	0	0	0	0	0	0	0	0	0	0	0	0	0	0	0	0	0	1
RAD51	0	0	0	0	0	0	0	0	0	1	0	0	0	0	0	0	0	0	0	0	0	0	0	0	0	0	0	0	1
KIF18B	0	0	0	0	0	0	0	0	0	1	0	0	0	0	0	0	0	0	0	0	0	0	0	0	0	0	0	0	1
HJURP	0	0	0	0	0	0	0	0	0	1	0	0	0	0	0	0	0	0	0	0	0	0	0	0	0	0	0	0	1
CCNB2	0	0	0	0	0	0	0	0	0	1	0	0	0	0	0	0	0	0	0	0	0	0	0	0	0	0	0	0	1
RAD51AP1	0	0	0	0	0	0	0	0	0	1	0	0	0	0	0	0	0	0	0	0	0	0	0	0	0	0	0	0	1
DTL	0	0	0	0	0	0	0	0	0	1	0	0	0	0	0	0	0	0	0	0	0	0	0	0	0	0	0	0	1
SPC24	0	0	0	0	0	0	0	0	0	1	0	0	0	0	0	0	0	0	0	0	0	0	0	0	0	0	0	0	1
CDCA3	0	0	0	0	0	0	0	0	0	1	0	0	0	0	0	0	0	0	0	0	0	0	0	0	0	0	0	0	1
MELK	0	0	0	0	0	0	0	0	0	1	0	0	0	0	0	0	0	0	0	0	0	0	0	0	0	0	0	0	1
ANLN	0	0	0	0	0	0	0	0	0	1	0	0	0	0	0	0	0	0	0	0	0	0	0	0	0	0	0	0	1
CDCA8	0	0	0	0	0	0	0	0	0	1	0	0	0	0	0	0	0	0	0	0	0	0	0	0	0	0	0	0	1
GGH	0	0	0	0	0	0	0	0	0	1	0	0	0	0	0	0	0	0	0	0	0	0	0	0	0	0	0	0	1
AURKB	0	0	0	0	0	0	0	0	0	1	0	0	0	0	0	0	0	0	0	0	0	0	0	0	0	0	0	0	1
NCAPG	0	0	0	0	0	0	0	0	0	1	0	0	0	0	0	0	0	0	0	0	0	0	0	0	0	0	0	0	1
DHFR	0	0	0	0	0	0	0	0	0	1	0	0	0	0	0	0	0	0	0	0	0	0	0	0	0	0	0	0	1
MLF1IP	0	0	0	0	0	0	0	0	0	1	0	0	0	0	0	0	0	0	0	0	0	0	0	0	0	0	0	0	1
TROAP	0	0	0	0	0	0	0	0	0	1	0	0	0	0	0	0	0	0	0	0	0	0	0	0	0	0	0	0	1
KIF2C	0	0	0	0	0	0	0	0	0	1	0	0	0	0	0	0	0	0	0	0	0	0	0	0	0	0	0	0	1
WDR34	0	0	0	0	0	0	0	0	0	1	0	0	0	0	0	0	0	0	0	0	0	0	0	0	0	0	0	0	1
KIF23	0	0	0	0	0	0	0	0	0	1	0	0	0	0	0	0	0	0	0	0	0	0	0	0	0	0	0	0	1
PLK1	0	0	0	0	0	0	0	0	0	1	0	0	0	0	0	0	0	0	0	0	0	0	0	0	0	0	0	0	1
NUF2	0	0	0	0	0	0	0	0	0	1	0	0	0	0	0	0	0	0	0	0	0	0	0	0	0	0	0	0	1
HMGB3	0	0	0	0	0	0	0	0	0	1	0	0	0	0	0	0	0	0	0	0	0	0	0	0	0	0	0	0	1
MCM2	0	0	0	0	0	0	0	0	0	1	0	0	0	0	0	0	0	0	0	0	0	0	0	0	0	0	0	0	1
ORC6	0	0	0	0	0	0	0	0	0	1	0	0	0	0	0	0	0	0	0	0	0	0	0	0	0	0	0	0	1
CASC5	0	0	0	0	0	0	0	0	0	1	0	0	0	0	0	0	0	0	0	0	0	0	0	0	0	0	0	0	1
PCLAF	0	0	0	0	0	0	0	0	0	1	0	0	0	0	0	0	0	0	0	0	0	0	0	0	0	0	0	0	1
KNL1	0	0	0	0	0	0	0	0	0	1	0	0	0	0	0	0	0	0	0	0	0	0	0	0	0	0	0	0	1
CD8B	0	0	0	1	0	0	0	0	0	0	0	0	0	0	0	0	0	0	0	0	0	0	0	0	0	0	0	0	1
HLA-DQA2	0	0	0	1	0	0	0	0	0	0	0	0	0	0	0	0	0	0	0	0	0	0	0	0	0	0	0	0	1
IL5	0	0	0	1	0	0	0	0	0	0	0	0	0	0	0	0	0	0	0	0	0	0	0	0	0	0	0	0	1
DUSP6	0	0	0	1	0	0	0	0	0	0	0	0	0	0	0	0	0	0	0	0	0	0	0	0	0	0	0	0	1
CSF2	0	0	0	1	0	0	0	0	0	0	0	0	0	0	0	0	0	0	0	0	0	0	0	0	0	0	0	0	1
UBE2S	0	0	0	1	0	0	0	0	0	0	0	0	0	0	0	0	0	0	0	0	0	0	0	0	0	0	0	0	1
AIF1	0	0	0	1	0	0	0	0	0	0	0	0	0	0	0	0	0	0	0	0	0	0	0	0	0	0	0	0	1
IFI27	0	0	0	1	0	0	0	0	0	0	0	0	0	0	0	0	0	0	0	0	0	0	0	0	0	0	0	0	1
KPNA2	0	0	0	1	0	0	0	0	0	0	0	0	0	0	0	0	0	0	0	0	0	0	0	0	0	0	0	0	1
UBE2T	0	0	0	1	0	0	0	0	0	0	0	0	0	0	0	0	0	0	0	0	0	0	0	0	0	0	0	0	1
H2AFX	0	0	0	1	0	0	0	0	0	0	0	0	0	0	0	0	0	0	0	0	0	0	0	0	0	0	0	0	1
CRTAM	0	0	0	1	0	0	0	0	0	0	0	0	0	0	0	0	0	0	0	0	0	0	0	0	0	0	0	0	1
GTSE1	0	0	0	1	0	0	0	0	0	0	0	0	0	0	0	0	0	0	0	0	0	0	0	0	0	0	0	0	1
MYBL2	0	0	0	1	0	0	0	0	0	0	0	0	0	0	0	0	0	0	0	0	0	0	0	0	0	0	0	0	1
AURKA	0	0	0	1	0	0	0	0	0	0	0	0	0	0	0	0	0	0	0	0	0	0	0	0	0	0	0	0	1
FEN1	0	0	0	1	0	0	0	0	0	0	0	0	0	0	0	0	0	0	0	0	0	0	0	0	0	0	0	0	1
ENPP5	0	0	0	0	0	0	0	0	0	0	0	0	0	0	0	0	1	0	0	0	0	0	0	0	0	0	0	0	1
RAPGEF5	0	0	0	0	0	0	0	0	0	0	0	0	0	0	0	0	1	0	0	0	0	0	0	0	0	0	0	0	1
SSBP2	0	0	0	0	0	0	0	0	0	0	0	0	0	0	0	0	1	0	0	0	0	0	0	0	0	0	0	0	1
GALNT3	0	0	0	0	0	0	0	0	0	0	0	0	0	0	0	0	1	0	0	0	0	0	0	0	0	0	0	0	1
MPP7	0	0	0	0	0	0	0	0	0	0	0	0	0	0	0	0	1	0	0	0	0	0	0	0	0	0	0	0	1
RASGRF2	0	0	0	0	0	0	0	0	0	0	0	0	0	0	0	0	1	0	0	0	0	0	0	0	0	0	0	0	1
RPS6KA2	0	0	0	0	0	0	0	0	0	0	0	0	0	0	0	0	1	0	0	0	0	0	0	0	0	0	0	0	1
SPART	0	0	0	0	0	0	0	0	0	0	0	0	0	0	0	0	1	0	0	0	0	0	0	0	0	0	0	0	1
PLCB1	0	0	0	0	0	0	0	0	0	0	0	0	0	0	0	0	1	0	0	0	0	0	0	0	0	0	0	0	1
DENND5A	0	0	0	0	0	0	0	0	0	0	0	0	0	0	0	0	1	0	0	0	0	0	0	0	0	0	0	0	1
CYB561	0	0	0	0	0	0	0	0	0	0	0	0	0	0	0	0	1	0	0	0	0	0	0	0	0	0	0	0	1
GCSAM	0	0	0	0	0	0	0	0	0	0	0	0	0	0	0	0	1	0	0	0	0	0	0	0	0	0	0	0	1
CD226	0	0	0	0	0	0	0	0	0	0	0	0	0	0	0	0	1	0	0	0	0	0	0	0	0	0	0	0	1
IL18RAP	0	0	0	0	0	0	0	0	0	0	0	0	0	0	0	0	1	0	0	0	0	0	0	0	0	0	0	0	1
TGFBI	0	0	0	0	0	0	0	0	0	0	0	0	0	0	0	0	1	0	0	0	0	0	0	0	0	0	0	0	1
TPRG1	0	0	0	0	0	0	0	0	0	0	0	0	0	0	0	0	1	0	0	0	0	0	0	0	0	0	0	0	1
RIMKLB	0	0	0	0	0	0	0	0	0	0	0	0	0	0	0	0	1	0	0	0	0	0	0	0	0	0	0	0	1
LRRC2	0	0	0	0	0	0	0	0	0	0	0	0	0	0	0	0	1	0	0	0	0	0	0	0	0	0	0	0	1
FAM241A	0	0	0	0	0	0	0	0	0	0	0	0	0	0	0	0	1	0	0	0	0	0	0	0	0	0	0	0	1
SPEF2	0	0	0	0	0	0	0	0	0	0	0	0	0	0	0	0	1	0	0	0	0	0	0	0	0	0	0	0	1
CAMK4	0	0	0	0	0	0	0	0	0	0	0	0	0	0	0	0	1	0	0	0	0	0	0	0	0	0	0	0	1
JAML	0	0	0	0	0	0	0	0	0	0	0	0	0	0	0	0	1	0	0	0	0	0	0	0	0	0	0	0	1
SESN1	0	0	0	0	0	0	0	0	0	0	0	0	0	0	0	0	1	0	0	0	0	0	0	0	0	0	0	0	1
TMEM71	0	0	0	0	0	0	0	0	0	0	0	0	0	0	0	0	1	0	0	0	0	0	0	0	0	0	0	0	1
MYBL1	0	0	0	0	0	0	0	0	0	0	0	0	0	0	0	0	1	0	0	0	0	0	0	0	0	0	0	0	1
LY9	0	0	0	0	0	0	0	0	0	0	0	0	0	0	0	0	1	0	0	0	0	0	0	0	0	0	0	0	1
ADRB2	0	0	0	0	0	0	0	0	0	0	0	0	0	0	0	0	1	0	0	0	0	0	0	0	0	0	0	0	1
SCML4	0	0	0	0	0	0	0	0	0	0	0	0	0	0	0	0	1	0	0	0	0	0	0	0	0	0	0	0	1
ABCB1	0	0	0	0	0	0	0	0	0	0	0	0	0	0	0	0	1	0	0	0	0	0	0	0	0	0	0	0	1
GLIPR1	0	0	0	0	0	0	0	0	0	0	0	0	0	0	0	0	1	0	0	0	0	0	0	0	0	0	0	0	1
KCNA3	0	0	0	0	0	0	0	0	0	0	0	0	0	0	0	0	1	0	0	0	0	0	0	0	0	0	0	0	1
MPZL3	0	0	0	0	0	0	0	0	0	0	0	0	0	0	0	0	1	0	0	0	0	0	0	0	0	0	0	0	1
CNOT6L	0	0	0	0	0	0	0	0	0	0	0	0	0	0	0	0	0	1	0	0	0	0	0	0	0	0	0	0	1
EZR	0	0	0	0	0	0	0	0	0	0	0	0	0	0	0	0	0	1	0	0	0	0	0	0	0	0	0	0	1
RNF19A	0	0	0	0	0	0	0	0	0	0	0	0	0	0	0	0	0	1	0	0	0	0	0	0	0	0	0	0	1
PDCD4	0	0	0	0	0	0	0	0	0	0	0	0	0	0	0	0	0	1	0	0	0	0	0	0	0	0	0	0	1
SMCHD1	0	0	0	0	0	0	0	0	0	0	0	0	0	0	0	0	0	1	0	0	0	0	0	0	0	0	0	0	1
DDX21	0	0	0	0	0	0	0	0	0	0	0	0	0	0	0	0	0	1	0	0	0	0	0	0	0	0	0	0	1
CHD1	0	0	0	0	0	0	0	0	0	0	0	0	0	0	0	0	0	1	0	0	0	0	0	0	0	0	0	0	1
BAZ1A	0	0	0	0	0	0	0	0	0	0	0	0	0	0	0	0	0	1	0	0	0	0	0	0	0	0	0	0	1
KTN1	0	0	0	0	0	0	0	0	0	0	0	0	0	0	0	0	0	1	0	0	0	0	0	0	0	0	0	0	1
ETS1	0	0	0	0	0	0	0	0	0	0	0	0	0	0	0	0	0	1	0	0	0	0	0	0	0	0	0	0	1
DDX3X	0	0	0	0	0	0	0	0	0	0	0	0	0	0	0	0	0	1	0	0	0	0	0	0	0	0	0	0	1
SKIL	0	0	0	0	0	0	0	0	0	0	0	0	0	0	0	0	0	1	0	0	0	0	0	0	0	0	0	0	1
PDE4B	0	0	0	0	0	0	0	0	0	0	0	0	0	0	0	0	0	1	0	0	0	0	0	0	0	0	0	0	1
MCL1	0	0	0	0	0	0	0	0	0	0	0	0	0	0	0	0	0	1	0	0	0	0	0	0	0	0	0	0	1
TSPYL2	0	0	0	0	0	0	0	0	0	0	0	0	0	0	0	0	0	1	0	0	0	0	0	0	0	0	0	0	1
GSPT1	0	0	0	0	0	0	0	0	0	0	0	0	0	0	0	0	0	1	0	0	0	0	0	0	0	0	0	0	1
EIF4G2	0	0	0	0	0	0	0	0	0	0	0	0	0	0	0	0	0	1	0	0	0	0	0	0	0	0	0	0	1
TGFB1	0	0	0	0	0	0	0	0	0	0	0	0	0	0	0	0	0	1	0	0	0	0	0	0	0	0	0	0	1
EIF4A3	0	0	0	0	0	0	0	0	0	0	0	0	0	0	0	0	0	1	0	0	0	0	0	0	0	0	0	0	1
PIK3R1	0	0	0	0	0	0	0	0	0	0	0	0	0	0	0	0	0	1	0	0	0	0	0	0	0	0	0	0	1
RSL1D1	0	0	0	0	0	0	0	0	0	0	0	0	0	0	0	0	0	1	0	0	0	0	0	0	0	0	0	0	1
RSL24D1	0	0	0	0	0	0	0	0	0	0	0	0	0	0	0	0	0	1	0	0	0	0	0	0	0	0	0	0	1
SLC7A5	0	0	0	0	0	0	0	0	0	0	0	0	0	0	0	0	0	1	0	0	0	0	0	0	0	0	0	0	1
FGFBP2	0	0	0	0	0	0	0	0	0	0	0	0	0	0	0	0	0	0	1	0	0	0	0	0	0	0	0	0	1
CDC25B	0	0	0	0	0	0	0	0	0	0	0	0	0	0	0	0	0	0	1	0	0	0	0	0	0	0	0	0	1
C10orf54	0	0	0	0	0	0	0	0	0	0	0	0	0	0	0	0	0	0	1	0	0	0	0	0	0	0	0	0	1
LINC00861	0	0	0	0	0	0	0	0	0	0	0	0	0	0	0	0	0	0	1	0	0	0	0	0	0	0	0	0	1
FAM65B	0	0	0	0	0	0	0	0	0	0	0	0	0	0	0	0	0	0	1	0	0	0	0	0	0	0	0	0	1
SLCO3A1	0	0	0	0	0	0	0	0	0	0	0	0	0	0	0	0	0	0	1	0	0	0	0	0	0	0	0	0	1
RAB7L1	0	0	0	0	0	0	0	0	0	0	0	0	0	0	0	0	0	0	1	0	0	0	0	0	0	0	0	0	1
CDKN2D	0	0	0	0	0	0	0	0	0	0	0	0	0	0	0	0	0	0	1	0	0	0	0	0	0	0	0	0	1
GPR155	0	0	0	0	0	0	0	0	0	0	0	0	0	0	0	0	0	0	1	0	0	0	0	0	0	0	0	0	1
STK38	0	0	0	0	0	0	0	0	0	0	0	0	0	0	0	0	0	0	1	0	0	0	0	0	0	0	0	0	1
ADD3	0	0	0	0	0	0	0	0	0	0	0	0	0	0	0	0	0	0	1	0	0	0	0	0	0	0	0	0	1
UBE2F	0	0	0	0	0	0	0	0	0	0	0	0	0	0	0	0	0	0	1	0	0	0	0	0	0	0	0	0	1
BIN1	0	0	0	0	0	0	0	0	0	0	0	0	0	0	0	0	0	0	1	0	0	0	0	0	0	0	0	0	1
ISG20	0	0	0	0	0	0	0	0	0	0	0	0	0	0	0	0	0	0	1	0	0	0	0	0	0	0	0	0	1
RAP2B	0	0	0	0	0	0	0	0	0	0	0	0	0	0	0	0	0	0	1	0	0	0	0	0	0	0	0	0	1
SAMD3	0	0	0	0	0	0	0	0	0	0	0	0	0	0	0	0	0	0	1	0	0	0	0	0	0	0	0	0	1
FAIM3	0	0	0	0	0	0	0	0	0	0	0	0	0	0	0	0	0	0	1	0	0	0	0	0	0	0	0	0	1
GIMAP4	0	0	0	0	0	0	0	0	0	0	0	0	0	0	0	0	0	0	1	0	0	0	0	0	0	0	0	0	1
TRADD	0	0	0	0	0	0	0	0	0	0	0	0	0	0	0	0	0	0	1	0	0	0	0	0	0	0	0	0	1
TNFAIP3	0	0	0	0	0	0	0	0	0	0	0	0	0	0	0	0	0	0	1	0	0	0	0	0	0	0	0	0	1
CTD-3184A7.4	0	0	0	0	0	0	0	0	0	0	0	0	0	0	0	0	0	0	1	0	0	0	0	0	0	0	0	0	1
CYTH1	0	0	0	0	0	0	0	0	0	0	0	0	0	0	0	0	0	0	1	0	0	0	0	0	0	0	0	0	1
PPP2R5C	0	0	0	0	0	0	0	0	0	0	0	0	0	0	0	0	0	0	1	0	0	0	0	0	0	0	0	0	1
CDC42SE1	0	0	0	0	0	0	0	0	0	0	0	0	0	0	0	0	0	0	1	0	0	0	0	0	0	0	0	0	1
YWHAQ	0	0	0	0	0	0	0	0	0	0	0	0	0	0	0	0	0	0	1	0	0	0	0	0	0	0	0	0	1
GIMAP1	0	0	0	0	0	0	0	0	0	0	0	0	0	0	0	0	0	0	1	0	0	0	0	0	0	0	0	0	1
DSTN	0	0	0	0	0	0	0	0	0	0	0	0	0	0	0	0	0	0	1	0	0	0	0	0	0	0	0	0	1
C16orf54	0	0	0	0	0	0	0	0	0	0	0	0	0	0	0	0	0	0	1	0	0	0	0	0	0	0	0	0	1
SULT1C2	0	0	0	0	0	0	0	0	0	0	0	0	0	0	0	0	0	0	0	0	0	0	0	0	0	1	0	0	1
EGFL6	0	0	0	0	0	0	0	0	0	0	0	0	0	0	0	0	0	0	0	0	0	0	0	0	0	1	0	0	1
BLNK	0	0	0	0	0	0	0	0	0	0	0	0	0	0	0	0	0	0	0	0	0	0	0	0	0	1	0	0	1
PPFIBP2	0	0	0	0	0	0	0	0	0	0	0	0	0	0	0	0	0	0	0	0	0	0	0	0	0	1	0	0	1
HES1	0	0	0	0	0	0	0	0	0	0	0	0	0	0	0	0	0	0	0	0	0	0	0	0	0	1	0	0	1
THBS4	0	0	0	0	0	0	0	0	0	0	0	0	0	0	0	0	0	0	0	0	0	0	0	0	0	1	0	0	1
CPA3	0	0	0	0	0	0	0	0	0	0	0	0	0	0	0	0	0	0	0	0	0	0	0	0	0	1	0	0	1
NEFL	0	0	0	0	0	0	0	0	0	0	0	0	0	0	0	0	0	0	0	0	0	0	0	0	0	1	0	0	1
VWF	0	0	0	0	0	0	0	0	0	0	0	0	0	0	0	0	0	0	0	0	0	0	0	0	0	1	0	0	1
LRP8	0	0	0	0	0	0	0	0	0	0	0	0	0	0	0	0	0	0	0	0	0	0	0	0	0	1	0	0	1
PDGFD	0	0	0	0	0	0	0	0	0	0	0	0	0	0	0	0	0	0	0	0	0	0	0	0	0	1	0	0	1
GABARAPL1	0	0	0	0	0	0	0	0	0	0	0	0	0	0	0	0	0	0	0	0	0	1	0	0	0	0	0	0	1
CASP9	0	0	0	0	0	0	0	0	0	0	0	0	0	0	0	0	0	0	0	0	0	0	1	0	0	0	0	0	1
MIR4435-1HG	0	0	0	0	0	0	0	0	0	0	0	0	0	0	0	0	0	0	0	0	0	0	0	0	0	0	0	1	1
RGS1	0	0	0	0	0	0	0	0	0	0	0	0	0	0	0	0	0	0	0	0	0	0	0	0	0	0	0	1	1
UBC	0	0	0	0	0	0	0	0	0	0	0	0	0	0	0	0	0	0	0	0	0	0	0	0	0	0	0	1	1
UGP2	0	0	0	0	0	0	0	0	0	0	0	0	0	0	0	0	0	0	0	0	0	0	0	0	0	0	0	1	1
BACE2	0	0	0	0	0	0	0	0	0	0	0	0	0	0	0	0	0	0	0	1	0	0	0	0	0	0	0	0	1
ITGA7	0	0	0	0	0	0	0	0	0	0	0	0	0	0	0	0	0	0	0	1	0	0	0	0	0	0	0	0	1
TNFSF11	0	0	0	0	0	0	0	0	0	0	0	0	0	0	0	0	0	0	0	1	0	0	0	0	0	0	0	0	1
BMP7	0	0	0	0	0	0	0	0	0	0	0	0	0	0	0	0	0	0	0	1	0	0	0	0	0	0	0	0	1
GCAT	0	0	0	0	0	0	0	0	0	0	0	0	0	0	0	0	0	0	0	1	0	0	0	0	0	0	0	0	1
TNC	0	0	0	0	0	0	0	0	0	0	0	0	0	0	0	0	0	0	0	1	0	0	0	0	0	0	0	0	1
SERPINA9	0	0	0	0	0	0	0	0	0	0	0	0	0	0	0	0	0	0	0	1	0	0	0	0	0	0	0	0	1
SLC43A1	0	0	0	0	0	0	0	0	0	0	0	0	0	0	0	0	0	0	0	1	0	0	0	0	0	0	0	0	1
WNT3	0	0	0	0	0	0	0	0	0	0	0	0	0	0	0	0	0	0	0	1	0	0	0	0	0	0	0	0	1
TUBA8	0	0	0	0	0	0	0	0	0	0	0	0	0	0	0	0	0	0	0	1	0	0	0	0	0	0	0	0	1
WNT1	0	0	0	0	0	0	0	0	0	0	0	0	0	0	0	0	0	0	0	1	0	0	0	0	0	0	0	0	1
SHANK1	0	0	0	0	0	0	0	0	0	0	0	0	0	0	0	0	0	0	0	1	0	0	0	0	0	0	0	0	1
OAF	0	0	0	0	0	0	0	0	0	0	0	0	0	0	0	0	0	0	0	1	0	0	0	0	0	0	0	0	1
MORN4	0	0	0	0	0	0	0	0	0	0	0	0	0	0	0	0	0	0	0	1	0	0	0	0	0	0	0	0	1
SCMH1	0	0	0	0	0	0	0	0	0	0	0	0	0	0	0	0	0	0	0	1	0	0	0	0	0	0	0	0	1
PAQR8	0	0	0	0	0	0	0	0	0	0	0	0	0	0	0	0	0	0	0	1	0	0	0	0	0	0	0	0	1
KIT	0	0	0	0	0	0	0	0	0	0	0	0	0	0	0	0	0	0	0	1	0	0	0	0	0	0	0	0	1
BC048355	0	0	0	0	0	0	0	0	0	0	0	0	0	0	0	0	0	0	0	1	0	0	0	0	0	0	0	0	1
4930583H14RIK	0	0	0	0	0	0	0	0	0	0	0	0	0	0	0	0	0	0	0	1	0	0	0	0	0	0	0	0	1
TWIST2	0	0	0	0	0	0	0	0	0	0	0	0	0	0	0	0	0	0	0	1	0	0	0	0	0	0	0	0	1
SLC12A8	0	0	0	0	0	0	0	0	0	0	0	0	0	0	0	0	0	0	0	1	0	0	0	0	0	0	0	0	1
HSD3B7	0	0	0	0	0	0	0	0	0	0	0	0	0	0	0	0	0	0	0	1	0	0	0	0	0	0	0	0	1
1700019D03RIK	0	0	0	0	0	0	0	0	0	0	0	0	0	0	0	0	0	0	0	1	0	0	0	0	0	0	0	0	1
H2-OB	0	0	0	0	0	0	0	0	0	0	0	0	0	0	0	0	0	0	0	1	0	0	0	0	0	0	0	0	1
ROPN1L	0	0	0	0	0	0	0	0	0	0	0	0	0	0	0	0	0	0	0	1	0	0	0	0	0	0	0	0	1
FCRL1	0	0	0	0	0	0	0	0	0	0	0	0	0	0	0	0	0	0	0	1	0	0	0	0	0	0	0	0	1
MMP10	0	0	0	0	0	0	0	0	0	0	0	0	0	0	0	0	0	0	0	1	0	0	0	0	0	0	0	0	1
FAM190A	0	0	0	0	0	0	0	0	0	0	0	0	0	0	0	0	0	0	0	1	0	0	0	0	0	0	0	0	1
DYNC2LI1	0	0	0	0	0	0	0	0	0	0	0	0	0	0	0	0	0	0	0	1	0	0	0	0	0	0	0	0	1
DPYSL5	0	0	0	0	0	0	0	0	0	0	0	0	0	0	0	0	0	0	0	1	0	0	0	0	0	0	0	0	1
AICDA	0	0	0	0	0	0	0	0	0	0	0	0	0	0	0	0	0	0	0	1	0	0	0	0	0	0	0	0	1
CCSER1	0	0	0	0	0	0	0	0	0	0	0	0	0	0	0	0	0	0	0	1	0	0	0	0	0	0	0	0	1
IGKC	0	0	0	0	0	0	0	0	0	0	0	0	0	0	0	0	0	0	0	0	1	0	0	0	0	0	0	0	1
AVIL	0	0	0	0	0	0	0	0	0	0	0	0	0	0	0	0	0	0	0	0	1	0	0	0	0	0	0	0	1
KLRB1C	0	0	0	0	0	0	0	0	0	0	0	0	0	0	0	0	0	0	0	0	1	0	0	0	0	0	0	0	1
MEGF11	0	0	0	0	0	0	0	0	0	0	0	0	0	0	0	0	0	0	0	0	1	0	0	0	0	0	0	0	1
SCD1	0	0	0	0	0	0	0	0	0	0	0	0	0	0	0	0	0	0	0	0	1	0	0	0	0	0	0	0	1
RP23-284K1.6	0	0	0	0	0	0	0	0	0	0	0	0	0	0	0	0	0	0	0	0	1	0	0	0	0	0	0	0	1
PIF1	0	0	0	0	0	0	0	0	0	0	0	0	0	0	0	0	0	0	0	0	1	0	0	0	0	0	0	0	1
TMEM163	0	0	0	0	0	0	0	0	0	0	0	0	0	0	0	0	0	0	0	0	1	0	0	0	0	0	0	0	1
NR2F6	0	0	0	0	0	0	0	0	0	0	0	0	0	0	0	0	0	0	0	0	1	0	0	0	0	0	0	0	1
SERPINB6B	0	0	0	0	0	0	0	0	0	0	0	0	0	0	0	0	0	0	0	0	1	0	0	0	0	0	0	0	1
FGR	0	0	0	0	0	0	0	0	0	0	0	0	0	0	0	0	0	0	0	0	1	0	0	0	0	0	0	0	1
LRRK1	0	0	0	0	0	0	0	0	0	0	0	0	0	0	0	0	0	0	0	0	1	0	0	0	0	0	0	0	1
SUV39H2	0	0	0	0	0	0	0	0	0	0	0	0	0	0	0	0	0	0	0	0	1	0	0	0	0	0	0	0	1
ESM1	0	0	0	0	0	0	0	0	0	0	0	0	0	0	0	0	0	0	0	0	1	0	0	0	0	0	0	0	1
CENPE	0	0	0	0	0	0	0	0	0	0	0	0	0	0	0	0	0	0	0	0	1	0	0	0	0	0	0	0	1
CCR2	0	0	0	0	0	0	0	0	0	0	0	0	0	0	0	0	0	0	0	0	1	0	0	0	0	0	0	0	1
KLRC1	0	0	0	0	0	0	0	0	0	0	0	0	0	0	0	0	0	0	0	0	1	0	0	0	0	0	0	0	1
NT5DC2	0	0	0	0	0	0	0	0	0	0	0	0	0	0	0	0	0	0	0	0	1	0	0	0	0	0	0	0	1
CD244	0	0	0	0	0	0	0	0	0	0	0	0	0	0	0	0	0	0	0	0	1	0	0	0	0	0	0	0	1
FAM20A	0	0	0	0	0	0	0	0	0	0	0	0	0	0	0	0	0	0	0	0	1	0	0	0	0	0	0	0	1
ZDHHC2	0	0	0	0	0	0	0	0	0	0	0	0	0	0	0	0	0	0	0	0	1	0	0	0	0	0	0	0	1
UBASH3B	0	0	0	0	0	0	0	0	0	0	0	0	0	0	0	0	0	0	0	0	1	0	0	0	0	0	0	0	1
SAPCD2	0	0	0	0	0	0	0	0	0	0	0	0	0	0	0	0	0	0	0	0	1	0	0	0	0	0	0	0	1
SCD2	0	0	0	0	0	0	0	0	0	0	0	0	0	0	0	0	0	0	0	0	1	0	0	0	0	0	0	0	1
KIF20B	0	0	0	0	0	0	0	0	0	0	0	0	0	0	0	0	0	0	0	0	1	0	0	0	0	0	0	0	1
CCR5	0	0	0	0	0	0	0	0	0	0	0	0	0	0	0	0	0	0	0	0	1	0	0	0	0	0	0	0	1
ACSL3	0	0	0	0	0	0	0	0	0	0	0	0	0	0	0	0	0	0	0	0	1	0	0	0	0	0	0	0	1
WEE1	0	0	0	0	0	0	0	0	0	0	0	0	0	0	0	0	0	0	0	0	1	0	0	0	0	0	0	0	1
SH2D5	0	0	0	0	0	0	0	0	0	0	0	0	0	0	0	0	0	0	0	0	1	0	0	0	0	0	0	0	1
EOMES	0	0	0	0	0	0	0	0	0	0	0	0	0	0	0	0	0	0	0	0	1	0	0	0	0	0	0	0	1
PAK6	0	0	0	0	0	0	0	0	0	0	0	0	0	0	0	0	0	0	0	0	1	0	0	0	0	0	0	0	1
AHR	0	0	0	0	0	0	0	0	0	0	0	0	0	0	0	0	0	0	0	0	1	0	0	0	0	0	0	0	1
ARSB	0	0	0	0	0	0	0	0	0	0	0	0	0	0	0	0	0	0	0	0	1	0	0	0	0	0	0	0	1
KLRK1	0	0	0	0	0	0	0	0	0	0	0	0	0	0	0	0	0	0	0	0	1	0	0	0	0	0	0	0	1
IL10	0	0	0	0	0	0	0	0	0	0	0	0	0	0	0	0	0	0	0	0	1	0	0	0	0	0	0	0	1
CKAP5	0	0	0	0	0	0	0	0	0	0	0	0	0	0	0	0	0	0	0	0	1	0	0	0	0	0	0	0	1
ALYREF	0	0	0	0	0	0	0	0	0	0	0	0	0	0	0	0	0	0	0	0	1	0	0	0	0	0	0	0	1
GEN1	0	0	0	0	0	0	0	0	0	0	0	0	0	0	0	0	0	0	0	0	1	0	0	0	0	0	0	0	1
IL24	0	0	0	0	0	0	0	0	0	0	0	0	0	0	0	0	0	0	0	0	1	0	0	0	0	0	0	0	1
ECT2	0	0	0	0	0	0	0	0	0	0	0	0	0	0	0	0	0	0	0	0	1	0	0	0	0	0	0	0	1
GTF2IRD1	0	0	0	0	0	0	0	0	0	0	0	0	0	0	0	0	0	0	0	0	1	0	0	0	0	0	0	0	1
GZMA	0	0	0	0	0	0	0	0	0	0	0	0	0	0	0	0	0	0	0	0	1	0	0	0	0	0	0	0	1
SCD	0	0	0	0	0	0	0	0	0	0	0	0	0	0	0	0	0	0	0	0	1	0	0	0	0	0	0	0	1
SERPINB6	0	0	0	0	0	0	0	0	0	0	0	0	0	0	0	0	0	0	0	0	1	0	0	0	0	0	0	0	1
RDH10	0	0	0	0	0	0	0	0	0	0	0	0	0	0	0	0	0	0	0	0	0	0	0	0	0	0	1	0	1
AFAP1L2	0	0	0	0	0	0	0	0	0	0	0	0	0	0	0	0	0	0	0	0	0	0	0	0	0	0	1	0	1
TNS3	0	0	0	0	0	0	0	0	0	0	0	0	0	0	0	0	0	0	0	0	0	0	0	0	0	0	1	0	1
TNFSF4	0	0	0	0	0	0	0	0	0	0	0	0	0	0	0	0	0	0	0	0	0	0	0	0	0	0	1	0	1
AKAP5	0	0	0	0	0	0	0	0	0	0	0	0	0	0	0	0	0	0	0	0	0	0	0	0	0	0	1	0	1
SLC2A8	0	0	0	0	0	0	0	0	0	0	0	0	0	0	0	0	0	0	0	0	0	0	0	0	0	0	1	0	1
AC243829.4	0	0	0	0	0	0	0	0	0	0	0	0	0	0	0	0	0	0	0	0	0	0	0	0	0	0	1	0	1
ZBED2	0	0	0	0	0	0	0	0	0	0	0	0	0	0	0	0	0	0	0	0	0	0	0	0	0	0	1	0	1
MCM5	0	0	0	0	0	0	0	0	0	0	0	0	0	0	0	0	0	0	0	0	0	0	0	0	0	0	1	0	1
CAV1	0	0	0	0	0	0	0	0	0	0	0	0	0	0	0	0	0	0	0	0	0	0	0	0	0	0	1	0	1
GOLIM4	0	0	0	0	0	0	0	0	0	0	0	0	0	0	0	0	0	0	0	0	0	0	0	0	0	0	1	0	1
VCAM1	0	0	0	0	0	0	0	0	0	0	0	0	0	0	0	0	0	0	0	0	0	0	0	0	0	0	1	0	1
PON2	0	0	0	0	0	0	0	0	0	0	0	0	0	0	0	0	0	0	0	0	0	0	0	0	0	0	1	0	1
MTSS1	0	0	0	0	0	0	0	0	0	0	0	0	0	0	0	0	0	0	0	0	0	0	0	0	0	0	1	0	1
MS4A6A	0	0	0	0	0	0	0	0	0	0	0	0	0	0	0	0	0	0	0	0	0	0	0	0	0	0	1	0	1
FXYD2	0	0	0	0	0	0	0	0	0	0	0	0	0	0	0	0	0	0	0	0	0	0	0	0	0	0	1	0	1
PLPP1	0	0	0	0	0	0	0	0	0	0	0	0	0	0	0	0	0	0	0	0	0	0	0	0	0	0	1	0	1
MYL6B	0	0	0	0	0	0	0	0	0	0	0	0	0	0	0	0	0	0	0	0	0	0	0	0	0	0	1	0	1
LAG3	0	0	0	0	0	0	0	0	0	0	0	0	0	0	0	0	0	0	0	0	0	0	0	0	0	0	1	0	1
CCDC50	0	0	0	0	0	0	0	0	0	0	0	0	0	0	0	0	0	0	0	0	0	0	0	0	0	0	1	0	1
KIAA1324	0	0	0	0	0	0	0	0	0	0	0	0	0	0	0	0	0	0	0	0	0	0	0	0	0	0	1	0	1
CDKN2A	0	0	0	0	0	0	0	0	0	0	0	0	0	0	0	0	0	0	0	0	0	0	0	0	0	0	1	0	1
ABHD6	0	0	0	0	0	0	0	0	0	0	0	0	0	0	0	0	0	0	0	0	0	0	0	0	0	0	1	0	1
GEM	0	0	0	0	0	0	0	0	0	0	0	0	0	0	0	0	0	0	0	0	0	0	0	0	0	0	1	0	1
HOPX	0	0	0	0	0	0	0	0	0	0	0	0	0	0	0	0	0	0	0	0	0	0	0	0	0	0	1	0	1
SNAP47	0	0	0	0	0	0	0	0	0	0	0	0	0	0	0	0	0	0	0	0	0	0	0	0	0	0	1	0	1
SIT1	0	0	0	0	0	0	0	0	0	0	0	0	0	0	0	0	0	0	0	0	0	0	0	0	0	0	1	0	1
PYCARD	0	0	0	0	0	0	0	0	0	0	0	0	0	0	0	0	0	0	0	0	0	0	0	0	0	0	1	0	1
ADGRG1	0	0	0	0	0	0	0	0	0	0	0	0	0	0	0	0	0	0	0	0	0	0	0	0	0	0	1	0	1
PTMS	0	0	0	0	0	0	0	0	0	0	0	0	0	0	0	0	0	0	0	0	0	0	0	0	0	0	1	0	1
HIPK2	0	0	0	0	0	0	0	0	0	0	0	0	0	0	0	0	0	0	0	0	0	0	0	0	0	0	1	0	1
LSP1	0	0	0	0	0	0	0	0	0	0	0	0	0	0	0	0	0	0	0	0	0	0	0	0	0	0	1	0	1
FAM3C	0	0	0	0	0	0	0	0	0	0	0	0	0	0	0	0	0	0	0	0	0	0	0	0	0	0	1	0	1
SLC1A4	0	0	0	0	0	0	0	0	0	0	0	0	0	0	0	0	0	0	0	0	0	0	0	0	0	0	1	0	1
NUDT1	0	0	0	0	0	0	0	0	0	0	0	0	0	0	0	0	0	0	0	0	0	0	0	0	0	0	1	0	1
HMGN2	0	0	0	0	0	0	0	0	0	0	0	0	0	0	0	0	0	0	0	0	0	0	0	0	0	0	1	0	1
HIST1H1B	0	0	0	0	0	0	0	0	0	0	0	0	0	0	0	0	0	0	0	0	0	0	0	0	0	0	1	0	1
HIST1H1E	0	0	0	0	0	0	0	0	0	0	0	0	0	0	0	0	0	0	0	0	0	0	0	0	0	0	1	0	1
HMGB1	0	0	0	0	0	0	0	0	0	0	0	0	0	0	0	0	0	0	0	0	0	0	0	0	0	0	1	0	1
HIST1H1D	0	0	0	0	0	0	0	0	0	0	0	0	0	0	0	0	0	0	0	0	0	0	0	0	0	0	1	0	1
H2AFZ	0	0	0	0	0	0	0	0	0	0	0	0	0	0	0	0	0	0	0	0	0	0	0	0	0	0	1	0	1
KIF22	0	0	0	0	0	0	0	0	0	0	0	0	0	0	0	0	0	0	0	0	0	0	0	0	0	0	1	0	1
HMGB2	0	0	0	0	0	0	0	0	0	0	0	0	0	0	0	0	0	0	0	0	0	0	0	0	0	0	1	0	1
H2AFV	0	0	0	0	0	0	0	0	0	0	0	0	0	0	0	0	0	0	0	0	0	0	0	0	0	0	1	0	1
CDT1	0	0	0	0	0	0	0	0	0	0	0	0	0	0	0	0	0	0	0	0	0	0	0	0	0	0	1	0	1
DUT	0	0	0	0	0	0	0	0	0	0	0	0	0	0	0	0	0	0	0	0	0	0	0	0	0	0	1	0	1
ANP32B	0	0	0	0	0	0	0	0	0	0	0	0	0	0	0	0	0	0	0	0	0	0	0	0	0	0	1	0	1
SMC4	0	0	0	0	0	0	0	0	0	0	0	0	0	0	0	0	0	0	0	0	0	0	0	0	0	0	1	0	1
CENPM	0	0	0	0	0	0	0	0	0	0	0	0	0	0	0	0	0	0	0	0	0	0	0	0	0	0	1	0	1
MAD2L1	0	0	0	0	0	0	0	0	0	0	0	0	0	0	0	0	0	0	0	0	0	0	0	0	0	0	1	0	1
DNAJC9	0	0	0	0	0	0	0	0	0	0	0	0	0	0	0	0	0	0	0	0	0	0	0	0	0	0	1	0	1
CCNA2	0	0	0	0	0	0	0	0	0	0	0	0	0	0	0	0	0	0	0	0	0	0	0	0	0	0	1	0	1
TMEM106C	0	0	0	0	0	0	0	0	0	0	0	0	0	0	0	0	0	0	0	0	0	0	0	0	0	0	1	0	1
CENPN	0	0	0	0	0	0	0	0	0	0	0	0	0	0	0	0	0	0	0	0	0	0	0	0	0	0	1	0	1
HIST2H2AC	0	0	0	0	0	0	0	0	0	0	0	0	0	0	0	0	0	0	0	0	0	0	0	0	0	0	1	0	1
ANXA2	0	0	0	0	0	0	0	0	0	0	0	0	0	0	0	0	0	0	0	0	0	1	0	0	0	0	0	0	1
S100A10	0	0	0	0	0	0	0	0	0	0	0	0	0	0	0	0	0	0	0	0	0	1	0	0	0	0	0	0	1
RPS29	0	0	0	0	0	0	0	0	0	0	0	0	0	0	0	0	0	0	0	0	0	1	0	0	0	0	0	0	1
RPS27	0	0	0	0	0	0	0	0	0	0	0	0	0	0	0	0	0	0	0	0	0	1	0	0	0	0	0	0	1
RPL36A	0	0	0	0	0	0	0	0	0	0	0	0	0	0	0	0	0	0	0	0	0	1	0	0	0	0	0	0	1
MARCKSL1	0	0	0	0	0	0	0	0	0	0	0	0	0	0	0	0	0	0	0	0	0	1	0	0	0	0	0	0	1
EEF1G	0	0	0	0	0	0	0	0	0	0	0	0	0	0	0	0	0	0	0	0	0	1	0	0	0	0	0	0	1
SYPL1	0	0	0	0	0	0	0	0	0	0	0	0	0	0	0	0	0	0	0	0	0	1	0	0	0	0	0	0	1
HMGA1	0	0	0	0	0	0	0	0	0	0	0	0	0	0	0	0	0	0	0	0	0	1	0	0	0	0	0	0	1
GCLM	0	0	0	0	0	0	0	0	0	0	0	0	0	0	0	0	0	0	0	0	0	1	0	0	0	0	0	0	1
TSPAN2	0	0	0	0	0	0	0	0	0	0	0	0	0	0	0	0	0	0	0	0	0	1	0	0	0	0	0	0	1
RARA	0	0	0	0	0	0	0	0	0	0	0	0	0	0	0	0	0	0	0	0	0	1	0	0	0	0	0	0	1
PERP	0	0	0	0	0	0	0	0	0	0	0	0	0	0	0	0	0	0	0	0	0	1	0	0	0	0	0	0	1
TES	0	0	0	0	0	0	0	0	0	0	0	0	0	0	0	0	0	0	0	0	0	1	0	0	0	0	0	0	1
RPS10	0	0	0	0	0	0	0	0	0	0	0	0	0	0	0	0	0	0	0	0	0	1	0	0	0	0	0	0	1
KDSR	0	0	0	0	0	0	0	0	0	0	0	0	0	0	0	0	0	0	0	0	0	1	0	0	0	0	0	0	1
CRIP2	0	0	0	0	0	0	0	0	0	0	0	0	0	0	0	0	0	0	0	0	0	1	0	0	0	0	0	0	1
C1orf21	0	0	0	0	0	0	0	0	0	0	0	0	0	0	0	0	0	0	0	0	0	1	0	0	0	0	0	0	1
ANTXR2	0	0	0	0	0	0	0	0	0	0	0	0	0	0	0	0	0	0	0	0	0	1	0	0	0	0	0	0	1
GSTM3	0	0	0	0	0	0	0	0	0	0	0	0	0	0	0	0	0	0	0	0	0	1	0	0	0	0	0	0	1
EPHA4	0	0	0	0	0	0	0	0	0	0	0	0	0	0	0	0	0	0	0	0	0	1	0	0	0	0	0	0	1
OGDH	0	0	0	0	0	0	0	0	0	0	0	0	0	0	0	0	0	0	0	0	0	1	0	0	0	0	0	0	1
CAMK1D	0	0	0	0	0	0	0	0	0	0	0	0	0	0	0	0	0	0	0	0	0	1	0	0	0	0	0	0	1
TRMT6	0	0	0	0	0	0	0	0	0	0	0	0	0	0	0	0	0	0	0	0	0	1	0	0	0	0	0	0	1
ANKH	0	0	0	0	0	0	0	0	0	0	0	0	0	0	0	0	0	0	0	0	0	1	0	0	0	0	0	0	1
GPR132	0	0	0	0	0	0	0	0	0	0	0	0	0	0	0	0	0	0	0	0	0	1	0	0	0	0	0	0	1
AUTS2	0	0	0	0	0	0	0	0	0	0	0	0	0	0	0	0	0	0	0	0	0	1	0	0	0	0	0	0	1
CD300A	0	0	0	0	0	0	0	0	0	0	0	0	0	0	0	0	0	0	0	0	0	1	0	0	0	0	0	0	1
BNIP3	0	0	0	0	0	0	0	0	0	0	0	0	0	0	0	0	0	0	0	0	0	1	0	0	0	0	0	0	1
AP1S2	0	0	0	0	0	0	0	0	0	0	0	0	0	0	0	0	0	0	0	0	0	1	0	0	0	0	0	0	1
BMI1	0	0	0	0	0	0	0	0	0	0	0	0	0	0	0	0	0	0	0	0	0	1	0	0	0	0	0	0	1
PRKCI	0	0	0	0	0	0	0	0	0	0	0	0	0	0	0	0	0	0	0	0	0	1	0	0	0	0	0	0	1
CASP4	0	0	0	0	0	0	0	0	0	0	0	0	0	0	0	0	0	0	0	0	0	0	1	0	0	0	0	0	1
NOD2	0	0	0	0	0	0	0	0	0	0	0	0	0	0	0	0	0	0	0	0	0	0	1	0	0	0	0	0	1
ACKR3	0	0	0	0	0	0	0	0	0	0	0	0	0	0	0	0	0	0	0	0	0	0	0	0	1	0	0	0	1
FZD2	0	0	0	0	0	0	0	0	0	0	0	0	0	0	0	0	0	0	0	0	0	0	0	0	1	0	0	0	1
ARRDC2	0	0	0	0	0	0	0	0	0	0	0	0	0	0	0	0	0	0	0	0	0	0	0	1	0	0	0	0	1
ADTRP	0	0	0	0	0	0	0	0	0	0	0	0	0	0	0	0	0	0	0	0	0	0	0	1	0	0	0	0	1
MAML2	0	0	0	0	0	0	0	0	0	0	0	0	0	0	0	0	0	0	0	0	0	0	0	1	0	0	0	0	1
BEX3	0	0	0	0	0	0	0	0	0	0	0	0	0	0	0	0	0	0	0	0	0	0	0	1	0	0	0	0	1
INPP4B	0	0	0	0	0	0	0	0	0	0	0	0	0	0	0	0	0	0	0	0	0	0	0	1	0	0	0	0	1
AC119396.1	0	0	0	0	0	0	0	0	0	0	0	0	0	0	0	0	0	0	0	0	0	0	0	1	0	0	0	0	1
LINC00402	0	0	0	0	0	0	0	0	0	0	0	0	0	0	0	0	0	0	0	0	0	0	0	1	0	0	0	0	1
CCR4	0	0	0	0	0	0	0	0	0	0	0	0	0	0	0	0	0	0	0	0	0	0	0	1	0	0	0	0	1
IL6R	0	0	0	0	0	0	0	0	0	0	0	0	0	0	0	0	0	0	0	0	0	0	0	1	0	0	0	0	1
RILPL2	0	0	0	0	0	0	0	0	0	0	0	0	0	0	0	0	0	0	0	0	0	0	0	1	0	0	0	0	1
LPAR6	0	0	0	0	0	0	0	0	0	0	0	0	0	0	0	0	0	0	0	0	0	0	0	1	0	0	0	0	1
WDR74	0	0	0	0	0	0	0	0	0	0	0	0	0	0	0	0	0	0	0	0	0	0	0	1	0	0	0	0	1
RIC3	0	0	0	0	0	0	0	0	0	0	0	0	0	0	0	0	0	0	0	0	0	0	0	1	0	0	0	0	1
CYSLTR1	0	0	0	0	0	0	0	0	0	0	0	0	0	0	0	0	0	0	0	0	0	0	0	1	0	0	0	0	1
ITGB1	0	0	0	0	0	0	0	0	0	0	0	0	0	0	0	0	0	0	0	0	0	0	0	1	0	0	0	0	1
CD5	0	0	0	0	0	0	0	0	0	0	0	0	0	0	0	0	0	0	0	0	0	0	0	1	0	0	0	0	1
PRKAA2	0	0	0	0	0	0	0	0	0	0	0	0	0	0	0	0	0	0	0	0	0	0	0	0	0	0	0	0	0
ATG12	0	0	0	0	0	0	0	0	0	0	0	0	0	0	0	0	0	0	0	0	0	0	0	0	0	0	0	0	0
ULK2	0	0	0	0	0	0	0	0	0	0	0	0	0	0	0	0	0	0	0	0	0	0	0	0	0	0	0	0	0
ATG5	0	0	0	0	0	0	0	0	0	0	0	0	0	0	0	0	0	0	0	0	0	0	0	0	0	0	0	0	0
PIK3CG	0	0	0	0	0	0	0	0	0	0	0	0	0	0	0	0	0	0	0	0	0	0	0	0	0	0	0	0	0
TNFRSF10D	0	0	0	0	0	0	0	0	0	0	0	0	0	0	0	0	0	0	0	0	0	0	0	0	0	0	0	0	0
FADD	0	0	0	0	0	0	0	0	0	0	0	0	0	0	0	0	0	0	0	0	0	0	0	0	0	0	0	0	0
BIRC3	0	0	0	0	0	0	0	0	0	0	0	0	0	0	0	0	0	0	0	0	0	0	0	0	0	0	0	0	0
FAS	0	0	0	0	0	0	0	0	0	0	0	0	0	0	0	0	0	0	0	0	0	0	0	0	0	0	0	0	0
DNM1L	0	0	0	0	0	0	0	0	0	0	0	0	0	0	0	0	0	0	0	0	0	0	0	0	0	0	0	0	0
GSDME	0	0	0	0	0	0	0	0	0	0	0	0	0	0	0	0	0	0	0	0	0	0	0	0	0	0	0	0	0
IPMK	0	0	0	0	0	0	0	0	0	0	0	0	0	0	0	0	0	0	0	0	0	0	0	0	0	0	0	0	0
MLKL	0	0	0	0	0	0	0	0	0	0	0	0	0	0	0	0	0	0	0	0	0	0	0	0	0	0	0	0	0
RBCK1	0	0	0	0	0	0	0	0	0	0	0	0	0	0	0	0	0	0	0	0	0	0	0	0	0	0	0	0	0
TICAM1	0	0	0	0	0	0	0	0	0	0	0	0	0	0	0	0	0	0	0	0	0	0	0	0	0	0	0	0	0

## Sheet: Supp T9
Signature	OS_Coef	OS_P	OS_q	PF_Coef	PF_P	PF_q	AIC
Zhang CD8 TCS	-0.446044	4.58582e-10	1.12353e-08	-0.570179	9.39697e-17	2.76271e-15	52436.1
Caushi.Stem-like memory	-0.329901	1.86015e-06	1.95316e-05	-0.392167	2.97521e-09	3.36427e-08	52470.6
Caushi.CD8.Stem-like memory	-0.247989	0.000728617	0.00357022	-0.312541	7.54529e-06	5.28171e-05	52485.9
Jansen_Stem like	-0.201198	0.000754528	0.00357792	-0.297069	1.4507e-07	1.42169e-06	52478.3
Caushi.CD4-Tfh(1)	-0.221799	0.00164084	0.00634745	-0.293717	1.32727e-05	8.48302e-05	52487
Mem_Eff_6_Feldman	-0.241561	7.67595e-07	9.40304e-06	-0.280213	1.69873e-09	2.08094e-08	52469.5
Caushi.CD4CD8(I)	-0.185111	0.000686669	0.0034807	-0.247812	1.75743e-06	1.43523e-05	52483.1
Caushi.CD8.CD4CD8(I)	-0.185111	0.000686669	0.0034807	-0.247812	1.75743e-06	1.43523e-05	52483.1
Oh.CD4.CXCL13	-0.144963	0.0324031	0.0766476	-0.236113	0.000281151	0.00114804	52492.9
Caushi.CD4-Th(1)	-0.146951	0.00915548	0.0253935	-0.233443	1.20573e-05	8.0565e-05	52486.8
Caushi.CD8.TRM(IV)	-0.191723	1.57488e-05	0.000143628	-0.219423	1.93389e-07	1.77676e-06	52478.9
Oh.CD4.CM	-0.141214	0.0416159	0.0910077	-0.216599	0.000942891	0.00315011	52495.1
Krishna.ACT.CD8.Stem.Like	-0.0972674	0.103135	0.183343	-0.208295	0.000223773	0.00096749	52492.4
Mel_Exhaust_Tirosh	-0.161684	0.00158097	0.00628114	-0.202792	3.11109e-05	0.000182932	52488.7
Caushi.CD4CD8(II)	-0.153665	0.00573449	0.0175619	-0.201139	0.000139178	0.000639348	52491.5
Caushi.CD8.CD4CD8(II)	-0.153665	0.00573449	0.0175619	-0.201139	0.000139178	0.000639348	52491.5
Caushi.MAIT	-0.0661401	0.335549	0.460989	-0.19636	0.00251005	0.00723485	52496.9
Tang_Ferroptosis	-0.33166	7.67113e-05	0.000490286	-0.193005	0.0147283	0.0267291	52500.2
B16_PROG.EX_Miller	-0.13183	0.0477892	0.0989437	-0.190954	0.00264573	0.00747926	52497
Wang_OS Benefit	-0.050211	0.421665	0.525295	-0.190492	0.00137663	0.00429295	52495.9
Caushi.CD4-Treg	-0.131558	0.0295394	0.0714212	-0.183595	0.00144668	0.00434005	52495.9
Caushi.CD8.TRM(VI)	-0.131525	0.0134614	0.0354446	-0.177954	0.000417054	0.00153267	52493.6
Yost_CD8_Memory	-0.124512	0.017458	0.0442469	-0.177698	0.000356237	0.00134274	52493.3
Lowery_NeoTCR8	-0.16758	0.00738027	0.0213106	-0.174659	0.0030214	0.00822493	52497.3
Oh.CD8.CM	-0.1164	0.10352	0.183343	-0.171765	0.0113038	0.0221554	52499.7
Caushi.CD8-Effector(3)	-0.124362	0.0135027	0.0354446	-0.171522	0.000305546	0.00118198	52493
LCMV_PROG.EX_Miller	-0.0748567	0.341391	0.464671	-0.170938	0.0230873	0.0397508	52500.9
Yost_CD8 Eff mem	-0.0785177	0.150954	0.243849	-0.163873	0.00140178	0.00429295	52495.9
Caushi.CD8-Effector(1)	-0.117079	0.0437439	0.0918622	-0.161849	0.00321062	0.00858112	52497.4
Grog.8KLRB1	-0.134717	0.00260396	0.00933615	-0.160157	0.00015772	0.000702571	52491.8
Caushi.CD8-TRM(2)	-0.115129	0.0278397	0.0693633	-0.159505	0.00124777	0.00407604	52495.7
Oh.CD4IL2RAHI	-0.112849	0.0625721	0.122641	-0.159174	0.00524381	0.0123573	52498.3
Mem_Eff_4_Feldman	-0.0566667	0.360539	0.480914	-0.156402	0.00743833	0.0156205	52498.9
Exhaust_3_Feldman	-0.135824	0.00085562	0.0039305	-0.150337	0.00010265	0.000538911	52491
Zheng_Exhau T Cell	-0.0867719	0.135241	0.220893	-0.149516	0.00679974	0.0149188	52498.8
Caushi.CD8-TRM(1)	-0.090635	0.0823204	0.155142	-0.147061	0.00279682	0.00775722	52497.1
Early.Act_5_Feldman	-0.0475335	0.442565	0.542143	-0.147021	0.0124864	0.0235321	52499.8
Caushi.CD8.Effector(III)	-0.069475	0.172424	0.272541	-0.1465	0.00231834	0.00681591	52496.8
Oliveira_TET	-0.0895533	0.115318	0.195631	-0.143684	0.00755103	0.0156338	52499
Shi_TCS	-0.072201	0.0984261	0.178625	-0.142923	0.000614368	0.00215029	52494.3
Chatani_TP	-0.15688	1.21564e-06	1.37461e-05	-0.14269	3.39371e-06	2.62566e-05	52484.5
Grog.8EM	-0.124069	0.000976747	0.004223	-0.141519	6.71637e-05	0.000365669	52490.2
Caushi.CD8-Effector(2)	-0.123712	0.00739349	0.0213106	-0.140377	0.00132063	0.00422027	52495.8
Grog.CD4.IL6ST	-0.110398	0.032849	0.0766476	-0.140073	0.00433761	0.0104529	52498
Li.CD8.DYS	-0.0974572	0.0584895	0.116189	-0.136677	0.00532585	0.0123573	52498.3
Guo_Exhau CD4	-0.100914	0.0551033	0.112503	-0.135207	0.00727062	0.0156205	52498.9
Oh.CD4.GZMK	-0.100368	0.0422347	0.0910077	-0.134477	0.00383353	0.00988648	52497.7
Grog.8Trm.2	-0.105542	0.00602649	0.0180795	-0.131803	0.000295562	0.00117426	52493
Oliveira_EMT	-0.033445	0.547352	0.63355	-0.130184	0.0129145	0.0240308	52499.9
Ghatalia_T Cell Inflation RCC	-0.125584	0.000106615	0.000626895	-0.129547	2.4664e-05	0.000151067	52488.3
Zou_Immune Rxn HCC	-0.103987	0.0380528	0.084754	-0.126566	0.00738223	0.0156205	52498.9
Novel_sig	-0.0724222	0.185991	0.284799	-0.126137	0.0147075	0.0267291	52500.1
Duhen_Tumor React CD8	-0.145095	0.000882142	6.2321e-05	-0.136457	6.82792e-06	4.01482e-05	52489.8
Hanada_Reactive T Cell NSCLC	-0.120306	0.00862991	0.0243961	-0.124905	0.0039457	0.0099206	52497.8
Oh.CD8.MAIT	-0.09507	0.0943964	0.173453	-0.124294	0.0212029	0.037105	52500.8
Chen_Recurrent Papillary Thyroid	-0.124847	0.000419003	0.00228124	-0.123056	0.000251788	0.00105751	52492.7
Oliveira_Tumor Spec_EM	-0.0526404	0.425844	0.526042	-0.122993	0.0484417	0.0751265	52502.2
Oh.CD8.Naive	-0.0659833	0.260199	0.374993	-0.122706	0.0275398	0.0460039	52501.2
Oliveira_Tumor Spec_Pro_Exhaust	-0.0784351	0.246291	0.365705	-0.120266	0.0605476	0.0897897	52502.6
Grog.8EFF	-0.0732549	0.056513	0.1138	-0.120057	0.000928578	0.00315011	52495.1
Caushi.CD8.MAIT	-0.0314035	0.639294	0.711941	-0.118251	0.0616923	0.0897897	52502.6
Yan_TCS	-0.0960444	0.00301844	0.0103189	-0.117362	0.000125447	0.000614693	52491.4
Yan_CD8 IFN Gamma	-0.0960444	0.00301844	0.0103189	-0.117362	0.000125447	0.000614693	52491.4
Caushi.CD8.TRM(II)	-0.0399695	0.459438	0.55816	-0.116245	0.023533	0.0397626	52501
Caushi.CD4-Th(2)	-0.0525565	0.310908	0.435271	-0.11337	0.0203745	0.036085	52500.7
Caushi.CD8.Effector(II)	-0.0967646	0.0296374	0.0714212	-0.111097	0.00835127	0.0170505	52499.1
CD8_G_Feldman	0.00424757	0.942551	0.949007	-0.110823	0.0485511	0.0751265	52502.2
Lowery_NeoTCR4	-0.112252	0.0358856	0.0824247	-0.108838	0.031942	0.0521719	52501.5
Caushi.CD4-Tfh(2)	-0.0196646	0.743813	0.798106	-0.108511	0.0574362	0.0861542	52502.5
Grog.8chrom	-0.0796094	0.107931	0.18888	-0.10833	0.0200992	0.0360315	52500.7
Yost_CD8 Exh	-0.042933	0.477783	0.571009	-0.10723	0.0614775	0.0897897	52502.6
Oh.CD4.TH17	-0.0375349	0.53921	0.63355	-0.106962	0.0651096	0.0938345	52502.7
Oh.CD8.CD39	-0.0571575	0.281785	0.398292	-0.105366	0.0356452	0.0575807	52501.7
Grog.8Trm.1	-0.0560179	0.206686	0.313226	-0.105016	0.0120599	0.0230235	52499.8
Oliveira_AAT	0.0168303	0.813362	0.85403	-0.101354	0.132194	0.170461	52503.8
Caushi.CD8.Effector(I)	-0.0181539	0.750723	0.799684	-0.0983667	0.070571	0.0997494	52502.8
CD3.MT	-0.0551491	0.166833	0.26657	-0.0969456	0.0100625	0.019989	52499.5
Grog.8Trm.3	-0.0590656	0.113125	0.195631	-0.0964062	0.00609418	0.0135734	52498.6
Oh.CD4.MITO	-0.105994	0.00344722	0.0115168	-0.0944608	0.00556012	0.0125744	52498.4
Oh.CD4.GZMB	-0.0448346	0.371949	0.488183	-0.0925466	0.0495495	0.0758726	52502.2
Yost_CD8 Act/Exh	-0.0624989	0.250814	0.366571	-0.0883562	0.0857696	0.118945	52503.1
Yuan_Hypoxia	-0.0394289	0.381028	0.491325	-0.0867338	0.0421195	0.0672996	52502
Feldman_CD8_G	0.0244024	0.675444	0.730076	-0.0865351	0.119377	0.156682	52503.7
Oh.CD8.XCL	-0.0711505	0.131874	0.217815	-0.0861447	0.052528	0.0796043	52502.3
Oh.CD8.MITO	-0.100735	0.00222703	0.00818433	-0.0779697	0.0120111	0.0230235	52499.8
Oh.CD4.Activate	0.0140703	0.798205	0.844145	-0.0723697	0.164125	0.206209	52504.2
Qi_TREG	-0.0681197	0.0371715	0.0840647	-0.0700779	0.0232556	0.0397508	52501
Liu_Treg	-0.0357856	0.475683	0.571009	-0.0695218	0.142647	0.182341	52504
LCMV_TERMN.EX_Miller	0.0657622	0.363139	0.480914	-0.0682089	0.314358	0.369686	52505.1
Grog.CD4.FOS	0.021708	0.631404	0.708522	-0.0670184	0.117068	0.155036	52503.6
Grog.Treg.1	-0.0419064	0.332453	0.460989	-0.0611255	0.130816	0.170177	52503.8
Oliveira_Tumor Spec_AAT	0.0101529	0.882773	0.894949	-0.0595728	0.36016	0.413621	52505.3
Oliveira_Pro_Exhaust	0.00490905	0.949712	0.949712	-0.0564253	0.446896	0.493938	52505.5
Oh.CD8.FGFBP2	0.0302772	0.596279	0.674254	-0.0552256	0.303625	0.359942	52505
Oliveira_Tumor Spec_TET	0.00873752	0.882239	0.894949	-0.0528532	0.341388	0.39515	52505.2
Caushi.CD8.TRM(V)	-0.0241265	0.66539	0.730076	-0.0517524	0.325865	0.380176	52505.1
Zheng_TREG	0.0128381	0.856469	0.892915	-0.0479809	0.476545	0.518905	52505.6
Caushi.CD8-MHCII	0.0250358	0.582983	0.66433	-0.0468969	0.275244	0.333226	52504.9
Guo_Exhau CD8	-0.023428	0.668474	0.730076	-0.0466332	0.3673	0.418551	52505.3
Yost_Naive	0.0491301	0.393906	0.499174	-0.0437925	0.421597	0.469506	52505.5
Oh.TIL_CD4.GZMK	-0.0643735	0.220532	0.330798	-0.0417265	0.400322	0.449216	52505.4
Oh.CD8.RPL	-0.0462838	0.183709	0.284266	-0.0357139	0.276555	0.333226	52504.9
Bao_MSI vs. MSS	-0.0237278	0.544995	0.63355	-0.0318117	0.392602	0.443943	52505.4
Oh.CD4IL2RALO	0.0241499	0.674872	0.730076	-0.0317962	0.558512	0.603685	52505.8
Yost_CD8 Activated	0.0796316	0.179015	0.279948	-0.0263388	0.63771	0.684258	52505.9
Grog.CD4.TCF7	-0.0315966	0.344871	0.465101	-0.0236037	0.45583	0.500053	52505.5
Zhang_CD8 Infiltration	-0.00900971	0.872795	0.894949	-0.0194112	0.714516	0.755639	52506
Exhaust_2_Feldman	0.0613599	0.385446	0.4927	-0.0183786	0.783483	0.811071	52506
Grog.CD4.RPL32	-0.0292661	0.376506	0.48979	-0.0120074	0.700807	0.746512	52506
Caushi.CD8.TRM(III)	0.056954	0.251862	0.366571	-0.00127208	0.978291	0.984992	52506.1
Guo_Supp Treg	0.0430509	0.515796	0.611468	-0.000946142	0.987962	0.987962	52506.1
Grog.Treg.2	0.0257044	0.556223	0.638787	0.00215048	0.958009	0.971223	52506.1
Oliveira_TM	0.136152	0.0692845	0.134011	0.00704416	0.920474	0.939651	52506.1
Li_Pyroptosis	0.0324168	0.400124	0.50272	0.011998	0.742956	0.774571	52506
CD8_B_Feldman	-0.00892362	0.867088	0.894949	0.0122992	0.807335	0.829917	52506
Caushi.CD8.TRM(I)	0.12041	0.0427179	0.0910077	0.0189301	0.735789	0.772578	52506
Oh.TIL_CD4.GZMB	0.078176	0.117222	0.195814	0.0488546	0.297169	0.355154	52505
Wang_Cytokine Exp	0.152294	5.84951e-05	0.000409465	0.0564024	0.114892	0.154685	52503.6
Oh.TIL_CD4IL2RALO	0.0824978	0.0911778	0.16966	0.0630726	0.169618	0.209529	52504.2
B16_TERMINAL.EX_Miller	0.180775	0.00423082	0.0138207	0.0683927	0.251502	0.30809	52504.8
Li_Immune Inf	0.149858	0.00536911	0.0171578	0.0698651	0.167831	0.209078	52504.2
Guo_Activated Treg	0.0987465	0.0806495	0.153967	0.0749907	0.160405	0.203271	52504.1
Hou_T Cell Prolif	0.206777	1.661e-05	0.000143628	0.0829429	0.0664133	0.094784	52502.7
Caushi.CD4-Th(3)	0.180327	0.00154561	0.00628114	0.0860035	0.107055	0.145713	52503.5
Oh.CD4.HSP	0.188964	0.00199539	0.00752108	0.0942394	0.103638	0.142381	52503.5
Oh.TIL_CD4IL2RAHI	0.113563	0.0168506	0.0434568	0.0961102	0.0310646	0.051309	52501.5
Yang_PD1Hi_Checkpoint	0.0590018	0.273153	0.38984	0.101635	0.0458437	0.0724627	52502.1
Grog.CD4.Trm	0.138966	0.000921673	0.00410563	0.102484	0.00922734	0.0185811	52499.3
Oh.CD8.HSP	0.2182	0.000318432	0.00180037	0.102747	0.0732229	0.102512	52502.9
Ahuluwalia_Prognostic Cell Death	0.276641	5.26738e-05	0.000407529	0.102853	0.115751	0.154685	52503.6
Dai_Activation CD4 CD8	0.174274	5.64129e-05	0.000409465	0.118171	0.00398174	0.0099206	52497.8
Wu_OS Pancreatic CA	0.208546	0.000100592	0.000616128	0.139655	0.00538005	0.0123573	52498.4
Yang_Cuproptosis	0.0853765	0.115782	0.195631	0.149216	0.0036967	0.00970385	52497.7
Mo_Hypoxia	0.227279	1.43543e-09	2.34453e-08	0.161529	6.18644e-06	4.54703e-05	52485.7
TOX_Scott	0.16715	0.0130556	0.0354446	0.181804	0.00428312	0.0104529	52497.9
Grog.8Mit	0.175067	7.62636e-05	0.000490286	0.221348	1.44265e-07	1.42169e-06	52478.4
Jansen_Term diff	0.268151	0.00114479	0.00480811	0.271372	0.000473838	0.00169888	52493.9
An_CervicalCA	0.351516	8.30637e-13	5.99802e-11	0.309289	1.73598e-11	2.83543e-10	52460.8
Exhaust_1_Feldman	0.262953	1.22409e-12	5.99802e-11	0.321811	3.70311e-20	1.81453e-18	52419.7
Oh.CD4.PROLIF	0.24836	8.22261e-10	1.72675e-08	0.329534	9.66426e-18	3.55162e-16	52431.3
Oh.CD8.PRO	0.260209	3.69707e-12	1.28697e-10	0.334843	3.53097e-21	5.19053e-19	52414.9
Oliveira_Prolif_T	0.267849	4.37746e-12	1.28697e-10	0.339312	1.93523e-20	1.4224e-18	52418.4
Oliveira_Tumor Spec_Prolif T	0.273775	4.99398e-06	4.8941e-05	0.351273	6.3406e-10	8.47335e-09	52467.7
Krishna.ACT.CD8.Term.Diff	0.286105	1.24298e-09	2.28397e-08	0.361208	4.55006e-16	1.11477e-14	52439.2
Caushi.CD8-Proliferating	0.308493	1.49184e-08	1.99364e-07	0.382855	9.7163e-14	1.78537e-12	52450.4
Liu_Hypoxia	0.483426	1.67299e-14	2.4593e-12	0.393935	5.8942e-11	8.66447e-10	52463.3
Caushi.CD8.Proliferating	0.317688	1.46023e-08	1.99364e-07	0.425356	1.00064e-15	2.10135e-14	52441.1

## Sheet: Supp T10
Tumor	Signature	OS_Coef	OS_P	PF_Coef	PF_P	AIC	OS_q	PF_q
Neural	Shi_TCS	-1.29137	0.0014568	-1.66787	9.21427e-06	560.528	0.104863	0.0013545
Neural	Liu_Treg	-0.620186	0.0733065	-0.929342	0.00206311	571.984	0.316943	0.0303277
Ecto	Oh.CD8.CM	-0.61975	0.0125879	-0.479975	0.0291857	3389.21	0.0162317	0.03405
Ecto	Oh.CD8.RPL	-0.502423	1.68422e-05	-0.432016	3.08619e-05	3376.62	7.07373e-05	9.07341e-05
Neural	Grog.8KLRB1	-0.463222	0.199045	-1.07823	0.00150845	571.451	0.406384	0.024638
Ecto	Grog.CD4.TCF7	-0.446285	5.30049e-05	-0.390818	8.50223e-05	3378.56	0.000165781	0.000186542
Ecto	Grog.8KLRB1	-0.431406	0.00398309	-0.358449	0.00745988	3386.81	0.00562994	0.00970444
Ecto	Grog.CD4.RPL32	-0.423321	0.000131366	-0.36593	0.000246488	3380.53	0.000316571	0.000458655
Ecto	Oh.CD8.MITO	-0.388187	0.000439767	-0.213661	0.0280192	3389.14	0.000885559	0.0329506
Neural	Zhang CD8 TCS	-0.271794	0.609997	-1.86608	0.000416667	568.58	0.761148	0.0102083
Neural	Oliveira_TM	-0.141805	0.819902	-1.76358	0.00252243	572.493	0.872697	0.0337088
Ecto	Mo_Hypoxia	-0.0830769	0.526686	-0.281006	0.0188967	3388.45	0.549098	0.0225839
Meso	Caushi.Stem-like memory	-0.692588	0.00341841	-0.992923	7.84168e-06	3920.42	0.0265042	3.50228e-05
Meso	Oh.CD4.CXCL13	-0.546674	0.0171507	-0.985993	5.71833e-06	3919.84	0.0434683	2.87334e-05
Meso	Jansen_Stem like	-0.583419	0.00432722	-0.970708	6.1432e-07	3915.23	0.0265042	1.10539e-05
Meso	Caushi.CD4-Th(1)	-0.558215	0.00413665	-0.922062	4.12041e-07	3914.38	0.0265042	1.10539e-05
Meso	Lowery_NeoTCR8	-0.582107	0.00494071	-0.919137	1.82101e-06	3917.35	0.0268994	1.77043e-05
Meso	Caushi.CD4CD8(II)	-0.559958	0.00391932	-0.906259	3.56349e-07	3914.19	0.0265042	1.10539e-05
Meso	Caushi.CD8.CD4CD8(II)	-0.559958	0.00391932	-0.906259	3.56349e-07	3914.19	0.0265042	1.10539e-05
Meso	Caushi.CD4-Tfh(1)	-0.552368	0.0224788	-0.899214	5.31298e-05	3924.3	0.0532966	0.000137019
Meso	Caushi.CD4-Treg	-0.522192	0.0134402	-0.887932	5.20251e-06	3919.62	0.0378344	2.73132e-05
Meso	Caushi.CD8.MAIT	-0.205244	0.374286	-0.887918	5.92572e-05	3924.47	0.465629	0.000147641
Meso	Exhaust_2_Feldman	-0.443705	0.0556235	-0.886568	5.84454e-05	3924.62	0.106023	0.000147641
Meso	Oliveira_Tumor Spec_EM	-0.505002	0.0236964	-0.88529	1.8036e-05	3922.13	0.0552916	6.02567e-05
Meso	Caushi.CD4-Tfh(2)	-0.462808	0.0274235	-0.877442	5.05163e-06	3919.59	0.0620192	2.73132e-05
Meso	Zheng_TREG	-0.306403	0.201179	-0.877176	0.000114689	3925.83	0.296157	0.000259374
Meso	Caushi.CD8.Stem-like memory	-0.610061	0.0182117	-0.864978	0.000343628	3927.92	0.0450417	0.000682613
Meso	Oliveira_Tumor Spec_Pro_Exhaust	-0.430503	0.0556028	-0.859938	4.13159e-05	3923.79	0.106023	0.000112471
Meso	Zhang CD8 TCS	-0.550189	0.0123397	-0.841253	0.000211591	3927.07	0.0355672	0.00044434
Meso	Yost_CD8 Exh	-0.5646	0.00610771	-0.83321	9.52013e-06	3920.88	0.0278512	3.88739e-05
Meso	Caushi.CD4CD8(I)	-0.507957	0.0068207	-0.823156	2.23169e-06	3917.92	0.0278512	1.77043e-05
Meso	Caushi.CD8.CD4CD8(I)	-0.507957	0.0068207	-0.823156	2.23169e-06	3917.92	0.0278512	1.77043e-05
Meso	Caushi.CD8.TRM(VI)	-0.591169	0.000924784	-0.815661	6.01655e-07	3915.27	0.0133343	1.10539e-05
Meso	Oliveira_EMT	-0.492572	0.0103598	-0.796353	7.86227e-06	3920.46	0.0336404	3.50228e-05
Meso	Mel_Exhaust_Tirosh	-0.514756	0.0025262	-0.784272	7.77358e-07	3915.74	0.0247568	1.10539e-05
Meso	Caushi.CD8.TRM(IV)	-0.544087	0.000230269	-0.783236	1.56074e-08	3907.89	0.00500397	2.29429e-06
Meso	Oh.CD4IL2RAHI	-0.320612	0.105668	-0.77668	1.85339e-05	3922.22	0.176513	6.05441e-05
Meso	Caushi.CD8-TRM(2)	-0.616867	0.00061009	-0.775455	2.52918e-06	3918.11	0.00996481	1.77043e-05
Meso	Oh.CD8.Naive	-0.561906	0.00462866	-0.758956	4.89402e-05	3924.19	0.0268994	0.000128468
Meso	Oh.CD4.GZMK	-0.632402	0.000238284	-0.757276	7.81576e-07	3915.92	0.00500397	1.10539e-05
Meso	Yost_CD8_Memory	-0.661377	0.000232999	-0.756836	5.86395e-06	3919.96	0.00500397	2.87334e-05
Meso	Caushi.CD8.TRM(II)	-0.488471	0.0098927	-0.754507	1.24384e-05	3921.39	0.033102	4.68833e-05
Meso	Oh.CD8.FGFBP2	-0.234297	0.214044	-0.753926	2.48991e-05	3922.77	0.308476	7.32033e-05
Meso	Mem_Eff_6_Feldman	-0.534563	0.00112965	-0.753808	1.10378e-06	3916.43	0.0138382	1.15897e-05
Meso	Caushi.CD4-Th(2)	-0.459	0.00892727	-0.752898	3.55706e-06	3918.79	0.0326848	2.27343e-05
Meso	Caushi.CD8-Effector(1)	-0.583563	0.0047578	-0.7526	7.9624e-05	3925.17	0.0268994	0.000185789
Meso	Yost_CD8 Act/Exh	-0.482726	0.00911616	-0.75134	8.94253e-06	3920.66	0.0326848	3.75586e-05
Meso	Caushi.CD8.TRM(V)	-0.481764	0.0120166	-0.749894	2.683e-05	3922.92	0.0355672	7.73337e-05
Meso	Oliveira_TET	-0.358382	0.0596883	-0.749219	1.56235e-05	3921.8	0.10847	5.46824e-05
Meso	Yost_CD8 Eff mem	-0.391864	0.0319794	-0.747607	8.41581e-06	3920.69	0.0681301	3.6386e-05
Meso	Li.CD8.DYS	-0.491318	0.00328287	-0.746244	9.72908e-07	3916.12	0.0265042	1.10539e-05
Meso	LCMV_TERMN.EX_Miller	-0.458554	0.0585297	-0.744385	0.00093561	3929.91	0.10847	0.00159924
Meso	B16_PROG.EX_Miller	-0.299433	0.189523	-0.740639	0.000595118	3929.01	0.287215	0.00109353
Meso	Oh.CD4.TH17	-0.40908	0.0503021	-0.737194	0.000173035	3926.61	0.0999245	0.000368639
Meso	Zheng_Exhau T Cell	-0.419849	0.028631	-0.737007	3.33229e-05	3923.3	0.0637691	9.2424e-05
Meso	Guo_Exhau CD4	-0.385331	0.0296867	-0.735022	1.52067e-05	3921.66	0.0651335	5.45216e-05
Meso	Oliveira_Tumor Spec_TET	-0.272734	0.176035	-0.734999	7.89816e-05	3925.05	0.272391	0.000185789
Meso	Caushi.MAIT	-0.221626	0.347574	-0.733979	0.000949554	3929.89	0.448188	0.00160442
Meso	Caushi.CD8-Effector(3)	-0.476755	0.00526246	-0.733355	3.90835e-06	3919.08	0.0276279	2.39387e-05
Meso	Oliveira_Tumor Spec_AAT	-0.352182	0.118822	-0.731534	0.000666691	3929.27	0.194076	0.00118077
Meso	Caushi.CD8.Effector(I)	-0.605599	0.00246292	-0.726173	0.000146522	3926.33	0.0247568	0.000326344
Meso	Oh.CD4.GZMB	-0.426176	0.0113718	-0.713942	3.17707e-06	3918.67	0.035215	2.12286e-05
Meso	Krishna.ACT.CD8.Stem.Like	-0.212439	0.289851	-0.710462	0.000242119	3927.2	0.387346	0.000499288
Meso	Lowery_NeoTCR4	-0.472019	0.00990809	-0.707828	2.19856e-05	3922.49	0.033102	6.87635e-05
Meso	Oh.CD8.CD39	-0.514532	0.00417885	-0.705599	1.41835e-05	3921.76	0.0265042	5.21242e-05
Meso	Caushi.CD8-Effector(2)	-0.507641	0.00164457	-0.691678	2.31705e-06	3918	0.0185963	1.77043e-05
Meso	Oliveira_Pro_Exhaust	-0.297802	0.273071	-0.682023	0.00838697	3934	0.36827	0.0123289
Meso	Caushi.CD8.Effector(III)	-0.365219	0.0339587	-0.678727	2.44395e-05	3922.79	0.0713132	7.32033e-05
Meso	Hanada_Reactive T Cell NSCLC	-0.590413	0.000172186	-0.67852	2.48752e-06	3918.18	0.00500397	1.77043e-05
Meso	Oh.CD4.CM	-0.631446	0.00721451	-0.672727	0.00202504	3931.39	0.0279088	0.00334473
Meso	Grog.CD4.IL6ST	-0.439166	0.00901268	-0.670061	1.96425e-05	3922.24	0.0326848	6.27706e-05
Meso	Caushi.CD8-TRM(1)	-0.461104	0.00935119	-0.658089	6.32688e-05	3924.58	0.0327292	0.000155008
Meso	LCMV_PROG.EX_Miller	-0.526705	0.0562569	-0.650632	0.013367	3934.86	0.106023	0.018364
Meso	Yost_Naive	-0.260747	0.188469	-0.647929	0.000491817	3928.6	0.287215	0.000926886
Meso	Oliveira_TM	-0.272016	0.293082	-0.62869	0.0103205	3934.41	0.388136	0.0150209
Meso	Guo_Supp Treg	-0.17797	0.416944	-0.621465	0.00335041	3932.3	0.506535	0.0054122
Meso	Grog.8Trm.1	-0.371072	0.0143668	-0.604577	2.42921e-05	3922.74	0.0391095	7.32033e-05
Meso	Guo_Exhau CD8	-0.395901	0.0307562	-0.603506	0.000375619	3928.11	0.0664876	0.000736213
Meso	Oh.CD4IL2RALO	-0.216816	0.264768	-0.600915	0.000623162	3929.12	0.363747	0.00111713
Meso	Caushi.CD8-MHCII	-0.291318	0.0597691	-0.597125	4.49059e-05	3924.06	0.10847	0.000120021
Meso	Caushi.CD8.TRM(III)	-0.239936	0.158745	-0.587462	0.00016265	3926.45	0.253647	0.000351612
Meso	Wu_OS Pancreatic CA	-0.321979	0.0909441	-0.582609	0.000763838	3929.58	0.159152	0.00133672
Meso	Grog.8EM	-0.468249	0.000281639	-0.580647	9.77556e-07	3916.58	0.00517512	1.10539e-05
Meso	Oh.TIL_CD4.GZMB	-0.272344	0.0944758	-0.572017	0.000267618	3927.49	0.163388	0.000538903
Meso	Grog.8Trm.2	-0.354639	0.00388362	-0.570965	8.16936e-07	3916.03	0.0265042	1.10539e-05
Meso	Grog.8chrom	-0.40142	0.0183844	-0.556027	0.000421533	3928.41	0.0450417	0.000815333
Meso	Caushi.CD8.Effector(II)	-0.413529	0.00651246	-0.550354	6.51432e-05	3924.75	0.0278512	0.000156985
Meso	Caushi.CD4-Th(3)	-0.177314	0.370195	-0.544062	0.00390753	3932.56	0.465629	0.00624356
Meso	Grog.8Trm.3	-0.297585	0.0155773	-0.542139	2.01553e-06	3917.76	0.0408904	1.77043e-05
Meso	Grog.Treg.1	-0.358243	0.0121119	-0.539867	3.19644e-05	3923.33	0.0355672	9.03608e-05
Meso	Exhaust_3_Feldman	-0.27142	0.0449826	-0.537535	1.6594e-05	3921.95	0.0918395	5.67282e-05
Meso	Yost_CD8 Activated	-0.110662	0.564384	-0.517178	0.00515423	3933.11	0.663716	0.00797549
Meso	Ahuluwalia_Prognostic Cell Death	0.105617	0.617446	-0.515091	0.0126671	3934.76	0.709099	0.017734
Meso	Grog.8EFF	-0.313406	0.013641	-0.51343	1.13749e-05	3921.35	0.0378344	4.40028e-05
Meso	Oh.CD8.XCL	-0.276065	0.079014	-0.50868	0.000589495	3928.99	0.141647	0.00109353
Meso	Ghatalia_T Cell Inflation RCC	-0.347913	0.000997802	-0.503873	3.53711e-07	3914.53	0.0133343	1.10539e-05
Meso	Chatani_TP	-0.468263	9.3501e-06	-0.487035	8.58193e-07	3916.31	0.00137446	1.10539e-05
Meso	Chen_Recurrent Papillary Thyroid	-0.484629	4.12784e-05	-0.484539	7.25796e-06	3920.44	0.00303396	3.44168e-05
Meso	Mem_Eff_4_Feldman	-0.310406	0.137316	-0.478455	0.0189035	3935.42	0.221819	0.025262
Meso	Oh.CD8.CM	-0.391356	0.0819804	-0.477387	0.0306903	3936.32	0.145194	0.0399245
Meso	Oh.CD8.MAIT	-0.420548	0.0247594	-0.465453	0.00778288	3933.85	0.0568693	0.0115627
Meso	Early.Act_5_Feldman	-0.0424579	0.840361	-0.457934	0.0241663	3935.88	0.876121	0.0317183
Meso	Yan_TCS	-0.295321	0.0064196	-0.455706	4.52304e-06	3919.5	0.0278512	2.55726e-05
Meso	Yan_CD8 IFN Gamma	-0.295321	0.0064196	-0.455706	4.52304e-06	3919.5	0.0278512	2.55726e-05
Meso	Grog.Treg.2	-0.195828	0.170372	-0.454804	0.000612383	3929.11	0.267619	0.00111136
Meso	Oh.TIL_CD4IL2RALO	-0.162536	0.315391	-0.454304	0.00331989	3932.3	0.41395	0.0054122
Meso	Caushi.CD8.TRM(I)	-0.179842	0.372611	-0.45158	0.0174534	3935.3	0.465629	0.0237561
Meso	Duhen_Tumor React CD8	-0.424072	0.000121153	-0.443974	1.09865e-05	3921.34	0.00500397	4.3649e-05
Meso	Novel_Sig	-0.44473	0.0164759	-0.434078	0.0107735	3934.46	0.0424904	0.0155265
Meso	Bao_MSI vs. MSS	-0.335591	0.0114988	-0.424683	0.000476892	3928.66	0.035215	0.00091043
Meso	Zou_Immune Rxn HCC	-0.208688	0.197159	-0.414403	0.00492181	3933.07	0.295738	0.00769687
Meso	Oh.TIL_CD4.GZMK	-0.406042	0.0153877	-0.397664	0.0128099	3934.79	0.0408904	0.0177647
Meso	Grog.CD4.Trm	-0.0491773	0.718921	-0.389914	0.00401382	3932.61	0.771397	0.00634442
Meso	Grog.8KLRB1	-0.366851	0.0105269	-0.376229	0.00589316	3933.37	0.0336404	0.0090239
Meso	Oh.TIL_CD4IL2RAHI	-0.0747034	0.628067	-0.375342	0.0124344	3934.71	0.715704	0.0175756
Meso	CD3.MT	-0.157957	0.242177	-0.332451	0.00778713	3933.86	0.335849	0.0115627
Meso	Qi_TREG	-0.206929	0.0473911	-0.318471	0.000841503	3929.78	0.0954314	0.0014553
Meso	Yuan_Hypoxia	-0.112168	0.428483	-0.31775	0.0178731	3935.39	0.516287	0.024104
Meso	Mo_Hypoxia	0.342752	0.00395842	0.301992	0.00724735	3933.81	0.0265042	0.0109831
Meso	Krishna.ACT.CD8.Term.Diff	0.264591	0.0974369	0.387654	0.0113033	3934.54	0.166549	0.0161318
Meso	Oh.CD4.PROLIF	0.302497	0.0219507	0.416218	0.00111884	3930.25	0.0528977	0.00186897
Meso	Liu_Hypoxia	0.232606	0.237565	0.445558	0.0195852	3935.6	0.332591	0.0259372
Meso	Exhaust_1_Feldman	0.346785	0.00611695	0.45737	0.000158615	3926.39	0.0278512	0.000348005
Meso	Oliveira_Prolif_T	0.354345	0.00716299	0.464747	0.000244549	3927.22	0.0279088	0.000499288
Meso	Oh.CD8.PRO	0.344552	0.00649298	0.471682	0.000111086	3925.68	0.0278512	0.000255151
Endo	Zhang CD8 TCS	-0.603493	1.75724e-10	-0.665311	1.60674e-13	27909	2.58315e-08	2.36191e-11
Endo	Caushi.Stem-like memory	-0.336074	0.000132531	-0.325973	9.87235e-05	27949	0.00255296	0.0010366
Endo	Caushi.CD8.Stem-like memory	-0.299137	0.00130259	-0.285539	0.00117532	27953.7	0.0147293	0.00959846
Endo	Jansen_Stem like	-0.267106	0.000582275	-0.292188	6.61201e-05	27948.2	0.00855944	0.000747666
Endo	Mem_Eff_6_Feldman	-0.220796	0.000501232	-0.257662	2.18684e-05	27946.1	0.0081868	0.000321465
Endo	Caushi.CD4CD8(I)	-0.174079	0.0134899	-0.200161	0.00286227	27955.3	0.0800708	0.0200359
Endo	Caushi.CD8.CD4CD8(I)	-0.174079	0.0134899	-0.200161	0.00286227	27955.3	0.0800708	0.0200359
Endo	Caushi.CD4-Th(1)	-0.17052	0.0183385	-0.230904	0.000766877	27952.9	0.0929572	0.00663123
Endo	Krishna.ACT.CD8.Stem.Like	-0.149163	0.0579516	-0.206318	0.00583725	27956.6	0.189909	0.0377108
Endo	Novel_Sig	-0.125463	0.0747088	-0.145646	0.0287092	27959.5	0.228796	0.114061
Endo	Duhen_Tumor React CD8	-0.10331	0.0154244	-0.109027	0.00743251	27957.1	0.0839773	0.0455241
Endo	Grog.8Mit	0.109558	0.0613896	0.186949	0.00075768	27952.9	0.19618	0.00663123
Endo	Oh.CD4.PROLIF	0.17006	0.00150592	0.293944	1.0966e-08	27931.1	0.0150233	2.68666e-07
Endo	Oliveira_Tumor Spec_Prolif T	0.17768	0.0245586	0.334808	8.3158e-06	27944.3	0.116455	0.000135825
Endo	Dai_Activation CD4 CD8	0.180731	0.00163519	0.150181	0.00590032	27956.7	0.0150233	0.0377108
Endo	Yang_Cuproptosis	0.185435	0.00938651	0.213256	0.0017417	27954.5	0.0689909	0.0134752
Endo	Oh.CD8.PRO	0.188523	0.000138937	0.3052	1.15211e-10	27921.8	0.00255296	8.46804e-09
Endo	Krishna.ACT.CD8.Term.Diff	0.192597	0.00185898	0.315109	8.74808e-08	27935.2	0.0160747	1.60746e-06
Endo	Oliveira_Prolif_T	0.194353	0.00013791	0.305607	3.80907e-10	27924.2	0.00255296	1.86645e-08
Endo	Exhaust_1_Feldman	0.195536	6.22429e-05	0.287646	7.10541e-10	27925.4	0.00182994	2.61124e-08
Endo	Mo_Hypoxia	0.21051	2.36442e-05	0.15959	0.000690204	27952.7	0.00115857	0.00663123
Endo	Caushi.CD8-Proliferating	0.231589	0.00115092	0.369454	4.72126e-08	27934.2	0.0140987	9.91464e-07
Endo	Caushi.CD8.Proliferating	0.232104	0.00161927	0.409845	5.04184e-09	27929.7	0.0150233	1.4823e-07
Endo	An_CervicalCA	0.258707	4.42537e-05	0.248193	2.79614e-05	27946.7	0.00162632	0.000373666
Endo	Liu_Hypoxia	0.439792	1.6123e-07	0.320867	6.28355e-05	27948.3	1.18504e-05	0.000747666
Ecto	Chen_Recurrent Papillary Thyroid	0.234352	0.0779703	0.280384	0.0186207	3388.44	0.0874933	0.0224364
Ecto	CD3.MT	0.267004	0.0634192	0.300067	0.0155413	3388.14	0.0717125	0.0188807
Ecto	Duhen_Tumor React CD8	0.270185	0.0234075	0.341938	0.0010077	3383.1	0.0286742	0.00153703
Ecto	Grog.CD4.FOS	0.294486	0.0363371	0.318221	0.0104849	3387.4	0.0414074	0.0130617
Ecto	CD8_B_Feldman	0.30536	0.104575	0.366963	0.0258461	3389.01	0.116458	0.0306401
Ecto	Oliveira_Tumor Spec_EM	0.307179	0.192719	0.415725	0.0419959	3389.84	0.20985	0.0479298
Ecto	Grog.8Mit	0.329326	0.0329694	0.285625	0.0440943	3389.91	0.0384643	0.0498605
Ecto	Yuan_Hypoxia	0.359151	0.0113117	0.418644	0.000791962	3382.67	0.0148466	0.00129281
Ecto	Yan_TCS	0.396965	0.00111548	0.331676	0.00158087	3383.97	0.00186461	0.00228122
Ecto	Yan_CD8 IFN Gamma	0.396965	0.00111548	0.331676	0.00158087	3383.97	0.00186461	0.00228122
Ecto	Qi_TREG	0.414405	0.00228605	0.385427	0.00102841	3383.2	0.00332722	0.00154262
Ecto	Oh.CD8.XCL	0.416937	0.0062867	0.41939	0.00158289	3383.98	0.0085569	0.00228122
Ecto	Guo_Activated Treg	0.423096	0.0237545	0.466858	0.00445713	3385.86	0.0288588	0.00612335
Ecto	Caushi.CD8.TRM(IV)	0.440874	0.0095736	0.402353	0.00634465	3386.57	0.0126786	0.00847876
Ecto	Mem_Eff_4_Feldman	0.443103	0.034594	0.486634	0.00817047	3387.01	0.0400419	0.010444
Ecto	Ghatalia_T Cell Inflation RCC	0.443719	0.000334105	0.420407	0.000116539	3379.21	0.000682132	0.000241284
Ecto	Grog.8Trm.2	0.446758	0.0053734	0.385052	0.00653261	3386.6	0.00738215	0.00865129
Ecto	Bao_MSI vs. MSS	0.448014	0.00114917	0.592063	6.96047e-07	3369.26	0.00187698	7.3085e-06
Ecto	Grog.8EM	0.456163	0.00107143	0.401736	0.000809107	3382.82	0.00186461	0.00129281
Ecto	Exhaust_1_Feldman	0.461652	0.000104895	0.316711	0.00228622	3384.56	0.000265854	0.00320071
Ecto	Feldman_CD8_G	0.468028	0.0273794	0.462637	0.0148287	3388.07	0.0329899	0.0183179
Ecto	Oh.CD8.PRO	0.471208	8.41181e-05	0.327303	0.00176941	3384.09	0.000230072	0.00252528
Ecto	Guo_Exhau CD4	0.485527	0.0152926	0.610672	0.000513901	3381.92	0.0192138	0.000888746
Ecto	Oh.TIL_CD4IL2RAHI	0.499355	0.00172888	0.46085	0.000808797	3382.69	0.00264278	0.00129281
Ecto	Oliveira_Prolif_T	0.506177	5.44058e-05	0.358609	0.00101423	3383.04	0.000166618	0.00153703
Ecto	Oh.CD4.PROLIF	0.50681	0.000141796	0.333616	0.0042197	3385.74	0.000336193	0.00585184
Ecto	CD8_G_Feldman	0.510223	0.0150443	0.487912	0.00955059	3387.3	0.0190647	0.0119995
Ecto	Grog.8Trm.1	0.51309	0.000322649	0.509375	3.60575e-05	3376.8	0.000668019	9.91174e-05
Ecto	Grog.CD4.Trm	0.514771	0.000103639	0.543455	2.05448e-06	3371.19	0.000265854	1.35215e-05
Ecto	Mem_Eff_6_Feldman	0.514907	0.00340286	0.536985	0.000413398	3381.47	0.00490412	0.000723446
Ecto	Wang_Cytokine Exp	0.530109	6.08729e-05	0.489092	2.06091e-05	3375.71	0.000182619	6.88048e-05
Ecto	Yost_CD8_Memory	0.530187	0.00476386	0.546868	0.000759984	3382.71	0.0066375	0.00125525
Ecto	Early.Act_5_Feldman	0.537869	0.0233092	0.436228	0.0420608	3389.86	0.0286742	0.0479298
Ecto	Dai_Activation CD4 CD8	0.542759	0.000534876	0.370336	0.00614105	3386.4	0.00104836	0.00828197
Ecto	Oh.TIL_CD4.GZMB	0.550383	0.00100593	0.53995	0.000176021	3379.8	0.00178158	0.000345
Ecto	Mel_Exhaust_Tirosh	0.557747	0.00478622	0.569128	0.000857522	3382.79	0.0066375	0.00134102
Ecto	Oh.CD4.Activate	0.560439	0.00171723	0.525817	0.00068384	3382.4	0.00264278	0.00115545
Ecto	Grog.8Trm.3	0.563313	2.77917e-05	0.503503	1.383e-05	3375.13	0.000104753	5.31234e-05
Ecto	Oliveira_Tumor Spec_Pro_Exhaust	0.564311	0.032744	0.615171	0.00765751	3386.89	0.0384643	0.00987416
Ecto	Li_Immune Inf	0.566017	0.00173209	0.490972	0.00182983	3384.24	0.00264278	0.00258639
Ecto	Zou_Immune Rxn HCC	0.566322	0.000448545	0.609555	2.10627e-05	3375.84	0.000891028	6.88048e-05
Ecto	Caushi.CD8.TRM(I)	0.570661	0.00797017	0.624384	0.000869121	3382.87	0.0107488	0.00134485
Ecto	Grog.8EFF	0.571417	3.27381e-05	0.484077	4.37516e-05	3377.23	0.000120313	0.000112833
Ecto	Oh.TIL_CD4IL2RALO	0.572983	0.000308677	0.542702	7.95758e-05	3378.3	0.000648222	0.000179964
Ecto	Ahuluwalia_Prognostic Cell Death	0.579228	0.0124618	0.652114	0.00139913	3383.82	0.0162114	0.0020775
Ecto	Caushi.CD8-MHCII	0.589219	0.00021572	0.572541	2.97801e-05	3376.39	0.000503346	8.93404e-05
Ecto	Grog.Treg.2	0.593093	0.000101924	0.531786	5.49373e-05	3377.68	0.000265854	0.000132285
Neural	Novel_Sig	0.593499	0.187164	0.0149103	0.970772	582.084	0.39874	0.987704
Ecto	Oliveira_Tumor Spec_AAT	0.599827	0.0144284	0.585011	0.00569335	3386.31	0.0184432	0.00774928
Ecto	Zhang CD8 TCS	0.604307	0.0165099	0.456709	0.0327505	3389.45	0.0205674	0.037908
Ecto	Yost_Naive	0.608491	0.000815695	0.544968	0.000846575	3382.95	0.00146228	0.00133814
Ecto	Exhaust_3_Feldman	0.619797	4.65748e-05	0.600329	3.54467e-06	3372.22	0.000152144	1.89748e-05
Ecto	Lowery_NeoTCR4	0.633394	0.00125842	0.678065	6.17416e-05	3377.89	0.00198912	0.000144064
Ecto	Oh.CD8.Naive	0.655	0.00180072	0.623591	0.000660033	3382.38	0.00270108	0.0011282
Ecto	Grog.Treg.1	0.657875	7.86509e-06	0.578938	5.86491e-06	3373.45	4.28211e-05	2.7811e-05
Ecto	Caushi.CD4CD8(I)	0.664558	0.00112891	0.653234	0.000264046	3380.68	0.00186461	0.000479195
Ecto	Caushi.CD8.CD4CD8(I)	0.664558	0.00112891	0.653234	0.000264046	3380.68	0.00186461	0.000479195
Ecto	Hanada_Reactive T Cell NSCLC	0.672788	0.000693817	0.675612	0.000109587	3379.13	0.00130758	0.000230133
Ecto	Oh.CD4IL2RAHI	0.684865	0.00214495	0.753256	9.37296e-05	3378.95	0.00315307	0.000202621
Ecto	Guo_Supp Treg	0.69379	0.00119755	0.711743	0.000107521	3378.93	0.0019345	0.000229067
Ecto	Guo_Exhau CD8	0.695687	0.000772764	0.686323	0.000126542	3379.3	0.00140242	0.000254818
Ecto	Krishna.ACT.CD8.Stem.Like	0.698399	0.000754672	0.634844	0.000355186	3381.28	0.00138671	0.000629065
Ecto	Grog.8chrom	0.705599	2.21758e-05	0.605964	1.93124e-05	3375.74	9.05514e-05	6.73536e-05
Ecto	Lowery_NeoTCR8	0.735324	0.000658033	0.701051	0.000126223	3379.27	0.00125624	0.000254818
Ecto	Novel_Sig	0.739179	0.000113062	0.693892	3.4239e-05	3376.82	0.000281698	9.67911e-05
Ecto	Caushi.CD4-Tfh(1)	0.753168	0.00812126	0.679181	0.00659385	3386.63	0.010853	0.00865443
Ecto	Krishna.ACT.CD8.Term.Diff	0.765287	1.45368e-06	0.554867	5.57935e-05	3377.6	1.33557e-05	0.000132285
Ecto	Zheng_Exhau T Cell	0.767182	0.00122962	0.800758	8.34539e-05	3378.45	0.00196472	0.000185875
Ecto	Caushi.CD4CD8(II)	0.780677	0.000252878	0.751904	5.09185e-05	3377.65	0.000563229	0.000126865
Ecto	Caushi.CD8.CD4CD8(II)	0.780677	0.000252878	0.751904	5.09185e-05	3377.65	0.000563229	0.000126865
Ecto	Oliveira_Tumor Spec_TET	0.787859	0.000220433	0.773452	1.97021e-05	3375.67	0.000506308	6.73536e-05
Ecto	Yost_CD8 Activated	0.79142	4.25612e-05	0.714527	1.93446e-05	3375.62	0.000147423	6.73536e-05
Ecto	Caushi.CD4-Treg	0.802465	0.000565116	0.744458	0.000276779	3380.88	0.00109305	0.000496177
Ecto	Oliveira_TET	0.809646	8.45161e-05	0.768274	1.12674e-05	3374.67	0.000230072	4.47651e-05
Neural	Oh.CD8.PRO	0.81151	0.00570686	1.13123	6.12666e-05	564.848	0.104863	0.00225155
Ecto	Oh.CD4.GZMK	0.813922	3.05052e-06	0.711976	1.35893e-06	3370.64	2.13537e-05	1.15809e-05
Ecto	Li.CD8.DYS	0.819716	0.000269687	0.810643	3.78882e-05	3376.97	0.000583	0.000101265
Ecto	Oh.CD8.CD39	0.821083	0.000127521	0.787042	2.53575e-05	3376.28	0.000312428	8.10336e-05
Ecto	B16_TERMINAL.EX_Miller	0.826141	0.000304897	0.833905	5.36523e-05	3377.63	0.000648222	0.000131448
Ecto	Caushi.CD8-Effector(3)	0.826361	4.02585e-05	0.704551	3.64105e-05	3376.98	0.000144341	9.91174e-05
Neural	Exhaust_1_Feldman	0.827917	0.00518421	1.09789	0.000112631	565.755	0.104863	0.00331136
Ecto	Oh.CD4.CXCL13	0.828	0.0010921	0.830059	0.000153656	3379.71	0.00186461	0.000305236
Ecto	Oh.CD4IL2RALO	0.83039	5.24568e-05	0.761777	1.51223e-05	3375.29	0.000165781	5.55745e-05
Ecto	Tang_Ferroptosis	0.848501	0.00183943	0.8218	0.000703689	3382.42	0.00273127	0.00117548
Ecto	Caushi.CD8-Effector(2)	0.849109	9.23544e-06	0.732975	6.77538e-06	3373.8	4.84861e-05	3.01812e-05
Ecto	Caushi.CD4-Th(2)	0.858055	1.78279e-06	0.836972	5.69094e-08	3364.48	1.54159e-05	1.04571e-06
Ecto	Yost_CD8 Eff mem	0.860718	1.42114e-05	0.776674	3.61425e-06	3372.41	6.14433e-05	1.89748e-05
Ecto	Caushi.CD8.Effector(II)	0.861005	5.72058e-06	0.769019	2.1259e-06	3371.41	3.46535e-05	1.35215e-05
Ecto	Oliveira_EMT	0.86747	1.19636e-05	0.778777	4.49968e-06	3372.89	5.49577e-05	2.20485e-05
Ecto	Caushi.Stem-like memory	0.87128	0.00361887	0.638504	0.0152734	3388.13	0.00516479	0.0187099
Neural	Oliveira_Prolif_T	0.885172	0.00467259	1.21959	5.12432e-05	564.318	0.104863	0.00225155
Ecto	Oliveira_Tumor Spec_Prolif T	0.885601	2.69223e-05	0.691576	0.000191347	3380.04	0.000104753	0.000370106
Ecto	Caushi.CD8.TRM(III)	0.895535	9.5538e-07	0.751243	1.50011e-06	3370.84	1.08031e-05	1.15809e-05
Ecto	Caushi.CD8-TRM(2)	0.896947	7.89721e-05	0.705722	0.000225338	3380.38	0.000227626	0.000424676
Ecto	Liu_Hypoxia	0.897538	1.1223e-05	0.827927	7.7897e-06	3374.07	5.32185e-05	3.27167e-05
Ecto	Oliveira_TM	0.897861	0.000263956	0.778945	0.00021221	3380.17	0.000579128	0.000405128
Ecto	Yost_CD8 Act/Exh	0.903762	2.74746e-05	0.866319	2.57721e-06	3371.83	0.000104753	1.45711e-05
Ecto	Zheng_TREG	0.910366	6.68495e-05	0.952066	1.57563e-06	3370.79	0.000196538	1.15809e-05
Ecto	Caushi.CD8.Stem-like memory	0.914597	0.00174388	0.685954	0.00847619	3387.07	0.00264278	0.0107414
Ecto	Caushi.CD8.Effector(III)	0.923998	1.97463e-06	0.784242	2.2076e-06	3371.51	1.61262e-05	1.35215e-05
Ecto	Oh.CD4.TH17	0.924585	1.12125e-05	0.898367	1.01699e-06	3370.22	5.32185e-05	9.96651e-06
Ecto	Caushi.CD8.TRM(II)	0.932175	4.31238e-05	0.874017	1.04498e-05	3374.54	0.000147423	4.26701e-05
Ecto	Oh.CD4.GZMB	0.943579	1.77812e-07	0.843545	4.07426e-08	3363.64	3.26729e-06	8.55594e-07
Ecto	Caushi.CD8-TRM(1)	0.957573	5.89346e-06	0.745058	2.78837e-05	3376.44	3.46535e-05	8.66521e-05
Ecto	Caushi.CD8.Effector(I)	0.960592	3.90239e-06	0.818097	3.7783e-06	3372.55	2.60751e-05	1.91521e-05
Ecto	Caushi.CD4-Tfh(2)	0.96401	1.113e-05	0.930092	1.37421e-06	3370.54	5.32185e-05	1.15809e-05
Neural	Oh.CD4.PROLIF	0.966211	0.00329935	1.28896	3.87916e-05	564.039	0.104863	0.00225155
Ecto	Caushi.CD8.TRM(V)	0.968581	1.40497e-06	0.867781	4.40534e-07	3368.46	1.33557e-05	5.35137e-06
Ecto	Jansen_Stem like	0.986982	2.93534e-06	0.868284	1.73864e-06	3371.23	2.13537e-05	1.21704e-05
Ecto	B16_PROG.EX_Miller	1.04302	9.78786e-05	0.985261	4.18028e-05	3377.4	0.000261603	0.000109732
Ecto	LCMV_TERMN.EX_Miller	1.04979	4.45042e-05	0.94255	2.82946e-05	3376.58	0.000148685	8.66521e-05
Ecto	Caushi.CD4-Th(1)	1.05275	5.47164e-07	0.951186	1.63227e-07	3366.63	8.04332e-06	2.66605e-06
Ecto	Yost_CD8 Exh	1.05409	6.53712e-06	0.955322	2.32622e-06	3371.61	3.69599e-05	1.36781e-05
Ecto	Caushi.CD4-Th(3)	1.05815	3.67451e-08	0.852075	1.89228e-07	3366.66	9.00254e-07	2.78165e-06
Ecto	Exhaust_2_Feldman	1.05839	8.4039e-05	1.20829	4.7325e-07	3368.23	0.000230072	5.35137e-06
Ecto	Wu_OS Pancreatic CA	1.05921	7.46927e-08	0.922911	2.65525e-08	3363.01	1.56855e-06	7.80644e-07
Ecto	An_CervicalCA	1.06043	2.58486e-08	0.903829	3.96435e-08	3363.38	7.59949e-07	8.55594e-07
Ecto	Wang_OS Benefit	1.06611	2.16807e-06	0.860044	1.4094e-05	3375.2	1.6774e-05	5.31234e-05
Ecto	Caushi.CD8-Effector(1)	1.06662	4.99471e-06	0.890408	6.99484e-06	3373.56	3.19227e-05	3.02424e-05
Neural	Krishna.ACT.CD8.Term.Diff	1.07245	0.0049425	1.1687	0.000799589	570.552	0.104863	0.0146924
Ecto	Caushi.CD8.Proliferating	1.08466	8.76813e-09	0.77938	1.42954e-06	3370.68	4.29638e-07	1.15809e-05
Ecto	Oh.CD8.FGFBP2	1.0905	1.27009e-08	0.916701	1.87605e-08	3362.23	4.66759e-07	6.89448e-07
Ecto	Caushi.CD8.MAIT	1.13791	9.30948e-07	1.13539	1.65739e-08	3362.16	1.08031e-05	6.89448e-07
Ecto	LCMV_PROG.EX_Miller	1.15994	1.36518e-05	0.907648	7.32626e-05	3378.34	6.08127e-05	0.000168275
Ecto	Caushi.MAIT	1.18102	1.40774e-06	1.06601	3.94854e-07	3368.28	1.33557e-05	5.27669e-06
Ecto	TOX_Scott	1.26507	6.51357e-07	0.983857	6.7034e-06	3373.63	8.70449e-06	3.01812e-05
Ecto	Caushi.CD8-Proliferating	1.29318	7.35458e-12	0.942833	4.86159e-09	3359.74	1.08112e-09	6.89448e-07
Ecto	Yang_PD1Hi_Checkpoint	1.37244	1.08022e-09	1.09782	1.49556e-08	3362.07	7.93964e-08	6.89448e-07
Neural	Caushi.CD8.Proliferating	1.38529	0.00474534	1.56138	0.000620305	570.359	0.104863	0.0130264
Ecto	Jansen_Term diff	1.89098	3.16158e-07	1.33438	3.20935e-05	3376.77	5.16392e-06	9.25047e-05

[truncated: 2 more sheets: Supp T11, Supp T12]
